1 **Title:**

2 Myosin II regulatory light chain phosphorylation and formin availability modulate cytokinesis upon  
3 changes in carbohydrate metabolism.

4

5 **Running title:**

6 Regulation of cytokinesis during respiration.

7

8 **Authors:**

9 Francisco Prieto-Ruiz<sup>1</sup>, Elisa Gómez-Gil<sup>1,2</sup>, Rebeca Martín-García<sup>3</sup>, Armando Jesús Pérez-Díaz<sup>1</sup>, Jero  
10 Vicente-Soler<sup>1</sup>, Alejandro Franco<sup>1</sup>, Teresa Soto<sup>1</sup>, Pilar Pérez<sup>3</sup>, Marisa Madrid<sup>1\*</sup> and José Cansado<sup>1\*</sup>

11

12 <sup>1</sup>Yeast Physiology Group. Department of Genetics and Microbiology. Campus de Excelencia  
13 Internacional de Ámbito Regional (CEIR) Campus Mare Nostrum, Universidad de Murcia. 30071  
14 Murcia, Spain.

15 <sup>2</sup>The Francis Crick Institute, 1 Midland Road, London, NW1 1AT, UK.

16 <sup>3</sup>Instituto de Biología Funcional y Genómica (IBFG), Consejo Superior de Investigaciones Científicas,  
17 Universidad de Salamanca. 37007 Salamanca, Spain.

18

19 \* To whom correspondence should be addressed:

20 José Cansado, Department of Genetics and Microbiology, Universidad de Murcia, 30071 Murcia, Spain.

21 Tel: +34868884953; Email: [jcansado@um.es](mailto:jcansado@um.es)

22 Marisa Madrid, Department of Genetics and Microbiology, Universidad de Murcia, 30071 Murcia, Spain.

23 Tel: +34868887132; Email: [marisa@um.es](mailto:marisa@um.es)

24

25 **Author Contributions:** J.C. and M.M. supervised the study. J.C., M.M., and P.P. conceived and designed  
26 the study. F.P-R., E.G-G., R.M.-G., J.C., and M.M. developed the methodology. F.P-R., E.G-G., R.M.-G.,  
27 A.P.-D., J.V-S., A.F., and T.S. designed and performed experiments. F.P-R., E.G-G., R.M.-G., A.P.-D.,  
28 J.V-S., A.F., T.S., P.P., M.M. and J.C. analyzed and interpreted the data. J.C., M.M., and P.P. wrote,  
29 reviewed and revised the manuscript.

30

31 **Keywords:** Cytokinesis; Respiration; Myosin II; Formin; p21-activated kinase; Fission Yeast

32 **Abstract**

33 Cytokinesis, which achieves the separation of daughter cells after mitosis completion, relies in animal  
34 cells on a contractile actomyosin ring (CAR), made of actin and class II myosins, whose activity is  
35 heavily influenced by regulatory light chain (RLC) phosphorylation. However, in simple eukaryotes such  
36 as fission yeast *Schizosaccharomyces pombe*, regulation of CAR dynamics by RLC phosphorylation  
37 seems dispensable. We found that redundant phosphorylation at Ser35 of the *S. pombe* RLC homolog  
38 Rlc1 by the p21-activated kinases Pak1 and Pak2, modulates Myosin II Myo2 activity and becomes  
39 essential for cytokinesis and cell growth during respiration. Previously, we showed that the Stress  
40 Activated Protein Kinase Pathway (SAPK) MAPK Sty1 controls fission yeast CAR integrity by  
41 downregulating formin For3 levels (Gomez-Gil et al.,2020). Here we report that reduced availability of  
42 formin For3-nucleated actin filaments for the CAR is the main reason for the required control of myosin  
43 II contractile activity by RLC phosphorylation during respiration-induced oxidative stress. Hence,  
44 recovery of For3 levels with antioxidants bypasses the control of Myosin II function regulated by RLC  
45 phosphorylation to allow cytokinesis and cell proliferation during respiration. Therefore, a fine-tuned  
46 interplay between Myosin II function by Rlc1 phosphorylation and environmentally controlled actin  
47 filament availability is critical for a successful cytokinesis in response to a switch to a respiratory  
48 carbohydrate metabolism.

## 49 **Introduction**

50 Cytokinesis, the final step in cell division, enables the physical separation of daughter cells after  
51 mitosis has been completed [1]. In non-muscle animal cells, this process is based on the formation of a  
52 contractile actomyosin ring ('CAR'), made of actin filaments and non-muscle myosin II (NMII), which  
53 generates the mechanical force for actomyosin contractility [2, 3]. The prototype NMII motor unit is a  
54 complex assembled by two heavy chains, two light chains known as ELC (essential light chain), which  
55 provide structural integrity to the complex, and two regulatory light chains or RLC, which induce a  
56 change in NMII from a folded to an extended conformation to modulate its activity in response to  
57 phosphorylation [2]. Phosphorylation of RLC at Ser19 is critical for NMII to achieve an extended  
58 conformation, which results in the spontaneous and immediate formation of bipolar filaments with  
59 enhanced actin binding affinity and increased ATPase motor activity [2, 4, 5]. Accordingly, NMII is  
60 enzymatically inactive in the absence of RLC phosphorylation at this site [6], thus resulting in defective  
61 cytokinesis and an increase in multinucleate cells [7], which are phenotypes similar to those induced by  
62 deletion or pharmacological inhibition of NMII [8, 9]. ROCK (Rho-associated coiled-coil-containing  
63 kinase), CITK (citron kinase), and ZIPK (zipper-interacting protein kinase) are involved in NMII  
64 activation by RLC phosphorylation on Ser19 during its accumulation at the cleavage furrow, and CAR  
65 contraction, stabilization, and scission during cytokinesis [2]. RLC phosphorylation at additional sites  
66 besides Ser19, including Thr18, Ser1/2 and/or Tyr-155, provide further regulatory layers to modulate  
67 either positively or negatively the contractile activity of NMII within specific cellular conditions [2].

68 *Schizosaccharomyces pombe*, a Crabtree-positive fission yeast that can grow through either  
69 fermentative or respiratory metabolism, is a well-established model organism studying cytokinesis [10-  
70 12]. This simple eukaryote employs a CAR to achieve cellular division with two myosin-II heavy chains  
71 known as Myo2 and Myp2/Myo3 [13]. Myo2 function is essential for viability and cytokinesis during  
72 normal growth conditions, while Myp2 plays a subtle non-essential role for cytokinesis during  
73 unperturbed growth, and is specifically required for cell survival in response to saline stress [14-16].  
74 Contrary to animal NMII, purified Myo2 does not form filaments at physiological saline concentrations,  
75 but instead adopts a unipolar organization, with the head domains exposed to the cytoplasm and its tails  
76 anchored into medial precursor nodes of the CAR during the mitotic onset [17-20]. The essential formin  
77 Cdc12 is responsible for the nucleation and elongation of actin filaments at the nodes. At early anaphase,  
78 a search, capture, pull, and release mechanism driven by Myo2 promotes the fusion of the equatorial  
79 nodes to form a mature CAR [21-23]. For3, a non-essential diaphanous-like formin that assembles actin  
80 cables for cellular transport, also plays a significant role in fission yeast cytokinesis nucleating actin  
81 filaments for CAR assembly and disassembly [24, 25]. Remarkably, in response to cytoskeletal damage

82 and environmental cues, the stress-activated signaling protein kinase pathway (SAPK), and its core  
83 effector Sty1, a p38 MAPK ortholog, promotes CAR disassembly and block cell division by reducing  
84 For3 levels and the availability of actin filaments [25]. Once formed, coordinated CAR constriction by  
85 Myo2 and Myp2, and concomitant plasma membrane and primary septum formation at late anaphase,  
86 generate the physical barriers that allow the separation of the two daughter cells [10, 13, 26].

87 Cdc4 and Rlc1 are the respective ELC and RLC shared by Myo2 and Myp2 in fission yeast [27-  
88 29]. Early evidence indicated that Ser35 and Ser36 of Rlc1, which are homologous to RLC Thr18 and  
89 Ser19 in NMIIIs, are phosphorylated by the p21/Cdc42-activated kinase (PAK) ortholog Pak1/Shk1/Orb2  
90 [30], which has also been involved in RLC phosphorylation at Ser19 in animal cells [31]. It was described  
91 that Pak1-dependent phosphorylation of Rlc1 at Ser35 and Ser36 delays cytokinesis, and that expression  
92 of a non-phosphorylatable mutant version at both residues (*rlc1-S35A S36A*), results in premature CAR  
93 constriction [30]. These observations are consistent with *in vitro* data showing that Rlc1 phosphorylation  
94 decreases the interaction of Myo2 with actin in force generation [17]. This and a later work identified  
95 Ser35 as the sole target for Pak1 both *in vitro* and *in vivo* [17, 32]. On the other hand, another study  
96 described that Myo2 motility is reduced in fission yeast cells expressing an *rlc1-S35A S36A* mutant  
97 version, and that phosphorylation at these sites has a positive effect on CAR constriction dynamics [33].  
98 Hence, while the essential role of RLC phosphorylation for NMII activity is firmly established in animal  
99 cells, the biological significance of Rlc1 phosphorylation at Ser35 during fission yeast cytokinesis  
100 remains currently unclear.

101 Here we show that modulation of Myo2 activity by Rlc1 phosphorylation at Ser35 is essential for  
102 fission yeast cytokinesis and proliferation during respiratory growth. This posttranslational modification  
103 is not only exerted by Pak1 but also by Pak2, a second PAK ortholog whose expression increases during  
104 respiration. We also show that Rlc1 phosphorylation at Ser35 becomes essential due to the reduced  
105 availability of For3-nucleated actin filaments caused by SAPK activation during respiration-induced  
106 oxidative stress. Our findings reveal how formin-dependent actin filament nucleation and Myosin II  
107 activity are linked for optimal cytokinesis control in response to changes in MAPK signaling and carbon  
108 source metabolism.

109

## 110 **Results**

111

112 *Myosin-II regulatory light chain phosphorylation is essential for S. pombe cytokinesis and growth*  
113 *during respiration*

114 To gain further insight into the contribution of RLC phosphorylation during Myosin II-dependent  
115 control of cytokinesis in *S. pombe*, we expressed a C-terminal HA-tagged version of Rlc1 under the  
116 control of its native promoter in *rlc1Δ* cells. This construct was fully functional and suppressed the  
117 defects associated with the lack of Rlc1 function, including defective CAR positioning and multiseptation  
118 (Figure 1—figure supplement 1A) [27]. We noted that in extracts from exponentially growing cells the  
119 Rlc1-HA fusion migrates in SDS-PAGE as two discernible bands (Figure 1A). Rlc1 mobility in extracts  
120 from a strain expressing a mutated version where Ser36 was changed to alanine (Rlc1(S36A)-HA) was  
121 similar to the wild-type strain. In contrast, only the faster-migrating band was observed in mutants  
122 expressing either Rlc1(S53A)-HA or Rlc1 (S35A S36A)-HA fusions (Figure 1A). Thus, in these assays  
123 the slower motility band corresponds to the *in vivo* Rlc1 isoform phosphorylated at Ser35. Increased Rlc1  
124 expression does not alter CAR integrity and/or cytokinesis in fission yeast [34]. Hence, to precisely  
125 follow Rlc1 phosphorylation and localization dynamics during the cell cycle, we co-expressed Rlc1-GFP  
126 (genomic fusion) and Rlc1-HA (integrative fusion) tagged versions in cells carrying an analogue-sensitive  
127 version of the Cdk1 kinase ortholog Cdc2 (*cdc2-asM17*) [35], and a Pcp1-GFP fusion (pericentrin SPB  
128 component; internal control for mitotic progression). Simultaneous live fluorescence microscopy and  
129 Western blot analysis of synchronized cells released from the G2 arrest, showed that *in vivo* Rlc1  
130 phosphorylation at Ser35 was very low at the nodes stage during CAR assembly, raised gradually during  
131 ring maturation, and reached its maximum at the onset of CAR contraction until the final stages,  
132 decreasing slowly during septum closure and cell separation (Figure 1B). As early suggested [30], these  
133 results confirm that *in vivo* Rlc1 phosphorylation at Ser35 is enhanced during CAR constriction and  
134 septum formation stages.

135 Time-lapse fluorescence microscopy of exponentially glucose-growing cells from asynchronous  
136 cultures showed only a minimal but statistically significant increase in the overall time for ring  
137 constriction and disassembly in Rlc1(S35A)-GFP cells as compared to wild-type Rlc1-GFP cells ( $18,00 \pm$   
138  $3,90$  vs  $16,70 \pm 2,44$  min, respectively; n=92 cells) (Figure 1C). Therefore, in contrast to animal non-  
139 muscle cells, where regulatory light chain phosphorylation is essential for NMII activity [2], *in vivo*  
140 phosphorylation of Rlc1 has a minimal impact on myosin II function during CAR dynamics when fission  
141 yeast cells grow vegetatively in the presence of glucose. These findings prompted us to search for other  
142 environmental and/or nutritional condition/s where Rlc1 phosphorylation-dependent control of Myosin II  
143 activity might become essential for fission yeast cytokinesis. A recent study performed with a prototroph  
144 *S. pombe* deletion-mutant collection described that *rlc1Δ* cells struggle to grow in a glycerol-based  
145 medium that imposes a respiratory metabolism [36]. Indeed, and in contrast to wild-type cells, the growth  
146 of *rlc1Δ* cells was strongly reduced when cultured in plates with 3% glycerol and 0.08% glucose as

147 carbon sources (Figure 1D). Strikingly, cells expressing the unphosphorylated *rlc1-S35A* and *rlc1-S35A*  
148 *S36A* mutants also grew very slowly in this medium (Figure 1D). This behavior was strictly dependent  
149 upon Rlc1 phosphorylation at Ser35, since expression of an Rlc1-HA fusion in *rlc1Δ* cells by employing a  
150  $\beta$ -estradiol-regulated promoter [37], allowed their growth on glycerol only in the presence of 0.5  $\mu$ M  $\beta$ -  
151 estradiol, whereas conditional expression of the unphosphorylated Rlc1(S35A)-HA mutant version did  
152 not (Figure 1—figure supplement 1B-C). Contrary to cells expressing wild-type Rlc1, the growth of *rlc1-*  
153 *S35A* cells transferred to a glycerol-based liquid medium was limited to 3-4 further divisions (Figure 1E),  
154 and resulted in a progressive increase in multiseptated cells with engorged septa and lysed cells,  
155 suggesting the existence of a cytokinetic defect (Figure 1E-F). Accordingly, time-lapse fluorescence  
156 microscopy analysis revealed that the total time for ring assembly and disassembly in *rlc1-S35A* cells  
157 incubated with glycerol for 8 hours was much longer than in those expressing wild-type Rlc1 ( $62,97 \pm$   
158  $6,39$  vs  $49,49 \pm 4,24$  min, respectively;  $n \geq 37$  cells) (Figure 1G-H). The cytokinetic delay was mainly  
159 observed during the stage of ring constriction and disassembly ( $44,29 \pm 4,49$  vs  $26,84 \pm 3,22$  min,  
160 respectively) (Figure 1G-H). The above findings support that *in vivo* Rlc1 phosphorylation at Ser35 plays  
161 an essential role to modulate *S. pombe* cytokinesis and cell division during respiratory growth.

162

163 ***The redundant p21/Cdc42-activated kinases Pak2 and Pak1 phosphorylate Rlc1 at Ser35 together with***  
164 ***to positively control fission yeast cytokinesis and division during respiratory growth***

165 Earlier work has provided strong evidence that the essential fission yeast p21 (*cdc42/rac*)-  
166 activated protein kinase (PAK) Pak1/Shk1/Orb2, phosphorylates Rlc1 at Ser35 both *in vitro* and *in vivo*  
167 [30, 32]. In agreement with these studies, the *in vivo* phosphorylation of an Rlc1-HA fusion at Ser35  
168 became progressively reduced in glucose-growing cells expressing the analog-sensitive (as) kinase mutant  
169 Pak1-M460A treated with the specific kinase inhibitor 3-BrB-PP1, but not in the presence of the solvent  
170 control (Figure 2—figure supplement 1A). Interestingly, light chain phosphorylation at Ser35 was absent  
171 in glucose-growing cells expressing the hypomorphic mutant allele Pak1-M460G (Figure 2A) [30],  
172 suggesting that this kinase version is constitutively inactive towards Rlc1. Unexpectedly, Rlc1 remained  
173 phosphorylated at Ser35 in cells with this mutated kinase during growth with glycerol as a carbon source  
174 (Figure 2A). The simplest explanation for these observations is that other kinase/s besides Pak1 can  
175 specifically phosphorylate Rlc1 *in vivo* at Ser35 during respiratory growth.

176 A reasonable candidate to perform such a role is Pak2, a second PAK homolog whose over-  
177 expression has been shown to restore the viability and normal morphology of fission yeast cells lacking  
178 Pak1, thus suggesting that both kinases may share common substrates and functions [38, 39]. In support  
179 of this hypothesis, Rlc1 phosphorylation at Ser35 was absent during respiratory growth in Pak1-M460G

180 *pak2* $\Delta$  double mutant cells, whereas it remained phosphorylated in a *pak2* $\Delta$  mutant growing with either  
181 glucose or glycerol (Figure 2A). In contrast to Pak1, Pak2 was undetectable after Western blot analysis in  
182 glucose-growing cells co-expressing genomic Pak1-GFP and Pak2-3GFP fusions (Figure 2B). However,  
183 its expression levels increased when the cells were either transferred to a medium lacking a nitrogen  
184 source or cultured with glycerol as a carbon source (Figure 2B). Enhanced Pak2-3GFP expression was  
185 also observed in glucose-rich medium as the cells reached the stationary phase of growth, when the  
186 availability of this carbohydrate is minimal (Figure 2B). Nevertheless, the relative expression of Pak2 was  
187 always very low compared to Pak1 and could only be detected after long exposure times of immunoblots  
188 (>20 min; LE; Figure 2B). Microarray-based studies have shown that *pak2*<sup>+</sup> mRNA levels increase in *S.*  
189 *pombe* during nitrogen starvation through a mechanism that relies on Ste11, a master transcription factor  
190 that activates gene expression during the early steps of the sexual differentiation [40]. Accordingly, *pak2* $\Delta$   
191 cells display defective fusion during mating and produce aberrant asci [41]. The *pak2*<sup>+</sup> promoter shows  
192 two consecutive copies of a putative Ste11-binding motif known as the TR box (consensus sequence 5'-  
193 TTCTTTGTTY-3') (Figure 2C) [42]. Indeed, the induced expression of a Pak2-3GFP fusion during  
194 nitrogen starvation or growth with glycerol was totally abrogated in *ste11* $\Delta$  cells, and in a strain where  
195 *pak2*<sup>+</sup> expression is under the control of an endogenous promoter version mutated at the two TR boxes  
196 (Figure 2C). The Zn-finger transcriptional factor Rst2, whose activity is negatively regulated by the  
197 cAMP-PKA signaling pathway in the presence of glucose, positively regulates *ste11*<sup>+</sup> expression during  
198 nitrogen or glucose starvation [43]. In the presence of glucose, and in contrast to wild-type cells, Pak1  
199 deletion prompted a constitutive increase in Pak2-GFP expression (Figure 2D). Moreover, Rst2 deletion  
200 suppressed the enhanced expression of Pak2-GFP in glucose-growing *pkal* $\Delta$  cells and in the presence of  
201 glycerol (Figure 2D). Hence, Pak2 expression is constitutively repressed by cAMP-PKA signaling during  
202 glucose fermentation and increases specifically during respiratory growth in an Rst2- and Ste11-  
203 dependent manner.

204 The very low expression levels of the Pak2-3GFP genomic fusion prevented the microscopic  
205 visualization of its subcellular localization during nutrient starvation. To circumvent this situation, we  
206 obtained a strain expressing a Pak2-GFP fusion under the control of the native *pak1*<sup>+</sup> promoter (*p*<sup>*pak1*+</sup>-  
207 Pak2-GFP). The relative expression levels of *p*<sup>*pak1*+</sup>-Pak2-GFP during vegetative growth were  
208 approximately 2-3 times those of the Pak1-GFP genomic fusion (Figure 2—figure supplement 1B).  
209 Nevertheless, in contrast to Pak1-GFP, which is targeted at the cell poles and the CAR during vegetative  
210 growth with either glucose or glycerol, the *p*<sup>*pak1*+</sup>-Pak2-GFP fusion localized exclusively to the CAR in  
211 both conditions (Figure 2E). Time-lapse fluorescence microscopy of glycerol-growing cells revealed that

212 Pak2 co-localized with Rlc1 during the entire cytokinetic process, starting with the early steps of CAR  
213 assembly and maturation to the later stages of ring constriction (Figure 2F).

214 Compared to wild-type cells, Pak1-M460G and *pak2Δ* cells did not display cytokinetic, septation,  
215 or growing defects during respiration with glycerol as a carbon source (Figure 2G-J). Strikingly, cells  
216 from a Pak1-M460G *pak2Δ* double mutant showed a noticeable increase in the average time for CAR  
217 assembly and disassembly (Fig 2G,H), a multiseptated phenotype (Figure 2I), and a moderated growth  
218 defect in glycerol-rich medium with respect to the wild type, Pak1-M460G, and *pak2Δ* single mutants  
219 (Figure 2J). Taken together, our observations support that Pak1 is fully responsible for *in vivo* Rlc1  
220 phosphorylation at Ser35 during fermentative growth, whereas Pak2, whose expression is induced upon  
221 nutrient starvation, collaborates with Pak1 to phosphorylate Rlc1 at this residue to regulate cytokinesis  
222 during respiratory growth.

223

224 ***PAK phosphorylation of Rlc1 becomes critical for S. pombe cytokinesis during respiration due to***  
225 ***impaired For3-dependent actin cable nucleation imposed by SAPK activation***

226 The formin For3 assembles actin cables for cellular transport and co-operates with the essential  
227 formin Cdc12 to nucleate actin filaments for fission yeast CAR assembly and disassembly [24, 25]. For3  
228 absence elicits a clear delay during ring constriction and/or disassembly in glucose-rich medium [24]. The  
229 cytokinetic delay of *for3Δ* cells increased significantly in the presence of glycerol (Figure 3—figure  
230 supplement 1A), and, similar to the *rlc1-S35A* mutant (Figure 1E-F), led to the accumulation of  
231 multiseptated and lysed cells and a marked growth defect (Figure 3—figure supplement 1B-D). These  
232 observations support that actin cable nucleation by For3 is a crucial factor ensuring proper cytokinesis  
233 and growth of *S. pombe* cells during respiratory metabolism.

234 Glucose limitation or absence causes the activation of Sty1, a p38 MAPK ortholog, and the  
235 critical effector of the fission yeast SAPK pathway [44]. We have recently shown that activated Sty1  
236 down-regulates CAR assembly and stability in *S. pombe* in response to cytoskeletal damage and  
237 environmental stress by reducing For3 levels [25]. Notably, the transfer of exponentially growing cells  
238 co-expressing genomic Sty1-HA and For3-3GFP fusions from a glucose-rich medium to a medium with  
239 glycerol, induced a rise in Sty1 activity that was maintained over time, as measured by Western blot  
240 analysis with anti-phospho-p38 antibody, and a concomitant decrease in For3-3GFP protein levels (Figure  
241 3A). Similar to environmental stresses [25], the drop in For3 levels observed during growth in glycerol is  
242 likely associated with increased ubiquitination of the formin, since it was attenuated in cells of the  
243 temperature-sensitive proteasome mutant *mts3-1* (Figure 3—figure supplement 1E). We used  
244 immunofluorescence microscopy of cells stained with AlexaFluor-488-phalloidin, and calculated the



245 number and density of actin cables by computing the cable-to-patch ratio via image segmentation using  
246 the machine learning routine Ilastik [45]. As shown in Figure 3B, the actin cable/patch ratio was  
247 significantly lower in wild-type cells growing with glycerol than in those growing with glucose as carbon  
248 source. The actin patches also appeared partially depolarized and their density increased during growth  
249 with glycerol (Figure 3B). Fluorescence intensity at the cell poles and the CAR of a CRIB-3GFP probe  
250 that detects explicitly the activated state of Cdc42 GTPase, which triggers For3 activation *in vivo* [46],  
251 was also decreased under respiratory growth conditions (Figure 3—figure supplement 2A-B).  
252 Accordingly, the overall intensity of a For3-3GFP fusion at the cell poles (G2 cells), and the CAR (late M  
253 cells), was reduced during respiratory growth as compared to glucose-fermenting cells (Figure 3B).

254 In sharp contrast to wild-type cells (Figure 3A), we observed that the total levels of a  
255 constitutively active genomic version of this formin (For3(DAD)-2GFP)[46] were not reduced in  
256 response to Sty1 activation during growth with glycerol (Figure 3C). Cells expressing this Sty1-  
257 insensitive For3 allele displayed engrossed actin cables with an increased actin cable to patch ratio  
258 (Figure 3D-E), and required a shorter time for CAR assembly and disassembly as compared to the wild  
259 type (Figure 3F-G). Most importantly, the simultaneous expression of the *for3-DAD* allele in *rlc1-S35A*  
260 cells suppressed to a large extent their altered cable organization (Figure 3D-E), cytokinetic delay and  
261 multiseptated phenotype (Figure 3F-I), and defective growth in glycerol-rich medium (Figure 3J). The  
262 expression of *for3-DAD* also significantly abrogated the cytokinetic and growth defects in glycerol of a  
263 Pak1-M460G *pak2Δ* double mutant (Figure 3F-J), which lacks detectable *in vivo* phosphorylation of Rlc1  
264 at Ser35 (Figure 2A). Together, these observations indicate that For3 and PAK-phosphorylated Rlc1 may  
265 perform a collaborative role during cytokinesis that becomes biologically significant when *S. pombe* cells  
266 grow through a respiratory metabolism.

267 In line with our previous observations [25], total For3-GFP levels increased in glucose-growing  
268 *wis1Δ* or *rlc1-S35A wis1Δ* strains lacking the Sty1-activating MAPKK Wis1[47] (Figure 4A), and  
269 remained significantly higher than in the Sty1-activated isogenic counterparts during growth with glycerol  
270 (Figure 4A). Similar to the *sty1Δ* mutant [25], *wis1Δ* cells growing in glycerol showed engrossed actin  
271 cables and an increase in the actin cable to patch ratio per cell with respect to the wild type (Figure 4B-  
272 C). Significantly, Wis1 deletion increased the actin cable to patch ratio in Rlc1-S35A-GFP cells (Figure  
273 4B-C), strongly suppressed their delayed cytokinesis and multiseptation (Figure 4D-G), and restored their  
274 growth in glycerol-rich medium to a large extent (Figure 4H). Phosphorylation of Rlc1 at Ser35 has a  
275 minimal biological impact on *S. pombe* CAR dynamics during glucose fermentation (Figure 1C). Our  
276 results predict that a constitutive increase in Sty1 activity should elicit cytokinetic defects in glucose-  
277 growing *rlc1-S35A* cells. In agreement with this view, *rlc1-S35A* cells lacking the MAPK tyrosine

278 phosphatase Pyp1, which display increased basal Sty1 activity and reduced For3 levels [25], underwent a  
279 significant delay in the time for CAR assembly and closure (Figure 4I-J), and accumulated septated cells  
280 during stationary phase (Figure 4K-L). Therefore, tight control of Rlc1 function by phosphorylation at  
281 Ser35 becomes essential for *S. pombe* cytokinesis when the levels of For3 formin are reduced by activated  
282 SAPK pathway.

283

### 284 ***Control of Myo2 activity by Rlc1 phosphorylation regulates S. pombe cytokinesis and growth during*** 285 ***respiration***

286 The thermo-sensitive and motor-deficient Myosin II heavy chain allele *myo2-E1* carries a  
287 mutation (G345R), that results in reduced ATPase activity and actin-filament binding *in vitro* [13]. We  
288 observed that the deficient growth in glycerol of *rlc1-S35A* cells was also displayed by *Myo2-E1* cells, but  
289 not by those expressing a hypomorphic allele of the essential Myosin II light chain Cdc4 (*cdc4-8*) or in a  
290 mutant lacking Myp2, a second Myosin II heavy chain that collaborates with Myo2 for CAR constriction  
291 during growth and saline stress [13, 16, 48] (Figure 5A). Accordingly, the time for CAR assembly and  
292 disassembly was much longer in *myo2-E1* cells incubated at a semi-restrictive temperature (2 h at 30°C),  
293 and changed to the permissive temperature in a glycerol-based medium as compared to glucose-rich  
294 conditions ( $78,59 \pm 11,09$  vs  $61,67 \pm 7,56$  min, respectively) (Figure 5B-C). Although the respiration-  
295 induced cytokinetic delay was evident during both stages of CAR assembly/maturation and ring  
296 constriction/disassembly, it was more intense during the latter stages of ring closure (Figure 5B-C).  
297 Similar to *rlc1-S35A* cells, the *Myo2-E1* cytokinetic defect also resulted in the accumulation of many  
298 lysed and multiseptated cells with engrossed septa (Figure 5D-E). On the contrary, the delay in CAR  
299 closure displayed by glucose-growing *myp2Δ* cells *versus* wild-type cells (~7.5 min;  $n \geq 37$  cells), was very  
300 similar to that observed during growth in glycerol (~7.7 min;  $n \geq 65$  cells) (Figure 5—figure supplement  
301 1A). Myp2 deletion increased the number of septated and multiseptated cells during growth in glucose  
302 and, particularly, in the presence of glycerol. This phenotype was aggravated when combined with the  
303 *rlc1-S35A* allele (Figure 5—figure supplement 1B).

304 Expression of the *for3-DAD* allele alleviated the altered cable organization (Figure 5F-G), and  
305 reduced the cytokinetic delay of *myo2-E1* cells during CAR assembly/maturation and ring  
306 constriction/disassembly (Figure 5H-I), as well as their multiseptated phenotype (Figure 5J). Moreover,  
307 simultaneous expression of *for3-DAD* restored the growth of *myo2-E1* cells in glucose- and glycerol  
308 media at semi-restrictive temperatures (Figure 5K). On the other hand, either *myo2-E1 rlc1-S35A* and  
309 *myo2-E1 wis1Δ* double mutants were synthetic lethal. Therefore, specific regulation of myosin II heavy  
310 chain Myo2 function by Pak1/Pak2-dependent *in vivo* phosphorylation of Rlc1 becomes critical to ensure

311 *S. pombe* cytokinesis and division during respiration due to decreased For3-dependent actin filament  
312 nucleation elicited by SAPK activation.

313

314 ***Exogenous antioxidants bypass the need for Rlc1 phosphorylation to regulate myosin II activity and***  
315 ***cytokinesis during respiratory growth***

316 In animal cells, aerobic respiration is accompanied by the production of reactive oxygen species  
317 (ROS), which typically arise due to electron leakage from the mitochondrial electron transport chain [49].  
318 *S. pombe* cells also produce free radicals during respiratory growth [50], and the ensuing endogenous  
319 oxidative stress prompts Sty1 activation and an antioxidant response both at transcriptional and  
320 translational levels [51] (Figure 6A). Remarkably, the increased Sty1 basal activity of wild-type and *rlc1-*  
321 *S35A* cells growing with glycerol was largely counteracted in the presence of 0.16 mM of reduced  
322 glutathione (GSH), an antioxidant tripeptide, and this was accompanied by a recover in total For3 levels  
323 (Figure 6A). As expected, segmentation analysis confirmed that the cable-to-patch ratio was significantly  
324 improved in glycerol-growing *rlc1-S35A* and *Myo2-E1* cells supplemented with GSH, compared to those  
325 growing without the antioxidant (Figure 6B-C). Furthermore, the delayed CAR constriction and  
326 disassembly, and the multiseptation of both *rlc1-S35A* or *Myo2-E1* cells during growth with glycerol,  
327 were alleviated in the presence of GSH (Figure 6D-G). Most importantly, the simple addition of GSH  
328 allowed *rlc1-S35A* and *Myo2-E1* cells to resume growth and proliferate in the presence of glycerol  
329 (Figure 6H). This growth-recovery phenotype was For3-dependent since it was not shown by *rlc1-S35A*  
330 *for3Δ* cells incubated in the presence of the antioxidant (Figure 6H). Hence, oxidative stress is the leading  
331 cause of the formin-dependent reduction in the nucleation of actin cables, and imposes regulation of  
332 Myo2 function by Rlc1 phosphorylation as a critical factor in the execution of cytokinesis during  
333 respiration.

334

335

336 **Discussion**

337 RLC phosphorylation is a common regulatory mechanism of myosin II activity both in muscle  
338 and non-muscle cells. RLC phosphorylation plays a key positive role as a regulator of myosin II function  
339 in cardiac muscle contraction under normal and disease conditions [52]. Patients with heart failure usually  
340 show reduced RLC phosphorylation, and restoring its normal phosphorylation status represents a  
341 promising approach toward improving the function of the diseased heart [53]. In non-muscle vertebrate  
342 cells, RLC phosphorylation at Ser19 is essential for NMII contractile activity during cell migration and  
343 division [2, 7]. This also applies to invertebrates like *Drosophila melanogaster*, where *in vivo*

344 phosphorylation of *spaghetti-squash* RLC at the conserved Ser21 is critical to activate myosin II, thus  
345 avoiding embryonic lethality and severe cytokinesis defects [54]. Contrariwise, in the unicellular amoeba  
346 *Dictyostelium discoideum* RLC phosphorylation at the conserved Ser13 is not essential for regulating  
347 Myosin II function, since expression of a non-phosphorylatable S13A mutant version fully rescues the  
348 cytokinetic and developmental defects of RLC-null cells [55].

349         Despite also being a simple eukaryote, the effect of RLC phosphorylation on Myosin II activity  
350 during cytokinesis in the fission yeast *S. pombe* has remained elusive. While some studies indicated that  
351 lack of Rlc1 phosphorylation at the conserved Ser35 delays CAR constriction [17, 30], other works  
352 suggest just the opposite [33]. This Crabtree-positive organism uses aerobic fermentation instead of  
353 respiration for ATP production when glucose is available, whereas mitochondrial energy metabolism is  
354 significantly reduced [56]. Importantly, and to our knowledge, the experimental setup in all the published  
355 studies exploring the functional and mechanistic insights of fission yeast cytokinesis has relied on the  
356 employment of wild-type and mutant cells growing fermentatively in glucose-rich minimal or complex  
357 media. In these conditions, the impact of Rlc1 phosphorylation in cytokinesis is very modest since *rlc1-*  
358 *S35A* cells show only a minimal delay in CAR constriction and disassembly compared to wild-type cells.  
359 However, in this work, we show that this somehow secondary role becomes indispensable when yeast  
360 cells switch to a respiratory metabolism in the absence of glucose. In this metabolic state, lack of Rlc1  
361 phosphorylation at Ser35 resulted in a significant delay in the dynamics of CAR assembly and  
362 disassembly, leading to a multiseptated phenotype and a decreased growth on respirable carbon sources  
363 such as glycerol. Moreover, our findings also support that Myo2, the leading Myosin II heavy chain  
364 isoform that regulates fission yeast CAR assembly and constriction under most conditions [57], is the  
365 main regulatory target for Rlc1 Ser35 phosphorylation to allow *S. pombe* cytokinesis during respiration.  
366 According to this view, the cytokinetic defects of cells expressing the hypomorphic allele *myo2-E1*,  
367 which shows reduced ATPase activity and actin-filament binding [13], become notoriously exacerbated  
368 during respiration and resemble those of *rlc1-S35A* cells. Therefore, the biological relevance of Rlc1  
369 phosphorylation to modulate Myo2 activity *in vivo* for CAR assembly and constriction in *S. pombe*  
370 strongly depends on the carbohydrate metabolism during the transition from fermentation to respiration.

371         Fission yeast p21-activated kinase Pak1 phosphorylates Rlc1 at Ser35 *in vivo* in glucose-rich  
372 medium [30, 32]. However, genetic, biochemical, and cell biology evidences presented in this work  
373 support that the second PAK ortholog Pak2 collaborates with Pak1 to phosphorylate Rlc1 at this residue  
374 for adequate CAR contractility during respiratory growth (Figure 6—figure supplement 1). Accordingly,  
375 the lack of activity of both kinases, but not each one separately, resulted in cytokinetic and respiratory  
376 growth defects very similar to those shown by *rlc1-S35A* cells. Pak2 performs an important positive role

377 during the nitrogen starvation-induced sexual development in fission yeast, and Pak2-null cells show  
378 mating defects that result in the formation of aberrant asci [41]. We found that Pak2 levels, which are not  
379 detected during fermentative growth with glucose, are markedly induced upon nitrogen starvation and  
380 during respiratory growth in the absence of glucose through a transcriptional mechanism involving the  
381 Ste11 transcription factor. Importantly, Ste11 expression is in turn activated by Rst2, another transcription  
382 factor whose activity is strongly repressed in the presence of nitrogen and glucose by the cAMP-PKA  
383 pathway [43], thus restricting Pak2 availability and function to physiological contexts where either or  
384 both nutrients are not available. Hence, it seems very likely that in such scenarios Pak2 may target  
385 multiple protein substrates, some of them in a redundant fashion with Pak1, as a booster for PAK activity.  
386 Recent phosphoproteomic screens have identified additional Pak1 substrates besides Rlc1 that function in  
387 fermentative growth during cytokinesis, including the F-BAR protein Cdc15 or the anilin-like medial ring  
388 protein Mid1, and also during polarized growth, such as the Cdc42 GEF Scd1, the RhoGAP Rga4, or the  
389 cell end marker Tea3, among others [32]. However, the observation that Pak2 only localizes to the CAR  
390 during respiratory growth, suggests that its functional redundancy with Pak1 might be restricted to  
391 cytokinesis-associated proteins.

392 In animal cells, both *de novo* actin assembly at the division site and cortical transport/flow  
393 contribute with actin filaments for the CAR [58-60]. In fission yeast cells, which lack an actin filament  
394 cortex, the CAR is assembled chiefly by Myo2 from actin filaments nucleated *de novo* at the cytokinesis  
395 nodes by the essential formin Cdc12 and partially from Cdc12-nucleating actin cables pulled from non-  
396 equatorial region [61, 62]. However, further evidence demonstrated that actin filaments nucleated by  
397 For3, the formin that assembles the actin cables that participate in polarized secretion and growth, also  
398 contribute to CAR formation in fission yeast [24, 25]. In turn, the activated SAPK pathway down-  
399 regulates in *S. pombe* CAR assembly and stability in response to stress by reducing For3 levels [25, 63].  
400 Like animal cells, fission yeast respiratory metabolism induces endogenous oxidative stress with electron  
401 leakage from the mitochondrial electron transport chain [49]. This resulted in enhanced SAPK activation,  
402 downregulation of For3 levels, and a concomitant reduction in actin filaments. Our findings strongly  
403 support that in this metabolic situation, Rlc1 phosphorylation becomes critical regulating Myo2 function  
404 during cytokinesis due to a decrease in For3-nucleated actin filaments. Accordingly, recovery of actin  
405 filaments availability during respiration by alternative strategies, including the expression of a  
406 constitutively active For3 version, limitation of For3 downregulation in SAPK-less mutants, or  
407 attenuation of the endogenous metabolic oxidative stress with antioxidants (GSH), was sufficient to  
408 restore CAR assembly/constriction and cytokinesis both in *rlc1-S35A* and *myo2-E1* mutants during  
409 respiration, thus allowing cell growth. Compared to wild-type cells, the number of actin filaments at the

410 CAR is reduced approximately by half in *myo2-E1* cells [64], which might explain why enhanced  
411 nucleation of actin filaments by For3 alleviates their defective actin-binding and motor activity during  
412 cytokinesis.

413         Accumulating evidence suggests that metabolic reprogramming fuels the actin cytoskeletal  
414 rearrangements that occur during the response of cells to external forces, epithelial-to-mesenchymal  
415 transition, and cell migration. They are accompanied by glycolysis and oxidative phosphorylation  
416 alterations that provide the required energy for these rearrangements [65-67]. However, a yet unanswered  
417 question is how changes in cell metabolism prompt actin cytoskeletal remodeling [67]. Our observations  
418 reveal a sophisticated adaptive interplay between modulation of Myosin II function by  
419 Rlc1 phosphorylation and environmentally controlled formin availability, which becomes critical for a  
420 successful cytokinesis during a respiratory carbohydrate metabolism (Figure 6—figure supplement 1).  
421 Altogether, these findings provide a remarkable example of how carbohydrate metabolism dictates the  
422 relative importance of different sources of actin filaments for CAR dynamics during cellular division.

423

#### 424 **Acknowledgments**

425         We thank Pedro M. Coll for providing yeast strains and plasmids. This research was funded by  
426 the Agencia Estatal de Investigación and Ministerio de Ciencia e Innovación, Spain, grant numbers  
427 PID2020-112569GB-I00 and PGC2018-098924-B-I00, and the Regional Government of Castile and  
428 Leon, Spain, grant number CSI150P20. European Regional Development Fund (ERDF), co-funding from  
429 the European Union. F.P.-R. and A.P.-D. are, respectively, Formación de Profesorado Universitario PhD  
430 fellows from the Ministerio de Educación y Formación Profesional and the Universidad de Murcia, Spain.

431

#### 432 **Competing interests**

433 The authors declare that they have no conflict of interest.

434

#### 435 **MATERIALS AND METHODS**

##### 436 **Strain construction.**

437         *Schizosaccharomyces pombe* strains used in this work are listed in Supplementary Table S1.  
438 Several deletion strains were obtained from the Bioneer mutant library [68], whereas null mutants in  
439 *rlc1<sup>+</sup>*, *pka1<sup>+</sup>* and *ste11<sup>+</sup>* genes were obtained by ORF deletion and replacement with G418 (kanR),  
440 nourseothricin (NAT), or hygromycin B cassettes by employing a PCR-mediated strategy [69, 70], and  
441 the oligonucleotides described in Supplementary Table S2. Strains expressing different genomic fusions  
442 were constructed either by transformation or after random spore analysis of appropriate crosses in

443 sporulation agar (SPA) medium [71]. To generate a strain expressing an integrated Rlc1-HA fusion, the  
444 *rlc1*<sup>+</sup> ORF plus its endogenous promoter were amplified by PCR using genomic DNA from *S. pombe*  
445 972h<sup>-</sup> wild-type strain as the template and the 5' and 3' oligonucleotides PromRlc1(XhoI)-FWD and Rlc1-  
446 GFP(SacII)-REV (Supplementary Table S2), which include, respectively, a *XhoI* restriction site and an  
447 extended DNA sequence encoding a HA C-terminal tag plus a *SacII* site. The *XhoI*-*SacII* digested PCR  
448 fragment was cloned into plasmid pJK210 [72], sequenced, linearized with *BmgBI*, and transformed into  
449 an *rlc1Δ ura4.294* strain. To obtain a strain expressing an integrative Rlc1-HA fusion under the control of  
450 the  $\beta$ -estradiol promoter [37], the *rlc1*<sup>+</sup> ORF fused to a 3' HA tag was amplified by PCR 5' and  
451 3' oligonucleotides Rlc1 (*SmaI*)- FWD and Rlc1-HA (*SacII*)-REV, which include, respectively, *SmaI* and  
452 *SacII* restriction sites. The amplified PCR product was cloned into a modified plasmid pJK210 containing  
453 a  $\beta$ -estradiol regulated promoter Z<sub>3</sub>EV [37], and the resulting construct was linearized with *StuI*, and  
454 transformed into an *rlc1Δ ura4.294* strain. To obtain a strain expressing an integrative Rlc1-GFP fusion,  
455 DNA encoding an Rlc1-GFP fusion under the endogenous promoter was amplified by PCR using as the  
456 template a genomic DNA from a *S. pombe* strain expressing a genomic Rlc1-GFP fusion (Supplementary  
457 Table S1), and the 5' and 3' oligonucleotides PromRlc1(XhoI)-FWD and Rlc1-GFP(SacII)-REV, which  
458 include *SmaI* and *SacII* restriction sites, respectively. The resulting DNA fragment was cloned into  
459 plasmid pJK210, linearized with *StuI*, and transformed into an *rlc1Δ ura4.294* strain. In all cases Ura<sup>4+</sup>  
460 transformants were obtained, and the correct integration and expression of the Rlc1-HA and Rlc1-GFP  
461 fusions fusion under either the endogenous or the  $\beta$ -estradiol regulated promoters were verified by both  
462 PCR and Western blot analysis, respectively. To generate strains expressing Rlc1-HA and Rlc1-GFP  
463 versions with mutations at Ser35 and/or Ser36 residues to Alanine, the pJK210 plasmids described above  
464 containing either Rlc1-GFP or Rlc1-HA fusions were subjected as templates to site-directed mutagenesis  
465 by PCR, by employing specific mutagenic oligonucleotides described in Supplementary Table S2. Then  
466 mutagenized plasmids were linearized with *BmgBI* and transformed into an *rlc1Δ ura4.294* strain.

467 The *S. pombe* strain expressing a genomic Pak2-3GFP fusion was obtained in two successive  
468 steps. First, the *pak2*<sup>+</sup> ORF plus its endogenous promoter were amplified by PCR using genomic DNA  
469 from *S. pombe* 972h<sup>-</sup> wild-type strain as the template, and the 5' and 3' oligonucleotides PromPak2(XhoI)-  
470 FWD (*XhoI* site) and Pak2GFP(*SmaI*/*XmaI*)-REV (*SmaI* site) (Supplementary Table S2). The PCR  
471 product was cloned in frame into a pJK210 plasmid containing a GFP C-terminal Tag. In a second step,  
472 this construct was linearized with *SmaI* and two additional GFP tags were added by a Gibson assembly  
473 approach. Finally, the resulting plasmid was linearized with *BmgBI* and transformed in a *pak2Δ ura4.294*  
474 strain. To introduce the mutations at the two putative Ste11-binding motifs in Pak2 promoter (TR box),  
475 the pJK210-Pak2-3GFP plasmid was subjected to sequential site-directed mutagenesis by PCR. In this

476 way, the conserved G in each motif was replaced by A by employing the mutagenic oligonucleotides  
477 described in Supplementary Table S2. To generate a strain producing a Pak2-GFP fusion under the  
478 control of Pak1 promoter, Pak1 5'UTR sequence was amplified by PCR using genomic DNA from *S.*  
479 *pombe* 972h<sup>-</sup> wild-type strain and assembled by Gibson cloning to a PCR-amplified Pak2-GFP fragment  
480 and the pJK210 plasmid linearized with *Sma*I. The resulting plasmid was digested with *Bmg*BI and  
481 transformed in a *pak2Δ ura4.294* strain.

482

### 483 **Media and growth conditions.**

484 In experiments performed with liquid cultures, fission yeast strains were grown overnight with  
485 shaking at 28°C in YES-Glucose medium, which includes 0.6% yeast extract, 2% glucose, and is  
486 supplemented with adenine, leucine, histidine, or uracil (100 mg/liter) [73]. The next day, cultures were  
487 diluted to an OD<sub>600</sub> of 0.01 and incubated until reaching a final OD<sub>600</sub> of 0.2. Then, cells were recovered  
488 by filtration, washed three times, and shifted to either YES-Glucose or YES-Glycerol (0.6% yeast extract,  
489 0.08% glucose, 0.86% glycerol, plus supplements), and incubated at 28°C for 4 h before imaging. In  
490 experiments performed with the *Myo2-E1* mutant, cells recovered from cultures at 28°C were resuspended  
491 in YES-Glucose or YES-Glycerol, incubated at 30°C for 2 h, and then at 28°C for the remainder of the  
492 experiment. In experiments with cells expressing the analogue-sensitive Cdc2 (CDK) kinase version  
493 *cdc2-asM17* [35], cells from log-phase liquid cultures in YES-Glucose (OD<sub>600</sub> 0.5), were treated with 1  
494 μM 3-NM-PP1 (Sigma-Aldrich, 529581) for 3.5 h, recovered by filtration, washed, and resuspended in  
495 YES-Glucose medium. In experiments with strains expressing an analog-sensitive Pak1 kinase version  
496 Pak1-M460A, log-phase liquid cultures were divided in two and incubated for different times in YES-  
497 Glucose medium treated with 10 μM 3-BrB-PP1 (Abcam, ab143756), or in medium lacking the analog  
498 kinase inhibitor. In nitrogen starvation experiments, strains growing exponentially in Edinburgh Minimal  
499 Medium (EMM2)[74] with 2% glucose (OD<sub>600</sub> 0.5), were recovered by filtration and resuspended in the  
500 same medium lacking ammonium chloride for the indicated times. In the plate assays of stress sensitivity  
501 for growth, *S. pombe* wild-type and mutant strains were grown in YES-Glucose liquid medium to an  
502 OD<sub>600</sub> of 1.2, recovered by centrifugation, resuspended in YES to a density of 10<sup>7</sup> cells/ml, and  
503 appropriate decimal dilutions were spotted on YES-Glucose (2% glucose), or YES-Glycerol (0.08%  
504 glucose plus 3% glycerol), solid plates (2% agar). Plates were incubated for 3 days (YES-Glucose), or 5  
505 days (YES-Glycerol), at different temperatures (28°C, 30°C, 32°C, and/or 34°C), depending on the  
506 experiment, and then photographed. All the assays were repeated at least three times with similar results.  
507 Representative experiments are shown in the corresponding Figures. When required, solid and or liquid



508 media were supplemented with varying amounts of  $\beta$ -estradiol (Sigma-Aldrich, RPN2106), or reduced  
509 glutathione (GSH; Sigma-Aldrich, G6013).

510

### 511 **Microscopy analysis.**

512 For *time-lapse* imaging of CAR dynamics, 300  $\mu$ l of cells growing exponentially for 4 h in YES-  
513 Glucose or YES-Glycerol liquid medium, and prepared as described above, were placed in a well from a  
514  $\mu$ -Slide eight well (Ibidi, 80826), previously coated with 10  $\mu$ l of 1 mg/ml soybean lectin (Sigma-Aldrich,  
515 L2650) [25]. When required, GSH was incorporated into the medium at a final concentration of 0.3 mM.  
516 Cells were left to sediment in the culture media and attach to the well bottom for 1 min, and images were  
517 captured every 2.5 min for 2 h in YES-Glucose cultures, or every 5 min for 8 h in YES-Glycerol cultures.  
518 Experiments were performed at 28°C, and single middle planes from a set of six stacks (0.61  $\mu$ m each)  
519 were taken at the indicated time points. Time-lapse images were acquired using a Leica Stellaris 8  
520 confocal microscope with a 63X/1.40 Plan Apo objective and controlled by the LAS X software. The time  
521 for node condensation and ring maturation includes the time from SPB separation until the start of CR  
522 constriction. The time for ring constriction and disassembly includes the time from the first frame of ring  
523 constriction until the last frame where it becomes completely constricted and disassembled. The total time  
524 for ring assembly and disassembly is the sum of these two values.  $n$  is the total number of cells scored  
525 from at least three independent experiments. Statistical comparison between two groups was performed  
526 by unpaired Student's *t*-test.

527 To perform actin staining with Alexa-Fluor phalloidin, 5 ml mid-log cultures in YES-Glucose  
528 (OD<sub>600</sub> 0.5), or YES-Glycerol (OD<sub>600</sub> 0.2), were grown for 12 h after media shift. Cells were fixed by  
529 shacking for 1 h with 3.7% formaldehyde in PEM buffer (10 mM EGTA; 1 mM MgSO<sub>4</sub>; 100 mM PIPES  
530 pH 6.9, 75 mM sucrose and 0.1% Triton X-100). After three washes with PEM, the cell pellets were  
531 resuspended in 20  $\mu$ l of cold 40% methanol solution, stained with 8  $\mu$ l of 5 mg/ml Alexa fluor 488-  
532 conjugated phalloidin (Thermo Fisher Scientific, A12379), and incubated in a rotary platform overnight at  
533 4°C in the dark. Images of stained cells were acquired from samples spotted on glass slides with a Leica  
534 Stellaris 8 confocal microscope using a 100X/1.40 Plan Apo objective (7 stacks of 0.3  $\mu$ m each). For  
535 actin segmentation analysis, the Ilastik routine with the Pixel classification tool [45], was trained with two  
536 representative images, one from cell growing in YES-Glucose medium, and one with cells growing in  
537 YES-Glycerol. The training involves drawing cables, patches and background in three different colors.  
538 Once the program was trained, the remaining images from the different experiments were uploaded to  
539 Ilastik to perform the segmentation routine. The resulting images were then exported to ImageJ [75], and  
540 segmented cells at G2 were analysed using the color histogram tool, obtaining the specific areas

541 corresponding to cables and patches. The data from  $n \geq 40$  cells growing in YES-Glycerol were obtained  
542 for each cell by dividing the cable area by the patch area, and the ratio was normalized with respect to the  
543 average obtained from wild-type cells growing with YES-Glucose medium. To perform For3-GFP  
544 quantification Ilastik was trained drawing For3-GFP dots, GFP background and image background in  
545 three different colors. The For3-GFP patch to cytosol ratio was calculated by dividing the For3-GFP color  
546 area between the GFP background area from at least  $n \geq 40$  cells in G2 or late M (dividing cells) and  
547 normalized with the average of the glucose ratio.

548 For cell wall staining, fission yeast cells were cultured in YES-Glucose or YES-Glycerol for  
549 different times in the absence or presence of 0.3 mM of GSH. Cells from 1 ml aliquots were recovered by  
550 centrifugation, stained with 1  $\mu$ l of 0.5 mg/ml calcofluor white, and images were acquired from samples  
551 spotted on glass slides with a Leica Stellaris 8 confocal microscope using a 63X/1.40 Plan Apo objective  
552 (6 stacks of 0.61  $\mu$ m each). The percentage of septated (one septa), multiseptated (two or more septa), and  
553 lysed cells, was calculated at the indicated time points for each strain and condition from three  
554 independent experiments.  $n \geq 100$  cells were counted from several images captured during each replicate.

555

#### 556 **Western blot analysis.**

557 To detect levels of Rlc1-HA fusion and/or its phosphorylation status, fission yeast cultures were  
558 grown in YES-Glucose or YES-Glycerol as described above, and 10 ml samples were collected and  
559 precipitated with TCA [76]. Protein extracts were resolved in 15% SDS-PAGE gels, transferred to  
560 nitrocellulose blotting membranes, and immunoblotted with a mouse monoclonal anti-HA antibody  
561 (clone 12CA5; Roche, 11 583 816 001, RRID:AB\_514505). Rabbit monoclonal anti-PSTAIR (anti-Cdc2;  
562 Sigma-Aldrich, 06-923, RRID:AB\_310302) was used for loading control. Immunoreactive bands were  
563 revealed, respectively, with anti-mouse (Abcam, ab205719, RRID:AB\_2755049), and anti-rabbit HRP-  
564 conjugated secondary antibodies (Abcam, ab205718, RRID:AB\_2819160), and the ECL system (GE-  
565 Healthcare, RPN2106). For detection of Pak1-GFP and Pak2-3GFP fusions, the TCA-precipitated protein  
566 extracts were resolved in 6% SDS-PAGE gels, transferred to nitrocellulose membranes, and incubated  
567 with a mouse monoclonal anti-GFP antibody (Roche, 11 814 460 001, RRID:AB\_390913), and anti-cdc2  
568 (PSTAIR), as a loading control. To determine For3-3GFP and For3(DAD)-2GFP levels, total protein  
569 extracts from exponentially growing cultures were obtained under native conditions with lysis buffer (20  
570 mM Tris-HCl pH 8.0, 2 mM EDTA, 100 mM NaCl, and 0.5% NP-40, plus a protease inhibitor cocktail).  
571 Proteins were resolved in 6% SDS-PAGE gels and transferred to Hybond-ECL membranes. For3-GFP  
572 fusions were detected with a mouse monoclonal anti-GFP antibody (Roche), with anti-cdc2 (PSTAIR) as

573 a loading control. In all cases the immunoreactive bands were revealed with anti-mouse or anti-rabbit  
574 HRP-conjugated secondary antibodies and the ECL system.

575 To detect Sty1 phosphorylation and total protein levels in strains expressing a genomic Sty1-HA  
576 fusion, cell samples of 5 ml were collected at the indicated times and immediately centrifuged for 20 s at  
577 3200 rpm/4°C. The cell pellets were resuspended in 1 ml of ice-cold buffer (10 mM NaPO<sub>4</sub>, 0.5 mM  
578 EDTA pH 7.5), transferred to 1.5 ml tubes, centrifuged at 13000 rpm/4°C, and stored at 80°C until further  
579 processing. Cell lysis was achieved in a FastPrep instrument after mixing the cell pellets with pre-chilled  
580 0.5 mm glass beads to -20°C with ice-cold lysis buffer (20 mM Tris-HCl pH 8.0, 2 mM EDTA, 100 mM  
581 NaCl, and 0.5% NP-40 and containing a protease inhibitor cocktail) (Sigma Aldrich, P8340). The cell  
582 lysates were clarified by centrifugation at 13000 rpm/4°C for 5 min, and the protein extracts were  
583 resolved in 12% SDS-PAGE gels and transferred to nitrocellulose membranes. Dual phosphorylation of  
584 Sty1 was detected employing a rabbit polyclonal anti-phospho-p38 antibody (Cell Signaling, 9211,  
585 RRID:AB\_331641). Total Sty1 was detected in *S. pombe* extracts with mouse monoclonal anti-HA  
586 antibody (12CA5, Roche). Immunoreactive bands were revealed with anti-mouse or anti-rabbit HRP-  
587 conjugated secondary antibodies (Abcam), and the ECL system.

588 Densitometric quantification of Western blot experiments as of 16-bit. jpg digital images of blots  
589 was performed using ImageJ [75]. The desired bands plus background were drawn as rectangles and a  
590 profile plot (peak) was obtained for each band. To reduce the background noise in the bands, each peak  
591 floating above the baseline of the corresponding peak was manually closed off using the straight-line tool.  
592 Measurement of the closed peaks was performed with the wand tool. Relative Units (R.U.) of For3 levels  
593 were estimated by determining the signal ratio of the correspondent anti-GFP (total For3) blot with  
594 respect to the anti-cdc2 blot (internal control) at each time point. Quantification data correspond to  
595 experiments performed as biological triplicates. Mean relative units  $\pm$  SD are shown.

596

### 597 **Statistical analysis.**

598 Statistical analysis was performed using prism 6 software (Graph pad), and results are represented  
599 as mean  $\pm$  SD, unless otherwise indicated. Comparisons for two groups were calculated using unpaired  
600 two-tailed Student's t-tests, whereas comparisons of more than two groups were calculated using one-way  
601 ANOVA with Bonferroni's multiple comparison tests. We observed normal distribution and no difference  
602 in variance between groups in individual comparisons. Statistical significance: \* p<0.05; \*\* p < 0.005;  
603 \*\*\* p < 0.0005; \*\*\*\* p < 0.0001. Further details on statistical analysis are included in the figure legends.

604

### 605 **Data availability**

606 All data generated or analyzed during this study are included in the manuscript and supporting files.

607

## 608 **References**

- 609 1. Green RA, Paluch E, Oegema K. Cytokinesis in animal cells. *Annu Rev Cell Dev Biol.* 2012;28:29-  
610 58. Epub 20120709. doi: 10.1146/annurev-cellbio-101011-155718. PubMed PMID: 22804577.
- 611 2. Garrido-Casado M, Asensio-Juárez G, Vicente-Manzanares M. Nonmuscle Myosin II Regulation  
612 Directs Its Multiple Roles in Cell Migration and Division. *Annu Rev Cell Dev Biol.* 2021;37:285-310. Epub  
613 20210727. doi: 10.1146/annurev-cellbio-042721-105528. PubMed PMID: 34314591.
- 614 3. Mangione MC, Gould KL. Molecular form and function of the cytokinetic ring. *J Cell Sci.*  
615 2019;132(12). Epub 2019/06/19. doi: 10.1242/jcs.226928. PubMed PMID: 31209062; PubMed Central  
616 PMCID: PMC6602304.
- 617 4. Craig R, Smith R, Kendrick-Jones J. Light-chain phosphorylation controls the conformation of  
618 vertebrate non-muscle and smooth muscle myosin molecules. *Nature.* 1983;302(5907):436-9. doi:  
619 10.1038/302436a0. PubMed PMID: 6687627.
- 620 5. Trybus KM, Lowey S. Conformational states of smooth muscle myosin. Effects of light chain  
621 phosphorylation and ionic strength. *J Biol Chem.* 1984;259(13):8564-71. PubMed PMID: 6610679.
- 622 6. Trybus KM. Filamentous smooth muscle myosin is regulated by phosphorylation. *J Cell Biol.*  
623 1989;109(6 Pt 1):2887-94. doi: 10.1083/jcb.109.6.2887. PubMed PMID: 2531749; PubMed Central  
624 PMCID: PMC2115938.
- 625 7. Komatsu S, Yano T, Shibata M, Tuft RA, Ikebe M. Effects of the regulatory light chain  
626 phosphorylation of myosin II on mitosis and cytokinesis of mammalian cells. *J Biol Chem.*  
627 2000;275(44):34512-20. doi: 10.1074/jbc.M003019200. PubMed PMID: 10944522.
- 628 8. Bao J, Jana SS, Adelstein RS. Vertebrate nonmuscle myosin II isoforms rescue small interfering  
629 RNA-induced defects in COS-7 cell cytokinesis. *J Biol Chem.* 2005;280(20):19594-9. Epub 20050317. doi:  
630 10.1074/jbc.M501573200. PubMed PMID: 15774463.
- 631 9. Ma X, Jana SS, Conti MA, Kawamoto S, Claycomb WC, Adelstein RS. Ablation of nonmuscle  
632 myosin II-B and II-C reveals a role for nonmuscle myosin II in cardiac myocyte karyokinesis. *Mol Biol Cell.*  
633 2010;21(22):3952-62. Epub 20100922. doi: 10.1091/mbc.E10-04-0293. PubMed PMID: 20861308;  
634 PubMed Central PMCID: PMC2982113.
- 635 10. Pollard TD, Wu JQ. Understanding cytokinesis: lessons from fission yeast. *Nat Rev Mol Cell Biol.*  
636 11. England2010. p. 149-55.
- 637 11. Rincon SA, Paoletti A. Molecular control of fission yeast cytokinesis. *Semin Cell Dev Biol.*  
638 2016;53:28-38. Epub 2016/01/26. doi: 10.1016/j.semcdb.2016.01.007. PubMed PMID: 26806637.
- 639 12. Balasubramanian MK, Bi E, Glotzer M. Comparative analysis of cytokinesis in budding yeast,  
640 fission yeast and animal cells. *Curr Biol.* 2004;14(18):R806-18. Epub 2004/09/24. doi:  
641 10.1016/j.cub.2004.09.022. PubMed PMID: 15380095.

- 642 13. Wang K, Okada H, Bi E. Comparative Analysis of the Roles of Non-muscle Myosin-II in  
643 Cytokinesis in Budding Yeast, Fission Yeast, and Mammalian Cells. *Front Cell Dev Biol.* 2020;8:593400.  
644 Epub 20201119. doi: 10.3389/fcell.2020.593400. PubMed PMID: 33330476; PubMed Central PMCID:  
645 PMCPMC7710916.
- 646 14. Laplante C, Berro J, Karatekin E, Hernandez-Leyva A, Lee R, Pollard TD. Three myosins contribute  
647 uniquely to the assembly and constriction of the fission yeast cytokinetic contractile ring. *Curr Biol.*  
648 2015;25(15):1955-65. Epub 20150702. doi: 10.1016/j.cub.2015.06.018. PubMed PMID: 26144970;  
649 PubMed Central PMCID: PMCPMC4526439.
- 650 15. Palani S, Chew TG, Ramanujam S, Kamnev A, Harne S, Chapa YLB, et al. Motor Activity  
651 Dependent and Independent Functions of Myosin II Contribute to Actomyosin Ring Assembly and  
652 Contraction in *Schizosaccharomyces pombe*. *Curr Biol.* 2017;27(5):751-7. Epub 20170223. doi:  
653 10.1016/j.cub.2017.01.028. PubMed PMID: 28238661; PubMed Central PMCID: PMCPMC5344676.
- 654 16. Okada H, Wloka C, Wu JQ, Bi E. Distinct Roles of Myosin-II Isoforms in Cytokinesis under Normal  
655 and Stressed Conditions. *iScience.* 2019;14:69-87. Epub 2019/04/01. doi: 10.1016/j.isci.2019.03.014.  
656 PubMed PMID: 30928696; PubMed Central PMCID: PMCPMC6441717.
- 657 17. Pollard LW, Bookwalter CS, Tang Q, Kremontsova EB, Trybus KM, Lowey S. Fission yeast myosin  
658 Myo2 is down-regulated in actin affinity by light chain phosphorylation. *Proc Natl Acad Sci U S A.*  
659 2017;114(35):E7236-e44. Epub 2017/08/16. doi: 10.1073/pnas.1703161114. PubMed PMID: 28808035;  
660 PubMed Central PMCID: PMCPMC5584420.
- 661 18. Laporte D, Coffman VC, Lee IJ, Wu JQ. Assembly and architecture of precursor nodes during  
662 fission yeast cytokinesis. *J Cell Biol.* 2011;192(6):1005-21. doi: 10.1083/jcb.201008171. PubMed PMID:  
663 21422229; PubMed Central PMCID: PMCPMC3063137.
- 664 19. McDonald NA, Lind AL, Smith SE, Li R, Gould KL. Nanoscale architecture of the  
665 *Schizosaccharomyces pombe* contractile ring. *Elife.* 2017;6. Epub 2017/09/16. doi: 10.7554/eLife.28865.  
666 PubMed PMID: 28914606; PubMed Central PMCID: PMCPMC5779233.
- 667 20. Laplante C, Huang F, Tebbs IR, Bewersdorf J, Pollard TD. Molecular organization of cytokinesis  
668 nodes and contractile rings by super-resolution fluorescence microscopy of live fission yeast. *Proc Natl*  
669 *Acad Sci U S A.* 2016;113(40):E5876-e85. Epub 20160919. doi: 10.1073/pnas.1608252113. PubMed  
670 PMID: 27647921; PubMed Central PMCID: PMCPMC5056082.
- 671 21. Chang F, Drubin D, Nurse P. cdc12p, a protein required for cytokinesis in fission yeast, is a  
672 component of the cell division ring and interacts with profilin. *J Cell Biol.* 1997;137(1):169-82. Epub  
673 1997/04/07. doi: 10.1083/jcb.137.1.169. PubMed PMID: 9105045; PubMed Central PMCID:  
674 PMCPMC2139860.
- 675 22. Kovar DR, Kuhn JR, Tichy AL, Pollard TD. The fission yeast cytokinesis formin Cdc12p is a barbed  
676 end actin filament capping protein gated by profilin. *J Cell Biol.* 2003;161(5):875-87. Epub 2003/06/11.  
677 doi: 10.1083/jcb.200211078. PubMed PMID: 12796476; PubMed Central PMCID: PMCPMC2172974.
- 678 23. Vavylonis D, Wu JQ, Hao S, O'Shaughnessy B, Pollard TD. Assembly mechanism of the contractile  
679 ring for cytokinesis by fission yeast. *Science.* 2008;319(5859):97-100. Epub 20071213. doi:  
680 10.1126/science.1151086. PubMed PMID: 18079366.

- 681 24. Coffman VC, Sees JA, Kovar DR, Wu JQ. The formins Cdc12 and For3 cooperate during contractile  
682 ring assembly in cytokinesis. *J Cell Biol.* 2013;203(1):101-14. Epub 2013/10/16. doi:  
683 10.1083/jcb.201305022. PubMed PMID: 24127216; PubMed Central PMCID: PMC3798249.
- 684 25. Gómez-Gil E, Martín-García R, Vicente-Soler J, Franco A, Vázquez-Marín B, Prieto-Ruiz F, et al.  
685 Stress-activated MAPK signalling controls fission yeast actomyosin ring integrity by modulating formin  
686 For3 levels. *Elife.* 2020;9. Epub 2020/09/12. doi: 10.7554/eLife.57951. PubMed PMID: 32915139.
- 687 26. Willet AH, McDonald NA, Gould KL. Regulation of contractile ring formation and septation in  
688 *Schizosaccharomyces pombe*. *Curr Opin Microbiol.* 2015;28:46-52. Epub 2015/09/05. doi:  
689 10.1016/j.mib.2015.08.001. PubMed PMID: 26340438; PubMed Central PMCID: PMC4688203.
- 690 27. Le Goff X, Motegi F, Salimova E, Mabuchi I, Simanis V. The *S. pombe* *rlc1* gene encodes a  
691 putative myosin regulatory light chain that binds the type II myosins *myo3p* and *myo2p*. *J Cell Sci.*  
692 2000;113 Pt 23:4157-63. PubMed PMID: 11069761.
- 693 28. Naqvi NI, Wong KC, Tang X, Balasubramanian MK. Type II myosin regulatory light chain relieves  
694 auto-inhibition of myosin-heavy-chain function. *Nat Cell Biol.* 2000;2(11):855-8. doi: 10.1038/35041107.  
695 PubMed PMID: 11056543.
- 696 29. McCollum D, Balasubramanian MK, Pelcher LE, Hemmingsen SM, Gould KL.  
697 *Schizosaccharomyces pombe* *cdc4+* gene encodes a novel EF-hand protein essential for cytokinesis. *J*  
698 *Cell Biol.* 1995;130(3):651-60. doi: 10.1083/jcb.130.3.651. PubMed PMID: 7622565; PubMed Central  
699 PMCID: PMC2120525.
- 700 30. Loo TH, Balasubramanian M. *Schizosaccharomyces pombe* Pak-related protein, Pak1p/Orb2p,  
701 phosphorylates myosin regulatory light chain to inhibit cytokinesis. *J Cell Biol.* 2008;183(5):785-93. Epub  
702 20081124. doi: 10.1083/jcb.200806127. PubMed PMID: 19029336; PubMed Central PMCID:  
703 PMC2592837.
- 704 31. Chew TL, Masaracchia RA, Goeckeler ZM, Wysolmerski RB. Phosphorylation of non-muscle  
705 myosin II regulatory light chain by p21-activated kinase ( $\gamma$ -PAK). *J Muscle Res Cell Motil.*  
706 1998;19(8):839-54. doi: 10.1023/a:1005417926585. PubMed PMID: 10047984.
- 707 32. Magliozzi JO, Sears J, Cressey L, Brady M, Opalko HE, Kettenbach AN, et al. Fission yeast Pak1  
708 phosphorylates anillin-like Mid1 for spatial control of cytokinesis. *J Cell Biol.* 2020;219(8). Epub  
709 2020/05/19. doi: 10.1083/jcb.201908017. PubMed PMID: 32421151; PubMed Central PMCID:  
710 PMC7401808.
- 711 33. Sladewski TE, Previs MJ, Lord M. Regulation of fission yeast myosin-II function and contractile  
712 ring dynamics by regulatory light-chain and heavy-chain phosphorylation. *Mol Biol Cell.*  
713 2009;20(17):3941-52. Epub 20090701. doi: 10.1091/mbc.e09-04-0346. PubMed PMID: 19570908;  
714 PubMed Central PMCID: PMC2735492.
- 715 34. Stark BC, Sladewski TE, Pollard LW, Lord M. Tropomyosin and myosin-II cellular levels promote  
716 actomyosin ring assembly in fission yeast. *Mol Biol Cell.* 2010;21(6):989-1000. Epub 20100128. doi:  
717 10.1091/mbc.e09-10-0852. PubMed PMID: 20110347; PubMed Central PMCID: PMC2836979.
- 718 35. Aoi Y, Kawashima SA, Simanis V, Yamamoto M, Sato M. Optimization of the analogue-sensitive  
719 Cdc2/Cdk1 mutant by in vivo selection eliminates physiological limitations to its use in cell cycle analysis.

- 720 Open Biol. 2014;4(7). Epub 2014/07/06. doi: 10.1098/rsob.140063. PubMed PMID: 24990387; PubMed  
721 Central PMCID: PMCPMC4118601.
- 722 36. Malecki M, Bitton DA, Rodríguez-López M, Rallis C, Calavia NG, Smith GC, et al. Functional and  
723 regulatory profiling of energy metabolism in fission yeast. *Genome Biol.* 2016;17(1):240. Epub  
724 20161125. doi: 10.1186/s13059-016-1101-2. PubMed PMID: 27887640; PubMed Central PMCID:  
725 PMCPMC5124322.
- 726 37. Ohira MJ, Hendrickson DG, Scott Mclsaac R, Rhind N. An estradiol-inducible promoter enables  
727 fast, graduated control of gene expression in fission yeast. *Yeast.* 2017;34(8):323-34. Epub 2017/04/20.  
728 doi: 10.1002/yea.3235. PubMed PMID: 28423198; PubMed Central PMCID: PMCPMC5542879.
- 729 38. Sells MA, Barratt JT, Caviston J, Otilie S, Leberer E, Chernoff J. Characterization of Pak2p, a  
730 pleckstrin homology domain-containing, p21-activated protein kinase from fission yeast. *J Biol Chem.*  
731 1998;273(29):18490-8. doi: 10.1074/jbc.273.29.18490. PubMed PMID: 9660818.
- 732 39. Yang P, Kansra S, Pimental RA, Gilbreth M, Marcus S. Cloning and characterization of shk2, a  
733 gene encoding a novel p21-activated protein kinase from fission yeast. *J Biol Chem.* 1998;273(29):18481-  
734 9. doi: 10.1074/jbc.273.29.18481. PubMed PMID: 9660817.
- 735 40. Mata J, Bähler J. Global roles of Ste11p, cell type, and pheromone in the control of gene  
736 expression during early sexual differentiation in fission yeast. *Proc Natl Acad Sci U S A.*  
737 2006;103(42):15517-22. Epub 20061009. doi: 10.1073/pnas.0603403103. PubMed PMID: 17032641;  
738 PubMed Central PMCID: PMCPMC1592531.
- 739 41. Vještica A, Merlini L, Nkosi PJ, Martin SG. Gamete fusion triggers bipartite transcription factor  
740 assembly to block re-fertilization. *Nature.* 2018;560(7718):397-400. Epub 20180808. doi:  
741 10.1038/s41586-018-0407-5. PubMed PMID: 30089908.
- 742 42. Sugimoto A, Iino Y, Maeda T, Watanabe Y, Yamamoto M. *Schizosaccharomyces pombe* ste11+  
743 encodes a transcription factor with an HMG motif that is a critical regulator of sexual development.  
744 *Genes Dev.* 1991;5(11):1990-9. doi: 10.1101/gad.5.11.1990. PubMed PMID: 1657709.
- 745 43. Kunitomo H, Higuchi T, Iino Y, Yamamoto M. A zinc-finger protein, Rst2p, regulates transcription  
746 of the fission yeast ste11(+) gene, which encodes a pivotal transcription factor for sexual development.  
747 *Mol Biol Cell.* 2000;11(9):3205-17. Epub 2000/09/12. doi: 10.1091/mbc.11.9.3205. PubMed PMID:  
748 10982411; PubMed Central PMCID: PMCPMC14986.
- 749 44. Madrid M, Soto T, Franco A, Paredes V, Vicente J, Hidalgo E, et al. A cooperative role for Atf1  
750 and Pap1 in the detoxification of the oxidative stress induced by glucose deprivation in  
751 *Schizosaccharomyces pombe*. *Journal of Biological Chemistry.* 2004;279(40):41594-602. doi:  
752 10.1074/jbc.M405509200. PubMed PMID: WOS:000224075500044.
- 753 45. Berg S, Kutra D, Kroeger T, Straehle CN, Kausler BX, Haubold C, et al. ilastik: interactive machine  
754 learning for (bio)image analysis. *Nat Methods.* 2019;16(12):1226-32. Epub 20190930. doi:  
755 10.1038/s41592-019-0582-9. PubMed PMID: 31570887.
- 756 46. Martin SG, Rincon SA, Basu R, Perez P, Chang F. Regulation of the formin for3p by cdc42p and  
757 bud6p. *Mol Biol Cell.* 2007;18(10):4155-67. Epub 2007/08/19. doi: 10.1091/mbc.e07-02-0094. PubMed  
758 PMID: 17699595; PubMed Central PMCID: PMCPMC1995706.

- 759 47. Perez P, Cansado J. Cell Integrity Signaling and Response to Stress in Fission Yeast. *Current*  
760 *Protein & Peptide Science*. 2010;11(8):680-92. doi: 10.2174/138920310794557718. PubMed PMID:  
761 WOS:000287357000005.
- 762 48. Alonso-Matilla R, Thiyagarajan S, O'Shaughnessy B. Sliding filament and fixed filament  
763 mechanisms contribute to ring tension in the cytokinetic contractile ring. *Cytoskeleton* (Hoboken).  
764 2019;76(11-12):611-25. Epub 2019/08/24. doi: 10.1002/cm.21558. PubMed PMID: 31443136.
- 765 49. Farrugia G, Balzan R. Oxidative stress and programmed cell death in yeast. *Front Oncol*.  
766 2012;2:64. Epub 20120620. doi: 10.3389/fonc.2012.00064. PubMed PMID: 22737670; PubMed Central  
767 PMCID: PMC3380282.
- 768 50. Zuin A, Gabrielli N, Calvo IA, García-Santamarina S, Hoe KL, Kim DU, et al. Mitochondrial  
769 dysfunction increases oxidative stress and decreases chronological life span in fission yeast. *PLoS One*.  
770 2008;3(7):e2842. Epub 2008/07/31. doi: 10.1371/journal.pone.0002842. PubMed PMID: 18665268;  
771 PubMed Central PMCID: PMC3380282.
- 772 51. Zuin A, Castellano-Esteve D, Ayté J, Hidalgo E. Living on the edge: stress and activation of stress  
773 responses promote lifespan extension. *Aging* (Albany NY). 2010;2(4):231-7. doi: 10.18632/aging.100133.  
774 PubMed PMID: 20453258; PubMed Central PMCID: PMC3380282.
- 775 52. Yuan CC, Muthu P, Kazmierczak K, Liang J, Huang W, Irving TC, et al. Constitutive  
776 phosphorylation of cardiac myosin regulatory light chain prevents development of hypertrophic  
777 cardiomyopathy in mice. *Proc Natl Acad Sci U S A*. 2015;112(30):E4138-46. Epub 20150629. doi:  
778 10.1073/pnas.1505819112. PubMed PMID: 26124132; PubMed Central PMCID: PMC3380282.
- 779 53. Markandran K, Poh JW, Ferenczi MA, Cheung C. Regulatory Light Chains in Cardiac Development  
780 and Disease. *Int J Mol Sci*. 2021;22(9). Epub 20210421. doi: 10.3390/ijms22094351. PubMed PMID:  
781 33919432; PubMed Central PMCID: PMC3380282.
- 782 54. Jordan P, Karess R. Myosin light chain-activating phosphorylation sites are required for  
783 oogenesis in *Drosophila*. *J Cell Biol*. 1997;139(7):1805-19. doi: 10.1083/jcb.139.7.1805. PubMed PMID:  
784 9412474; PubMed Central PMCID: PMC3380282.
- 785 55. Ostrow BD, Chen P, Chisholm RL. Expression of a myosin regulatory light chain phosphorylation  
786 site mutant complements the cytokinesis and developmental defects of *Dictyostelium* RMLC null cells. *J*  
787 *Cell Biol*. 1994;127(6 Pt 2):1945-55. doi: 10.1083/jcb.127.6.1945. PubMed PMID: 7806572; PubMed  
788 Central PMCID: PMC3380282.
- 789 56. Malina C, Yu R, Björkeröth J, Kerkhoven EJ, Nielsen J. Adaptations in metabolism and protein  
790 translation give rise to the Crabtree effect in yeast. *Proc Natl Acad Sci U S A*. 2021;118(51). Epub  
791 2021/12/15. doi: 10.1073/pnas.2112836118. PubMed PMID: 34903663.
- 792 57. Zambon P, Palani S, Kamnev A, Balasubramanian MK. Myo2p is the major motor involved in  
793 actomyosin ring contraction in fission yeast. *Curr Biol*. 2017;27(3):R99-r100. doi:  
794 10.1016/j.cub.2016.12.024. PubMed PMID: 28171765; PubMed Central PMCID: PMC3380282.
- 795 58. Cao LG, Wang YL. Mechanism of the formation of contractile ring in dividing cultured animal  
796 cells. I. Recruitment of preexisting actin filaments into the cleavage furrow. *J Cell Biol*. 1990;110(4):1089-  
797 95. doi: 10.1083/jcb.110.4.1089. PubMed PMID: 2324193; PubMed Central PMCID: PMC3380282.



- 798 59. Khaliullin RN, Green RA, Shi LZ, Gomez-Cavazos JS, Berns MW, Desai A, et al. A positive-  
799 feedback-based mechanism for constriction rate acceleration during cytokinesis in *Caenorhabditis*  
800 *elegans*. *Elife*. 2018;7. Epub 20180702. doi: 10.7554/eLife.36073. PubMed PMID: 29963981; PubMed  
801 Central PMCID: PMC6063732.
- 802 60. White JG, Borisy GG. On the mechanisms of cytokinesis in animal cells. *J Theor Biol*.  
803 1983;101(2):289-316. doi: 10.1016/0022-5193(83)90342-9. PubMed PMID: 6683772.
- 804 61. Huang J, Huang Y, Yu H, Subramanian D, Padmanabhan A, Thadani R, et al. Nonmedially  
805 assembled F-actin cables incorporate into the actomyosin ring in fission yeast. *J Cell Biol*.  
806 2012;199(5):831-47. Epub 2012/11/28. doi: 10.1083/jcb.201209044. PubMed PMID: 23185032; PubMed  
807 Central PMCID: PMC3514790.
- 808 62. Pelham RJ, Chang F. Actin dynamics in the contractile ring during cytokinesis in fission yeast.  
809 *Nature*. 2002;419(6902):82-6. doi: 10.1038/nature00999. PubMed PMID: 12214236.
- 810 63. Madrid M, Gómez-Gil E, Cansado J. Negative control of cytokinesis by stress-activated MAPK  
811 signaling. *Curr Genet*. 2021;67(5):715-21. Epub 20210331. doi: 10.1007/s00294-021-01155-6. PubMed  
812 PMID: 33791858.
- 813 64. Malla M, Pollard TD, Chen Q. Counting actin in contractile rings reveals novel contributions of  
814 cofilin and type II myosins to fission yeast cytokinesis. *Mol Biol Cell*. 2021:mbcE21080376. Epub  
815 20211006. doi: 10.1091/mbc.E21-08-0376. PubMed PMID: 34613787.
- 816 65. Bays JL, Campbell HK, Heidema C, Sebbagh M, DeMali KA. Linking E-cadherin  
817 mechanotransduction to cell metabolism through force-mediated activation of AMPK. *Nat Cell Biol*.  
818 2017;19(6):724-31. Epub 20170529. doi: 10.1038/ncb3537. PubMed PMID: 28553939; PubMed Central  
819 PMCID: PMC5494977.
- 820 66. Shiraishi T, Verdone JE, Huang J, Kahlert UD, Hernandez JR, Torga G, et al. Glycolysis is the  
821 primary bioenergetic pathway for cell motility and cytoskeletal remodeling in human prostate and  
822 breast cancer cells. *Oncotarget*. 2015;6(1):130-43. doi: 10.18632/oncotarget.2766. PubMed PMID:  
823 25426557; PubMed Central PMCID: PMC4381583.
- 824 67. DeWane G, Salvi AM, DeMali KA. Fueling the cytoskeleton - links between cell metabolism and  
825 actin remodeling. *J Cell Sci*. 2021;134(3). Epub 20210208. doi: 10.1242/jcs.248385. PubMed PMID:  
826 33558441; PubMed Central PMCID: PMC7888749.
- 827 68. Kim DU, Hayles J, Kim D, Wood V, Park HO, Won M, et al. Analysis of a genome-wide set of gene  
828 deletions in the fission yeast *Schizosaccharomyces pombe*. *Nat Biotechnol*. 2010;28(6):617-23. Epub  
829 20100516. doi: 10.1038/nbt.1628. PubMed PMID: 20473289; PubMed Central PMCID:  
830 PMC3962850.
- 831 69. Hentges P, Van Driessche B, Tafforeau L, Vandenhoute J, Carr AM. Three novel antibiotic marker  
832 cassettes for gene disruption and marker switching in *Schizosaccharomyces pombe*. *Yeast*.  
833 2005;22(13):1013-9. doi: 10.1002/yea.1291. PubMed PMID: 16200533.
- 834 70. Sato M, Dhut S, Toda T. New drug-resistant cassettes for gene disruption and epitope tagging in  
835 *Schizosaccharomyces pombe*. *Yeast*. 2005;22(7):583-91. Epub 2005/06/09. doi: 10.1002/yea.1233.  
836 PubMed PMID: 15942936.

- 837 71. Petersen J, Russell P. Growth and the Environment of *Schizosaccharomyces pombe*. Cold Spring  
838 Harb Protoc. 2016;2016(3):pdb.top079764. Epub 2016/03/05. doi: 10.1101/pdb.top079764. PubMed  
839 PMID: 26933253; PubMed Central PMCID: PMC5526333.
- 840 72. Keeney JB, Boeke JD. Efficient targeted integration at *leu1-32* and *ura4-294* in  
841 *Schizosaccharomyces pombe*. Genetics. 1994;136(3):849-56. doi: 10.1093/genetics/136.3.849. PubMed  
842 PMID: 8005439; PubMed Central PMCID: PMC1205890.
- 843 73. Prieto-Ruiz F, Vicente-Soler J, Franco A, Gomez-Gil E, Sanchez-Marinas M, Vazquez-Marin B, et  
844 al. RNA-Binding Protein Rnc1 Regulates Cell Length at Division and Acute Stress Response in Fission  
845 Yeast through Negative Feedback Modulation of the Stress-Activated Mitogen-Activated Protein Kinase  
846 Pathway. mBio. 2020;11(1). Epub 2020/01/09. doi: 10.1128/mBio.02815-19. PubMed PMID: 31911490;  
847 PubMed Central PMCID: PMC6946801.
- 848 74. Moreno S, Klar A, Nurse P. Molecular Genetic-Analysis Of Fission Yeast *Schizosaccharomyces*  
849 *pombe*. Methods in Enzymology. 1991;194:795-823. PubMed PMID: WOS:A1991FN84200056.
- 850 75. Schneider C, Rasband W, Eliceiri K. NIH Image to ImageJ: 25 years of image analysis. Nature  
851 Methods. 2012;9(7):671-5. doi: 10.1038/nmeth.2089. PubMed PMID: WOS:000305942200020.
- 852 76. Grallert A, Hagan IM. Preparation of Protein Extracts from *Schizosaccharomyces pombe* Using  
853 Trichloroacetic Acid Precipitation. Cold Spring Harb Protoc. 2017;2017(2). Epub 2017/02/01. doi:  
854 10.1101/pdb.prot091579. PubMed PMID: 28148851.
- 855

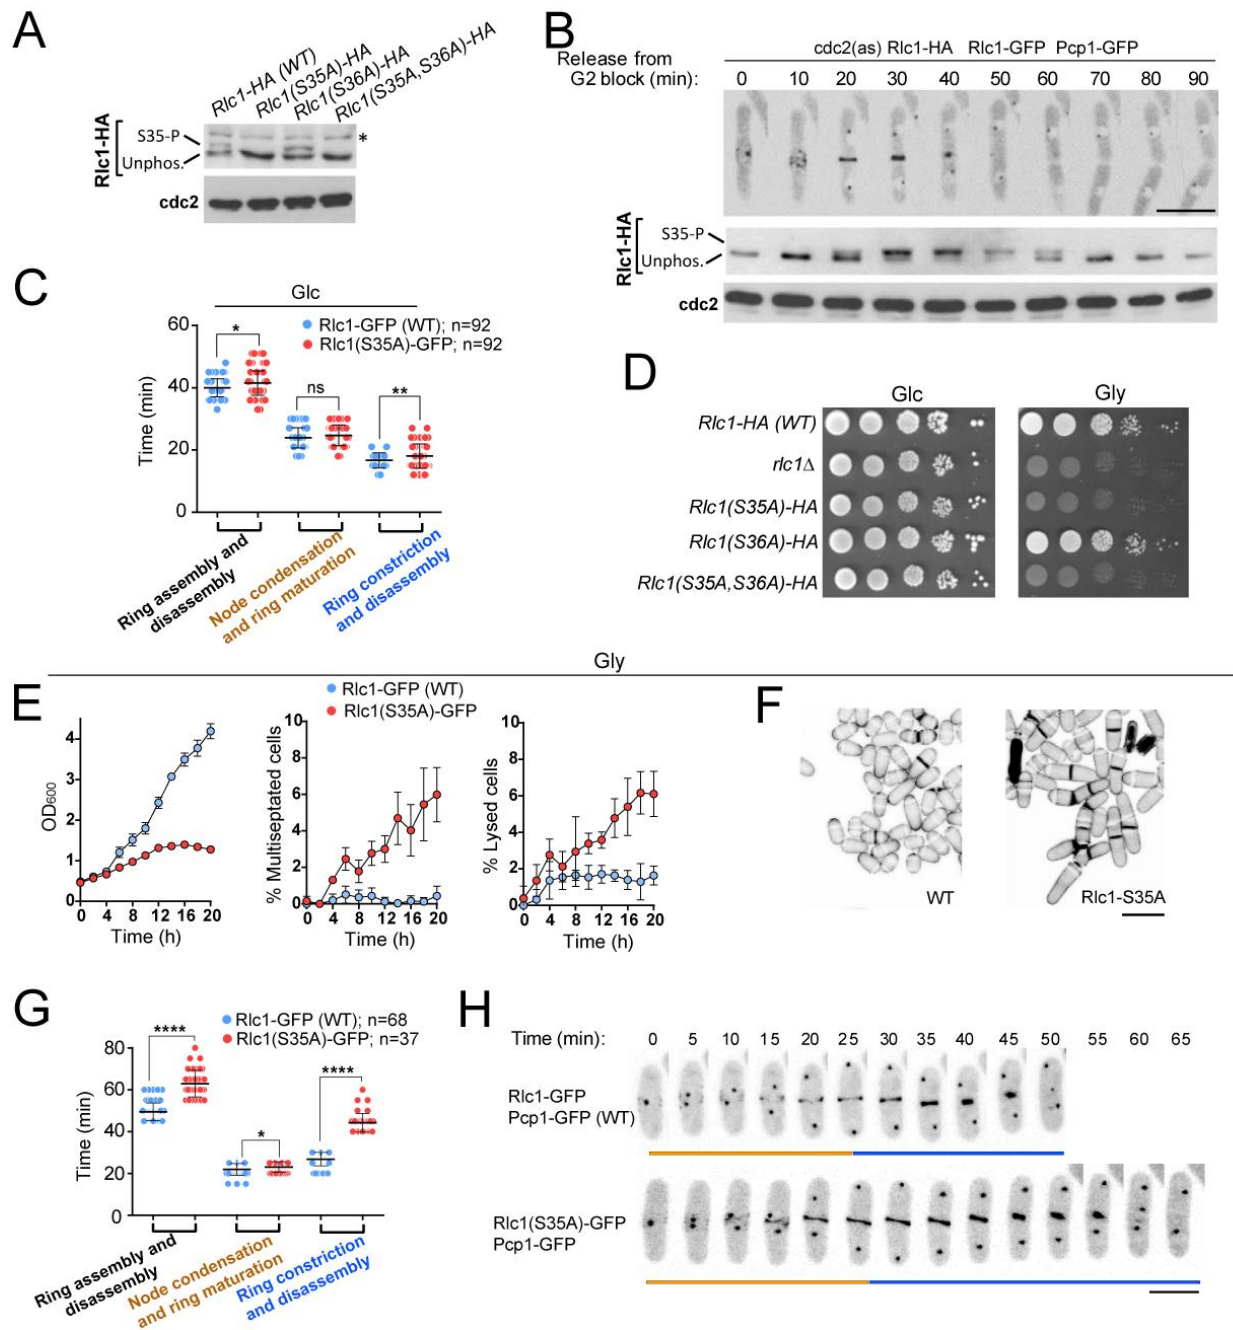

856

857 **Figure 1. Myosin-II regulatory light chain phosphorylation is essential for *S. pombe* cytokinesis and**  
 858 **growth during respiration.**

859 (A) Total protein extracts from the indicated strains growing exponentially in YES-Glucose medium were  
 860 resolved by SDS-PAGE, and the Rlc1-HA fusion was detected by incubation with anti-HA antibody.

861 Anti-Cdc2 was used as a loading control. Rlc1 isoforms, phosphorylated (S35-P), and not phosphorylated  
 862 at Ser35 (Unphos), are indicated. The blot corresponds to a representative experiment that was repeated at

863 least three times with identical results. (B) Cells with *cdc2-asM17* analog-sensitive mutant allele co-

864 expressing Rlc1-HA and Rlc1-GFP genomic fusions were arrested at G2 in YES-Glucose medium  
865 supplemented with 3-NM-PP1 and incubated in the same medium lacking the kinase analogue for the  
866 indicated times. Time-lapse images of a representative cell showing Rlc1-GFP localization and mitotic  
867 progression monitored using Pcp1-GFP marked SPBs (upper panel) (scale bar: 10  $\mu$ m), and Western blot  
868 analysis of Rlc1-HA mobility after release from the G2 block (lower panels), are shown. The Western  
869 blot image corresponds to a representative experiment that was repeated at least three times with identical  
870 results. (C) Times for ring assembly and disassembly, node condensation/ring maturation, and ring  
871 constriction and disassembly were estimated for the indicated strains growing exponentially in YES-  
872 Glucose medium (Glc), by time-lapse confocal fluorescence microscopy. *n* is the total number of cells  
873 scored from three independent experiments, and data are presented as mean  $\pm$  SD. Statistical comparison  
874 between two groups was performed by unpaired Student's *t*-test. \*\*,  $p < 0.005$ ; \*,  $p < 0.05$ ; ns, not  
875 significant, as calculated by unpaired Student's *t* test. (D) Decimal dilutions of strains of the indicated  
876 genotypes were spotted on solid plates with YES-Glucose (Glc), or YES-Glycerol (Gly), incubated at  
877 30°C for 3 (glucose plates) or 5 days (glycerol plates), and photographed. The image corresponds to a  
878 representative experiment that was repeated at least three times with similar results. (E) The indicated  
879 strains were grown in YES-Glucose to a final OD<sub>600</sub>=0.2 and shifted to YES-Glycerol and incubated at  
880 28°C. The OD<sub>600</sub> value, and the percentage of multiseptated and lysed cells were quantified in aliquots  
881 taken at the indicated times. Data correspond to three independent growth curves and are presented as  
882 mean  $\pm$  SD. (F) Representative maximum projection confocal images of cells growing for 12 h in YES-  
883 Glycerol after cell-wall staining with calcofluor white. Scale bar: 10  $\mu$ m (G) The times for total ring  
884 assembly and disassembly, node condensation/ring maturation, and ring constriction were estimated for  
885 the indicated strains cells growing exponentially in YES-Glycerol medium by time-lapse confocal  
886 fluorescence microscopy. Mitotic progression was monitored using Pcp1-GFP-marked SPBs. *n* is the total  
887 number of cells scored from three independent experiments, and data are presented as mean  $\pm$  SD.  
888 Statistical comparison between two groups was performed by unpaired Student's *t*-test. \*\*\*\*,  $p < 0.0001$ ;  
889 \*,  $p < 0.05$ , as calculated by unpaired Student's *t*-test. (H) Representative maximum-projection time-lapse  
890 images of Rlc1 dynamics at the equatorial region of cells growing YES-Glycerol. Mitotic progression was  
891 monitored using Pcp1-GFP-marked SPBs. Time interval is 5 min. Scale bar: 10  $\mu$ m.  
892

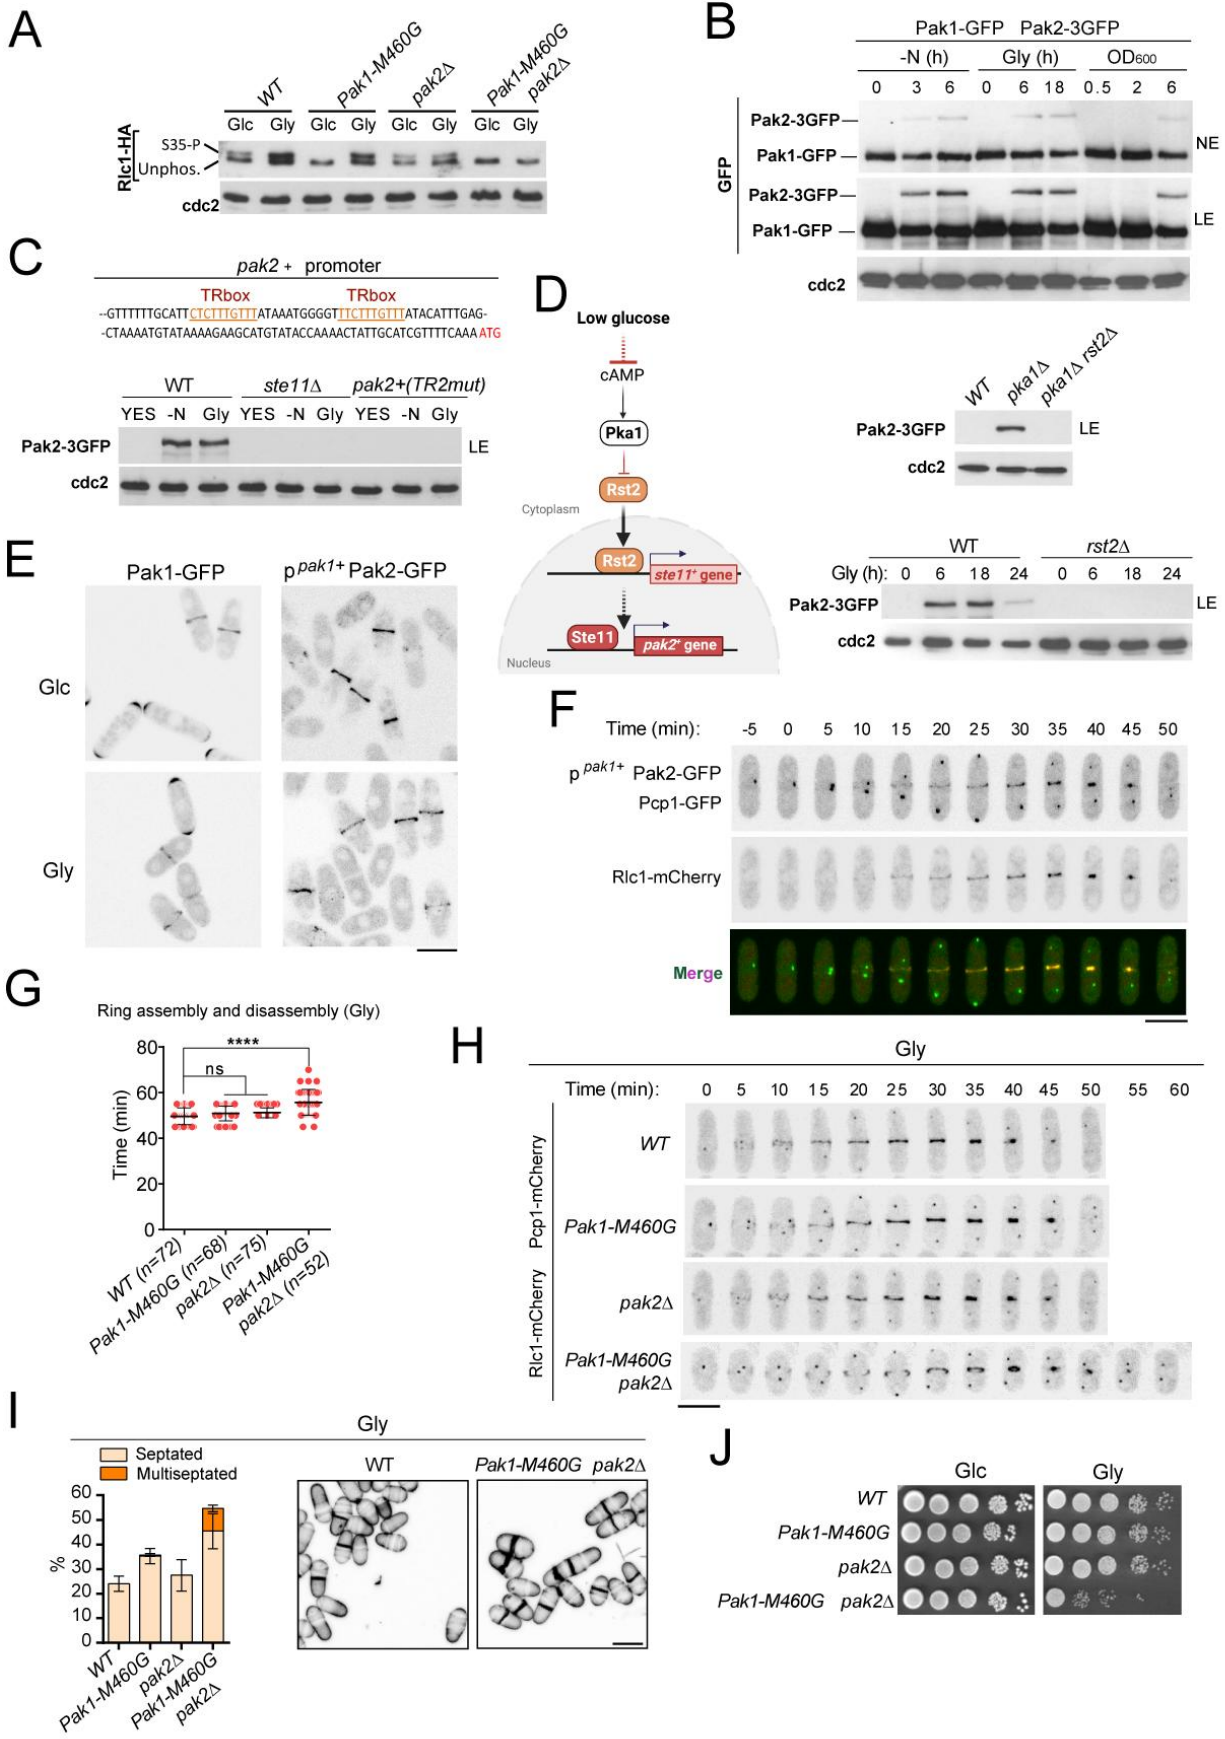

893 **Figure 2. p21/Cdc42-activated kinase Pak2 phosphorylates Rlc1 at Ser35 together with Pak1 to**

894 **positively control fission yeast cytokinesis and division during respiratory growth.**

895 (A) Total protein extracts from strains of the indicated genotypes growing exponentially in YES-Glucose  
896 (Glc) or YES-Glycerol (Gly), were resolved by SDS-PAGE, and the Rlc1-HA fusion was detected by  
897 incubation with anti-HA antibody. Anti-Cdc2 was used as a loading control. Rlc1 isoforms,  
898 phosphorylated (S35-P), and not phosphorylated at Ser35 (Unphos), are indicated. The image corresponds  
899 to a representative experiment that was repeated at least three times with similar results. (B) Glucose-  
900 growing cells of a *S. pombe* strain co-expressing Pak1-GFP and Pak2-3GFP genomic fusions were  
901 starved from nitrogen (-N), incubated in YES-Glycerol for the indicated times, or incubated in YES-  
902 Glucose medium until reaching the indicated OD<sub>600</sub> values. The corresponding total protein extracts were  
903 resolved by SDS-PAGE, and Pak1-GFP and Pak2-3GFP fusions were detected by incubation with anti-  
904 GFP antibody. Anti-Cdc2 was used as a loading control. The image corresponds to a representative  
905 experiment that was repeated at least three times with identical results. NE: bands observed after 5 min  
906 film exposure. LE: immunoreactive bands observed after an extended film exposure of 25 min. (C)  
907 Upper: Partial nucleotide sequence of the promoter region of the *pak2*<sup>+</sup> gene. The two putative TR boxes  
908 (Ste11-binding motifs) are shown in color. Lower: Western blot analysis of Pak2-3GFP levels in wild-  
909 type, *ste11Δ*, and a mutant strain where the conserved G in the two putative TR boxes in the promoter of  
910 *pak2*<sup>+</sup> gene was replaced by A, growing in YES-Glucose, after nitrogen starvation (-N), and a shift to  
911 YES-Glycerol (Gly) for 12 h. Pak2-3GFP was detected by incubation with anti-GFP antibody, while anti-  
912 Cdc2 was used as a loading control. The image corresponds to a representative experiment that was  
913 repeated at least three times with identical results. (D) Left: Pak2 expression increases specifically during  
914 respiratory growth in a Rst2- and Ste11-dependent manner in absence of cAMP-PKA signaling. See text  
915 for a detailed description of its main components and functions. Upper right: total protein extracts from  
916 strains of the indicated genotypes growing exponentially in YES-Glucose were resolved by SDS-PAGE,  
917 and the Pak2-3GFP fusion was detected by incubation with anti-GFP antibody. Anti-Cdc2 was used as a  
918 loading control. The image corresponds to a representative experiment that was repeated at least three  
919 times with identical results. Lower right: total protein extracts from strains growing exponentially in  
920 YES-Glycerol (Gly) for the indicated times were resolved by SDS-PAGE, and the Pak2-3GFP fusion was  
921 detected by incubation with anti-GFP antibody. Anti-Cdc2 was used as a loading control. The image  
922 corresponds to a representative experiment that was repeated at least three times with identical results. (E)  
923 Representative maximum projection confocal images of exponentially growing cells from Pak1-GFP and  
924 p<sup>*pak1*+</sup>-Pak2-GFP cells growing exponentially in YES-Glucose (Glc), or YES-Glycerol (Gly). (F)  
925 Representative maximum-projection time-lapse images of Pak2 and Rlc1 dynamics at the CAR in cells  
926 co-expressing p<sup>*pak1*+</sup>-Pak2-GFP and Rlc1-mCherry genomic fusions and growing in YES-Glycerol.

927 Mitotic progression was monitored using Pcp1-GFP-marked SPBs. Time interval is 5 min. **(G)** The total  
928 time for ring assembly and disassembly was estimated for the indicated strains growing exponentially in  
929 YES-Glycerol medium by time-lapse confocal fluorescence microscopy. Mitotic progression was  
930 monitored using Pcp1-GFP-marked SPBs. *n* is the total number of cells scored from three independent  
931 experiments, and data are presented as mean  $\pm$  SD. Statistical comparison between groups was performed  
932 by one-way ANOVA. \*\*\*\*,  $p < 0.0001$ ; ns, not significant. **(H)** Representative maximum-projection time-  
933 lapse images of Rlc1 dynamics at the equatorial region in cells growing YES-Glycerol. Mitotic  
934 progression was monitored using Pcp1-GFP-marked SPBs. Time interval is 5 min. Scale bar: 10  $\mu$ m. **(I)**  
935 Left: strains were grown in YES-Glycerol for 12 h, and the percentage of septated and multiseptated cells  
936 were quantified. Data correspond to three independent experiments, and are presented as mean  $\pm$  SD.  
937 Right: representative maximum projection confocal images of cells from the indicated strains after cell-  
938 wall staining with calcofluor white. **(J)** Decimal dilutions of strains of the indicated genotypes were  
939 spotted on plates with YES-Glucose or YES-Glycerol, incubated at 30°C or 5 days, and photographed.  
940 The image corresponds to a representative experiment that was repeated at least three times with similar  
941 results.

942

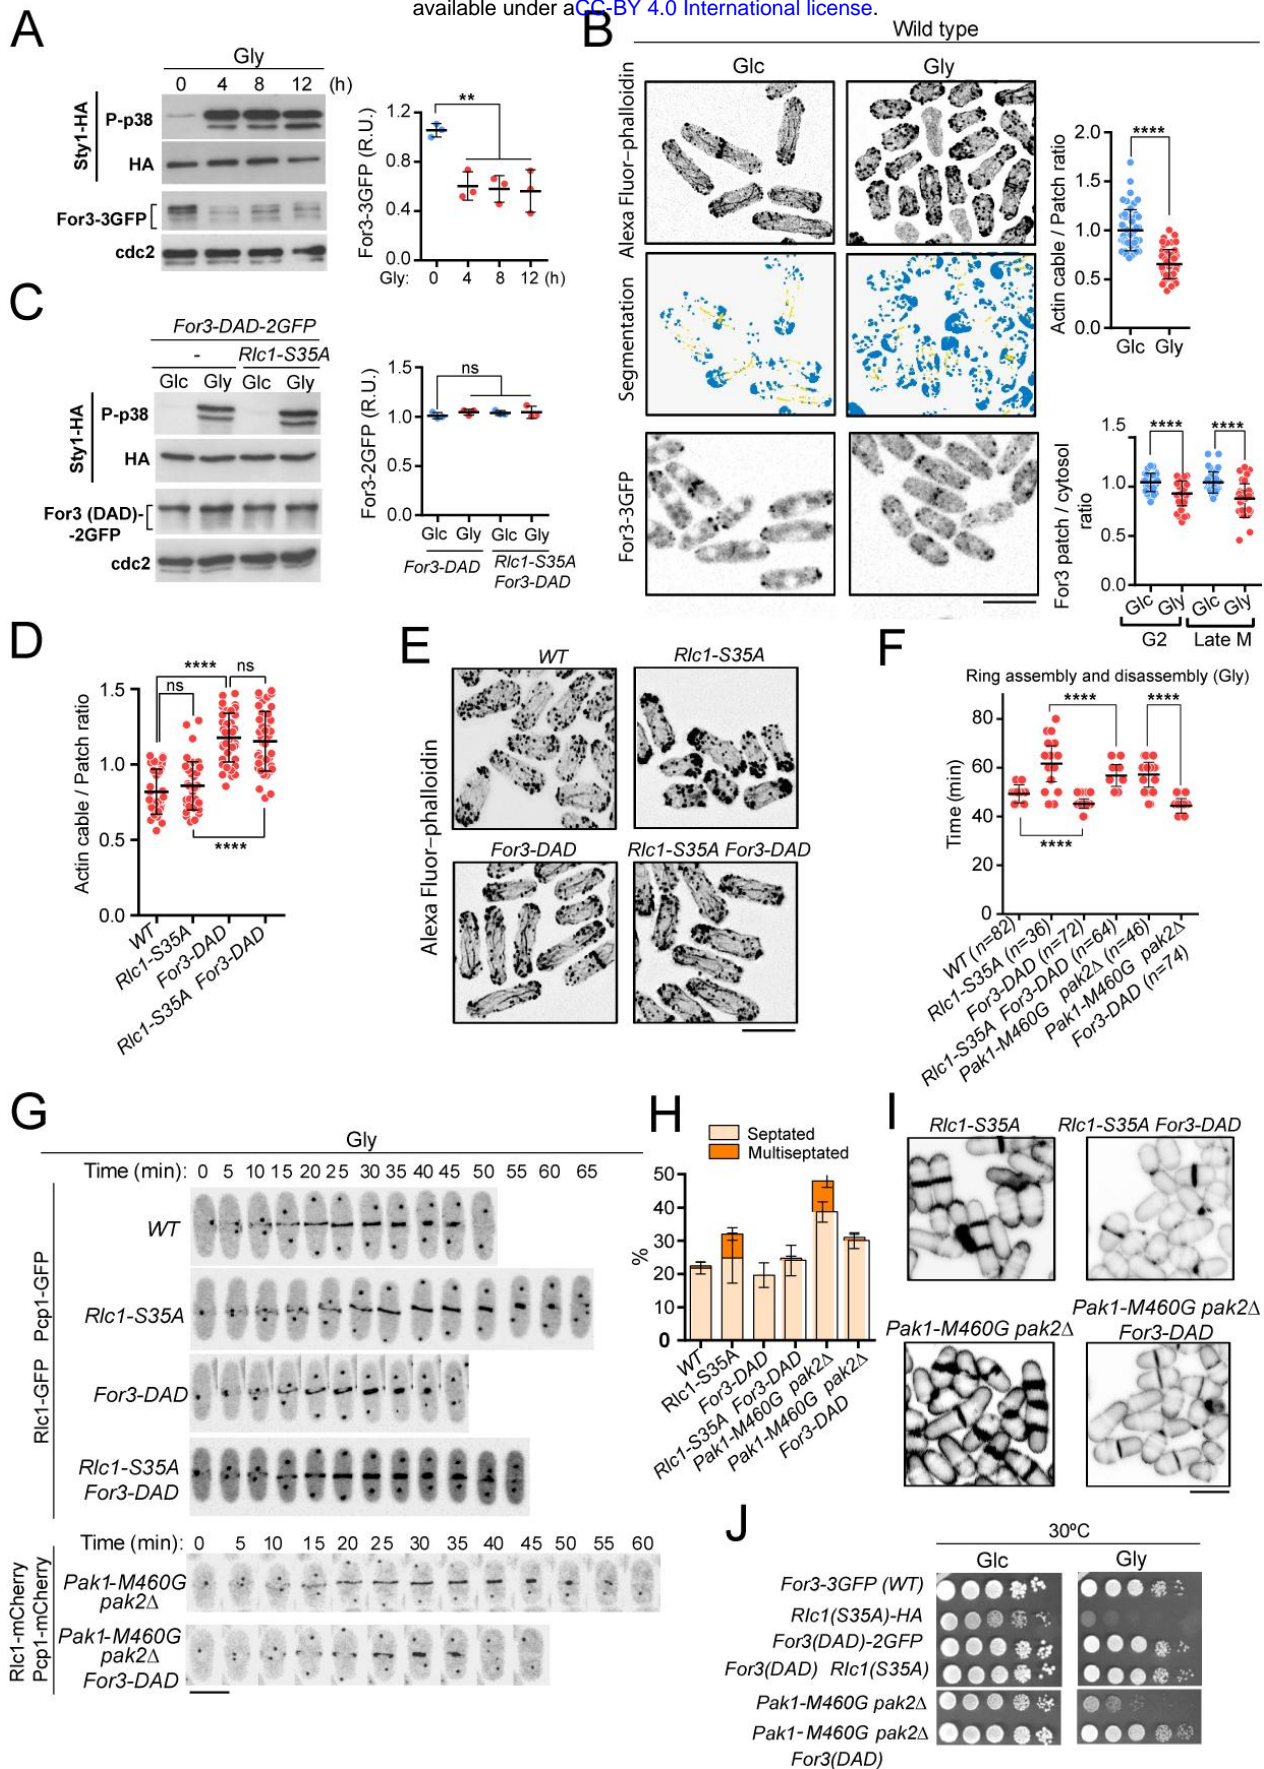

943 **Figure 3. PAK phosphorylation of Rlc1 is critical for *S. pombe* cytokinesis during respiration due to**



944 **impaired For3-dependent actin cable nucleation imposed by SAPK activation.**

945 (A) Left: *S. pombe* cells expressing genomic Sty1-HA and For3-3GFP fusions were grown in YES-  
946 Glucose to mid-log phase and transferred to YES-Glycerol medium for the indicated times.  
947 Activated/total Sty1 were detected with anti-phospho-p38 and anti-HA antibodies, respectively. Total  
948 For3 levels were detected with anti-GFP antibody. Anti-Cdc2 was used as a loading control. Right: For3  
949 expression levels are represented as mean relative units  $\pm$  SD and correspond to experiments performed as  
950 biological triplicates. \*\*,  $p < 0.005$ , as calculated by unpaired Student's *t*-test. (B) Upper: representative  
951 maximum projection images of Alexa Fluor-phalloidin stained *S. pombe* cells growing in YES-Glucose  
952 medium (Glc), or in YES-Glycerol (Gly) for 12 h. Segmentation analysis with Ilastik routine is shown  
953 below each image. Quantification data correspond to the actin cable to patch ratio of G2 cells ( $n=51$ )  
954 growing with Glucose or Glycerol, and are represented as mean relative units  $\pm$  SD. \*\*\*\*,  $p < 0.0001$ , as  
955 calculated by unpaired Student's *t*-test. Lower: representative maximum projection images of *S. pombe*  
956 cells expressing a genomic For3-3GFP fusion growing in YES-Glucose medium or in YES-Glycerol for  
957 12 h. Quantification data (mean relative units  $\pm$  SD), correspond to the For3 patch to cytosol ratio of G2  
958 and late M cells ( $n=36$ ), growing with Glucose or Glycerol. \*\*\*\*,  $p < 0.0001$ , as calculated by unpaired  
959 Student's *t*-test. Scale bar: 10  $\mu\text{m}$ . (C) Left: *S. pombe* wild-type and *rlc1-S35A* strains expressing genomic  
960 Sty1-HA and For3 (DAD)-2GFP fusions were grown in YES-Glucose (Glc) to mid-log phase and  
961 transferred to YES-Glycerol medium (Gly) for 12 h. Activated/total Sty1 were detected with anti-  
962 phospho-p38 and anti-HA antibodies, respectively. Total For3 levels were detected with anti-GFP  
963 antibody. Anti-Cdc2 was used as a loading control. Right: For3 expression levels are represented as  
964 mean relative units  $\pm$  SD and correspond to experiments performed as biological triplicates. ns, not  
965 significant, as calculated by unpaired Student's *t*-test. (D) Actin cable to patch ratio of G2 cells from the  
966 indicated strains growing in YES-Glycerol medium for 12 h. Quantification data ( $n=41$  cells for each  
967 strain), are represented as mean relative units  $\pm$  SD. \*\*\*\*,  $p < 0.0001$ ; ns, not significant, as calculated by  
968 unpaired Student's *t*-test. (E) Representative maximum projection images of Alexa Fluor-phalloidin  
969 stained *S. pombe* cells of the indicated strains growing in YES-Glycerol medium for 12 h. (F) The total  
970 time for ring assembly and disassembly was estimated for the indicated strains growing exponentially in  
971 YES-Glycerol medium by time-lapse confocal fluorescence microscopy. *n* is the total number of cells  
972 scored from three independent experiments, and data are presented as mean  $\pm$  SD. \*\*\*\*,  $p < 0.0001$ , as  
973 calculated by unpaired Student's *t*-test. (G) Representative maximum-projection time-lapse images of  
974 Rlc1 dynamics at the equatorial region in cells from the indicated strains growing in YES-Glycerol.  
975 Mitotic progression was monitored using Pcp1-GFP-marked SPBs. Time interval is 5 min. (H) The  
976 indicated strains were grown in YES-Glycerol liquid medium for 12 h, and the percentage of septated and

977 multiseptated cells were quantified. Data correspond to three independent experiments and are presented  
978 as mean  $\pm$  SD. **(I)** Representative maximum projection confocal images of cells from the indicated strains  
979 after cell-wall staining with calcofluor white. **(J)** Decimal dilutions of strains of the indicated genotypes  
980 were spotted on plates with YES-Glucose (Glc) or YES-Glycerol (Gly), incubated at 30°C or 5 days, and  
981 photographed. The image corresponds to a representative experiment that was repeated at least three  
982 times with similar results.  
983

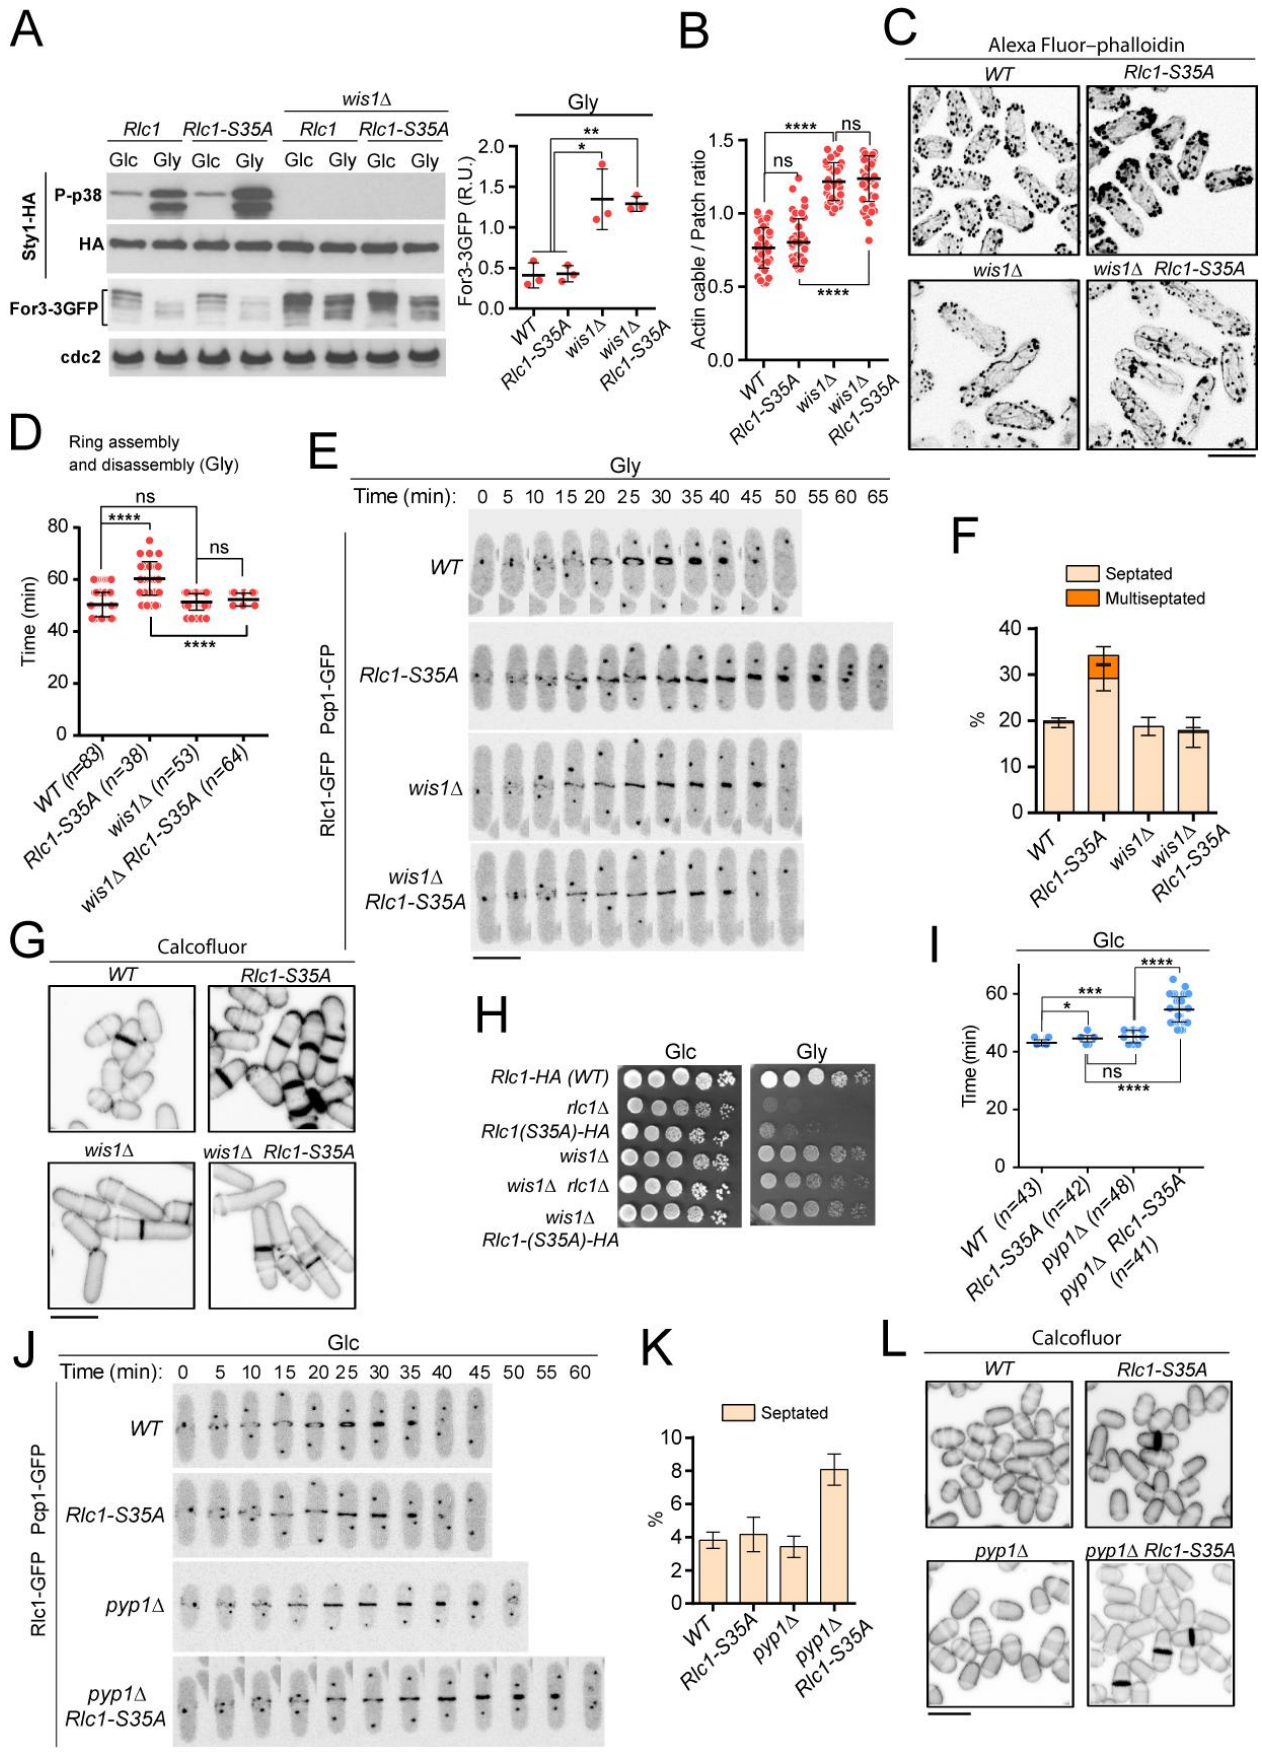

985 **Figure 4. Lack of SAPK signaling restores *S. pombe* cytokinesis and growth during respiration in**  
986 **absence of Rlc1 phosphorylation.**

987 (A) Left: *S. pombe* strains of the indicated genotypes expressing genomic Sty1-HA and For3-3GFP  
988 fusions were grown in either YES-Glucose (Glc) or YES-Glycerol (Gly) medium for 12 h. Activated/total  
989 Sty1 were detected with anti-phospho-p38 and anti-HA antibodies, respectively. Total For3 levels were  
990 detected with anti-GFP antibody. Anti-Cdc2 was used as a loading control. Right: For3 expression levels  
991 in glycerol-growing strains (Gly) are represented as mean relative units  $\pm$  SD and correspond to  
992 experiments performed as biological triplicates. \*,  $p < 0.05$ ; \*\*,  $p < 0.005$ , as calculated by unpaired  
993 Student's *t*-test. (B) Actin cable to patch ratio of G2 cells from the indicated strains growing in YES-  
994 Glycerol medium for 12 h. Quantification data ( $n=41$  cells for each strain), are represented as  
995 mean relative units  $\pm$  SD. \*\*\*\*,  $p < 0.0001$ ; ns, not significant, as calculated by unpaired Student's *t*-test.  
996 (C) Representative maximum projection images of Alexa Fluor–phalloidin stained *S. pombe* cells of the  
997 indicated strains growing in YES-Glycerol medium for 12 h. Scale bar: 10  $\mu$ m. (D) The total time for ring  
998 assembly and disassembly was estimated for the indicated strains growing exponentially in YES-Glycerol  
999 medium by time-lapse confocal fluorescence microscopy. *n* is the total number of cells scored from three  
1000 independent experiments, and data are presented as mean  $\pm$  SD. \*\*\*\*,  $p < 0.0001$ ; ns, not significant, as  
1001 calculated by unpaired Student's *t*-test. (E) Representative maximum-projection time-lapse images of  
1002 Rlc1 dynamics at the equatorial region in cells from the indicated strains growing in YES-Glycerol.  
1003 Mitotic progression was monitored using Pcp1-GFP-marked SPBs. Time interval is 5 min. (F) The  
1004 indicated strains were grown in YES-Glycerol liquid medium for 12 h, and the percentage of septated and  
1005 multiseptated cells were quantified. Data correspond to three independent experiments and are presented  
1006 as mean  $\pm$  SD. (G) Representative maximum projection confocal images of cells from the indicated  
1007 strains after cell-wall staining with calcofluor white. (H) Decimal dilutions of strains of the indicated  
1008 genotypes were spotted on plates with YES-Glucose or YES-Glycerol, incubated at 30°C or 5 days, and  
1009 photographed. The image corresponds to a representative experiment that was repeated at least three  
1010 times with similar results. (I) The total time for ring assembly and disassembly was estimated for the  
1011 indicated strains growing exponentially in YES-Glucose medium by time-lapse confocal fluorescence  
1012 microscopy. *n* is the total number of cells scored from three independent experiments, and data are  
1013 presented as mean  $\pm$  SD. \*\*\*\*,  $p < 0.0001$ ; \*\*\*,  $p < 0.001$ ; \*,  $p < 0.05$ ; ns, not significant, as calculated by  
1014 unpaired Student's *t*-test. (J) Representative maximum-projection time-lapse images of Rlc1 dynamics at  
1015 the equatorial region in cells from the indicated strains growing in YES-Glucose. Mitotic progression was  
1016 monitored using Pcp1-GFP-marked SPBs. Time interval is 5 min. (K) The indicated strains were grown  
1017 in YES-Glucose liquid medium, and the percentage of septated cells were quantified. Data correspond to

1018 three independent experiments and are presented as mean  $\pm$  SD. **(L)** Representative maximum projection  
1019 confocal images of cells from the indicated strains after cell-wall staining with calcofluor white.  
1020

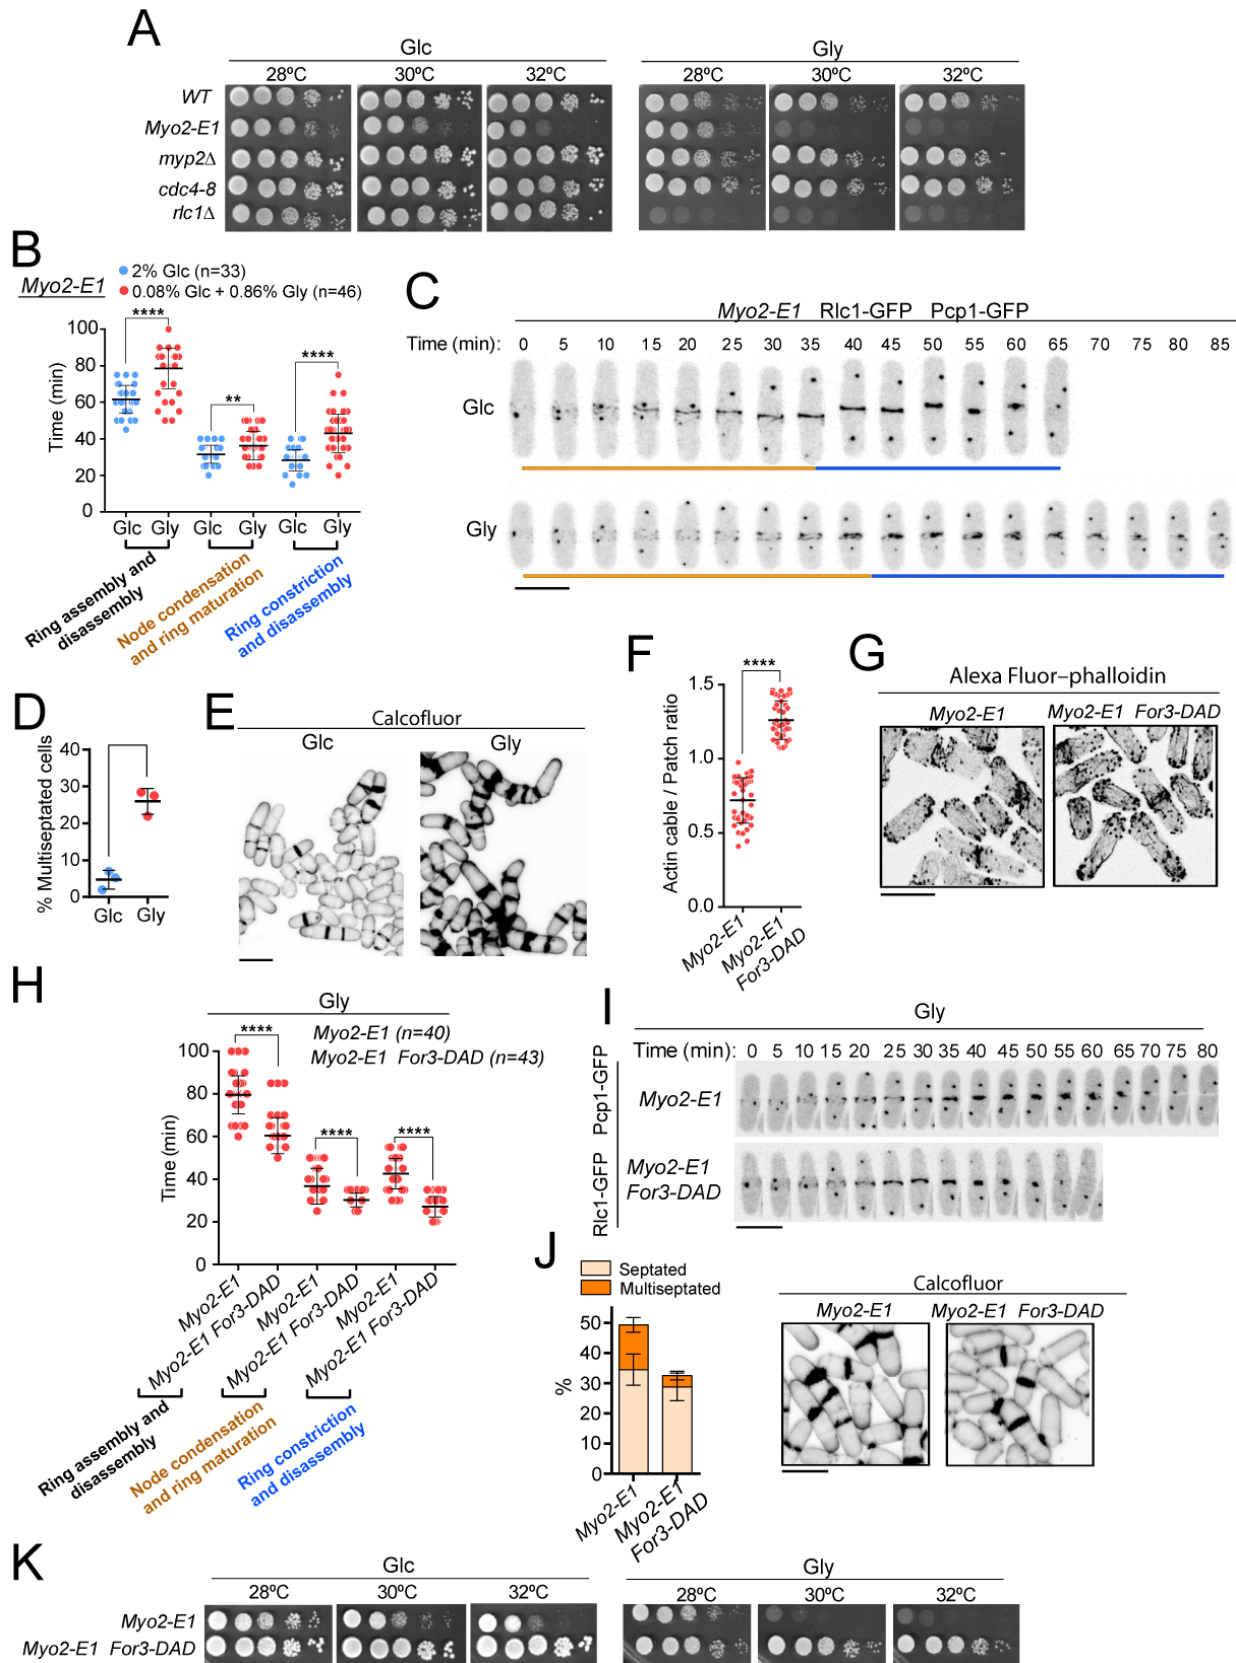

1021 **Figure 5. Control of Myo2 activity by Rlc1 phosphorylation regulates *S. pombe* cytokinesis and**  
1022 **rowth during respiration.**

1023 (A) Decimal dilutions of strains of the indicated genotypes were spotted on plates with YES-Glucose or  
1024 YES-Glycerol, incubated at 28, 30, and 32°C for 3 (Glc) or 5 (Gly) days, and photographed. The images  
1025 correspond to a representative experiment that was repeated at least three times with similar results. (B)  
1026 The times for ring assembly and disassembly, node condensation/ring maturation, and ring constriction  
1027 and disassembly were estimated for *Myo2-E1* cells growing in YES-Glucose (Glc) and YES-Glycerol  
1028 medium (Gly), by time-lapse confocal fluorescence microscopy. Mitotic progression was monitored using  
1029 Pcp1-GFP-marked SPBs. *n* is the total number of cells scored from three independent experiments, and  
1030 data are presented as mean  $\pm$  SD. \*\*\*\*\*,  $p < 0.0001$ ; \*,  $p < 0.05$ , as calculated by unpaired Student's *t*-test.  
1031 (C) Representative maximum-projection time-lapse images of Rlc1 dynamics at the equatorial region in  
1032 *Myo2-E1* Rlc1-GFP cells growing in YES-Glucose (Glc) or YES-Glycerol (Gly). Mitotic progression was  
1033 monitored using Pcp1-GFP-marked SPBs. Time interval is 5 min. Scale bar: 10  $\mu$ m. (D) The percentage  
1034 of multiseptated cells was quantified in *Myo2-E1* cells growing exponentially in YES-Glucose (Glc) or  
1035 YES-Glycerol (Gly) for 12 h. Data correspond to three independent experiments, and are presented as  
1036 mean  $\pm$  SD. (E) Representative maximum projection confocal images of *Myo2-E1* cells growing in YES-  
1037 Glucose or YES-Glycerol after cell-wall staining with calcofluor white. (F) Actin cable to patch ratio of  
1038 G2 cells from the indicated strains growing in YES-Glycerol medium for 12 h. Quantification data ( $n=40$   
1039 cells for each strain), are represented as mean relative units  $\pm$  SD. \*\*\*\*\*,  $p < 0.0001$ , as calculated by  
1040 unpaired Student's *t*-test. (G) Representative maximum projection images of Alexa Fluor-phalloidin  
1041 stained *S. pombe* cells of the indicated strains growing in YES-Glycerol medium for 12 h. (H) The times  
1042 for ring assembly and disassembly, node condensation/ring maturation, and ring constriction and  
1043 disassembly were estimated for *Myo2-E1* and *Myo2-E1 for3-DAD* cells growing exponentially in YES-  
1044 Glycerol medium by time-lapse confocal fluorescence microscopy. Mitotic progression was monitored  
1045 using Pcp1-GFP-marked SPBs. *n* is the total number of cells scored from three independent experiments,  
1046 and data are presented as mean  $\pm$  SD. Statistical comparison between two groups was performed by  
1047 unpaired Student's *t*-test. \*\*\*\*\*,  $p < 0.0001$ , as calculated by unpaired Student's *t* test. (I) Representative  
1048 maximum-projection time-lapse images of Rlc1-GFP dynamics at the equatorial region in *Myo2-E1* and  
1049 *Myo2-E1 for3-DAD* cells growing in YES-Glycerol. Mitotic progression was monitored using Pcp1-GFP-  
1050 marked SPBs. Time interval is 5 min. (J) Left: the percentage of septated and multiseptated cells were  
1051 quantified in *Myo2-E1* and *Myo2-E1 for3-DAD* cells growing for 12 h in YES-Glycerol medium. Data  
1052 correspond to three independent experiments, and are presented as mean  $\pm$  SD. Right: representative  
1053 maximum projection confocal images after cell-wall staining with calcofluor white. (K) Decimal dilutions  
1054 of strains of the indicated genotypes were spotted on plates with YES-Glucose or YES-Glycerol,

1055 incubated at 28, 30, and 32°C for 3 (Glc) or 5 (Gly) days, and photographed. The images correspond to a  
1056 representative experiment that was repeated at least three times with similar results.

1057

1058



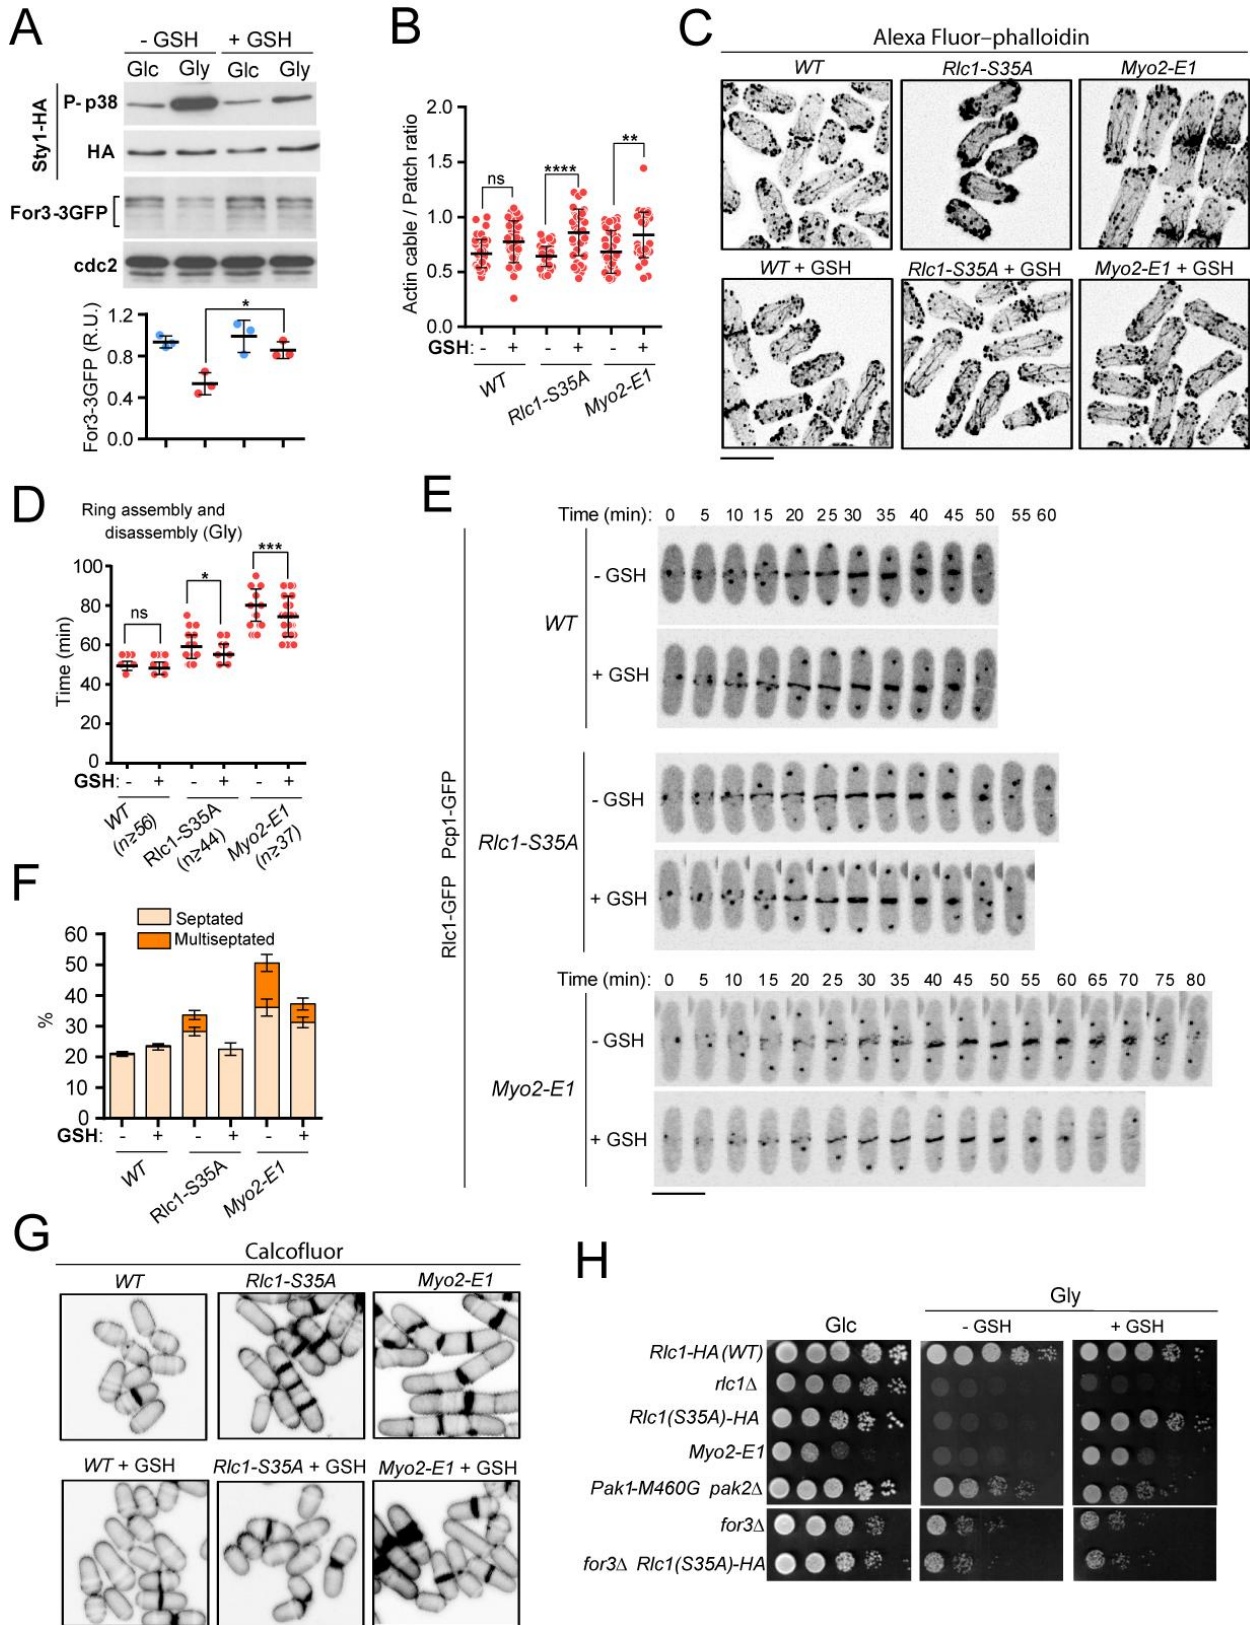

1059

1060 **Figure 6. Exogenous antioxidants bypass the need for Rlc1 phosphorylation to regulate myosin II**  
 1061 **activity and cytokinesis during respiratory growth.**

1062 (A) Upper: *S. pombe* wild type cells expressing genomic Sty1-HA and For3-3GFP fusions were grown to  
1063 mid-log phase in YES-Glucose (Glc) or YES-Glycerol (Gly), with or without 0.16 mM reduced  
1064 glutathione (GSH). Activated/total Sty1 were detected with anti-phospho-p38 and anti-HA antibodies,  
1065 respectively. Total For3 levels were detected with anti-GFP antibody. Anti-Cdc2 was used as a loading  
1066 control. Lower: For3 expression levels are represented as mean relative units  $\pm$  SD and correspond to  
1067 experiments performed as biological triplicates. \*,  $p < 0.05$ , as calculated by unpaired Student's *t*-test. (B)  
1068 Actin cable to patch ratio of G2 cells from the indicated strains growing in YES-Glycerol with or without  
1069 0.16 mM GSH. Quantification data ( $n=41$  cells for each strain), are represented as mean relative units  
1070  $\pm$  SD. \*\*\*\*,  $p < 0.0001$ ; \*\*,  $p < 0.01$ ; ns, not significant, as calculated by unpaired Student's *t*-test. (C)  
1071 Representative maximum projection images of Alexa Fluor–phalloidin stained *S. pombe* cells of the  
1072 indicated strains growing for 12 h in YES-Glycerol medium with or without 0.16 mM GSH. Scale bar: 10  
1073  $\mu$ m. (D) The total time for ring assembly and disassembly was estimated for the indicated strains growing  
1074 exponentially in YES-Glycerol medium with or without 0.16 mM GSH by time-lapse confocal  
1075 fluorescence microscopy. *n* is the total number of cells scored from three independent experiments, and  
1076 data are presented as mean  $\pm$  SD. \*\*\*,  $p < 0.001$ ; \*,  $p < 0.05$  ns, not significant, as calculated by unpaired  
1077 Student's *t* test. (E) Representative maximum-projection time-lapse images of Rlc1 dynamics at the  
1078 equatorial region in cells from the indicated strains growing in YES-Glycerol with or without 0.16 mM  
1079 GSH. Mitotic progression was monitored using Pcp1-GFP-marked SPBs. Time interval is 5 min. (F) The  
1080 percentage of septated and multiseptated cells were quantified in the indicated strains growing for 12 h in  
1081 YES-Glycerol medium with or without 0.16 mM GSH. Data correspond to three independent  
1082 experiments, and are presented as mean  $\pm$  SD. (G) Representative maximum projection confocal images  
1083 of cells growing in YES-Glycerol after cell-wall staining with calcofluor white. (H) Decimal dilutions of  
1084 strains of the indicated genotypes were spotted on plates with YES-Glucose or YES-Glycerol plates with  
1085 or without 0.16 mM GSH, incubated at 28°C for 3 (Glc) or 5 (Gly) days, and photographed. The images  
1086 correspond to a representative experiment that was repeated at least three times with similar results.

1087 **Supplemental Information for**

1088

1089 Myosin II regulatory light chain phosphorylation and formin availability modulate cytokinesis upon  
1090 changes in carbohydrate metabolism.

1091

1092

1093 Francisco Prieto-Ruiz, Elisa Gómez-Gil, Rebeca Martín-García, Armando Jesús Pérez-Díaz, Jero  
1094 Vicente-Soler, Alejandro Franco, Teresa Soto, Pilar Pérez, Marisa Madrid and José Cansado

1095

1096

1097 Corresponding authors: Marisa Madrid and José Cansado

1098

1099 Email: [jcansado@um.es](mailto:jcansado@um.es); [marisa@um.es](mailto:marisa@um.es)

1100

1101

1102

1103

1104

1105

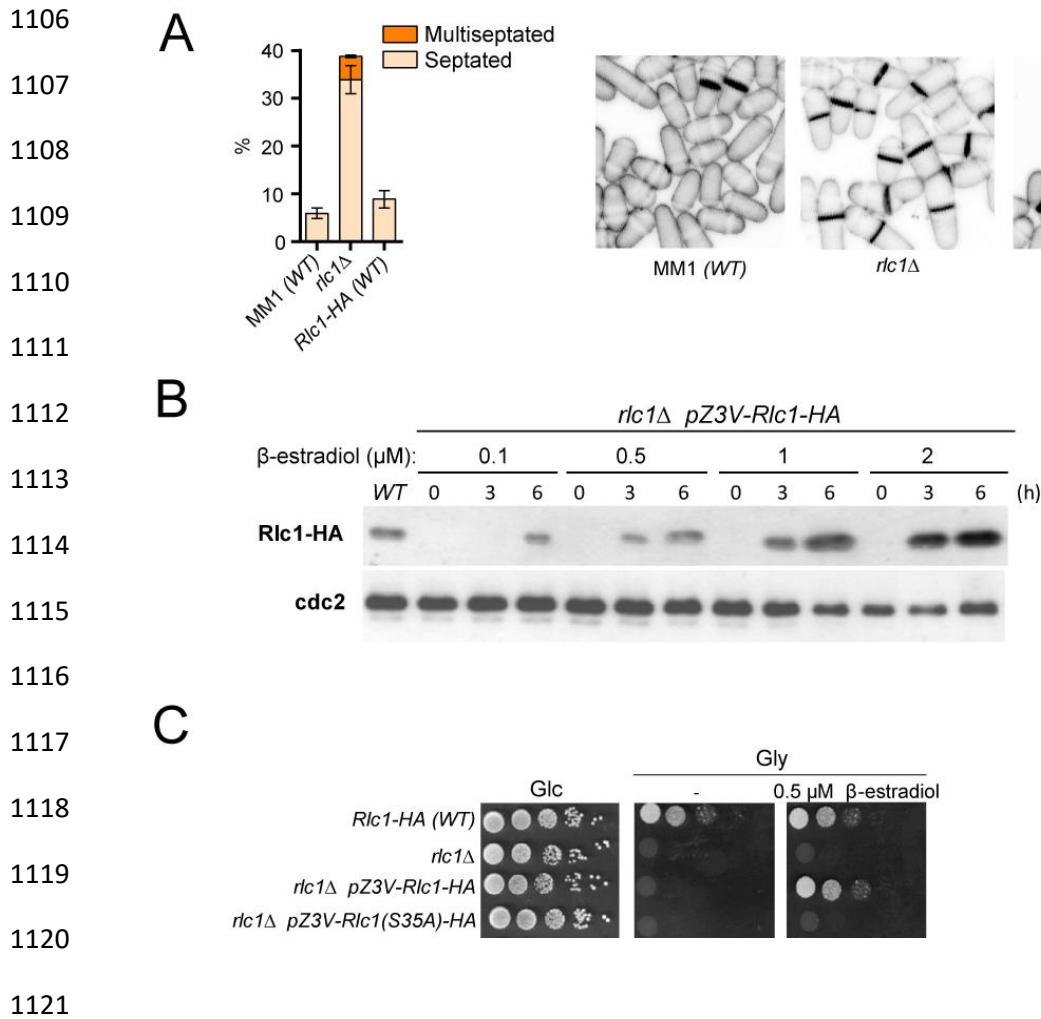

1122 **Figure 1—figure supplement 1. Rlc1 phosphorylation at Ser35 is essential for *S. pombe* respiratory**  
1123 **growth.**

1124 (A) Left: Strains of the indicated genotypes were grown in YES-Glucose liquid medium for 24 h, and the  
1125 percentage of septated and multiseptated cells were quantified. Data correspond to three independent  
1126 experiments, and are presented as mean ± SD. Right: representative maximum projection confocal images  
1127 of cells from the indicated strains after cell-wall staining with calcofluor white. Scale bar: 10 μm.

1128 (B) The strain *rlc1Δ Z3EVpr:Rlc1-HA* was grown in YES-Glucose medium to mid-log phase, and the  
1129 culture was then treated with either 0.1, 0.5, 1, or 2 μM β-estradiol for 0, 3 and 6 h. Total extracts were  
1130 resolved by SDS-PAGE, and Rlc1 levels were detected by incubation with anti-HA antibody. Anti-Cdc2  
1131 was used as a loading control. The Western blot image corresponds to a representative experiment that  
1132 was repeated at least three times with similar results.

1133 (C) Decimal dilutions of strains of the indicated genotypes were spotted on plates with YES-Glucose  
1134 (Glc) or YES-Glycerol (Gly), with or without 0.5 μM β-estradiol, incubated at 30°C or 3 days, and  
1135 photographed. The image corresponds to a representative experiment that was repeated at least three  
1136 times with similar results.

1137

1138

1139

1140

1141

1142

1143

1144

1145

1146

1147

1148

1149

1150

1151

1152

1153

1154

1155

1156 **Figure 2—figure supplement 1. Pak1 phosphorylation of Rlc1 at Ser35 *in vivo*.**

1157 (A) Exponentially growing cells of the analog-sensitive strain Pak1-M460A were grown in YES-Glucose  
1158 medium and treated with 30  $\mu$ M of 3-BrB-PP1 for the indicated times, or remained untreated in the  
1159 presence of solvent alone (MetOH). The corresponding protein extracts were resolved by SDS-PAGE,  
1160 and the Rlc1-HA fusion was detected by incubation with anti-HA antibody. Anti-Cdc2 was used as a  
1161 loading control. S35-P: Rlc1 isoform phosphorylated *in vivo* at Ser35. Unphos.: Rlc1 isoform not  
1162 phosphorylated at Ser35. The image corresponds to a representative experiment that was repeated at least  
1163 three times with similar results.

1164 (B) Total protein extracts from strains expressing either Pak1-GFP or p<sup>pak1+</sup>-Pak2-GFP fusions and  
1165 growing exponentially in YES-Glucose were resolved by SDS-PAGE. Fusions were detected by  
1166 incubation with anti-GFP antibody. Anti-Cdc2 was used as a loading control. The image corresponds to a  
1167 representative experiment that was repeated at least three times with similar results.

1168

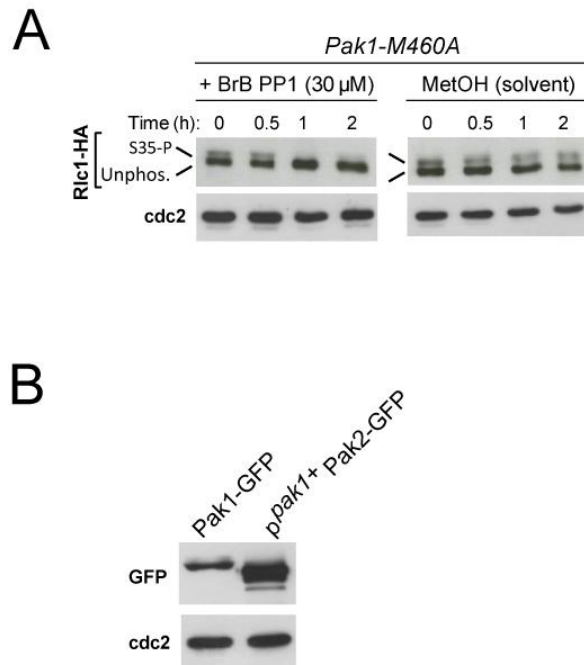

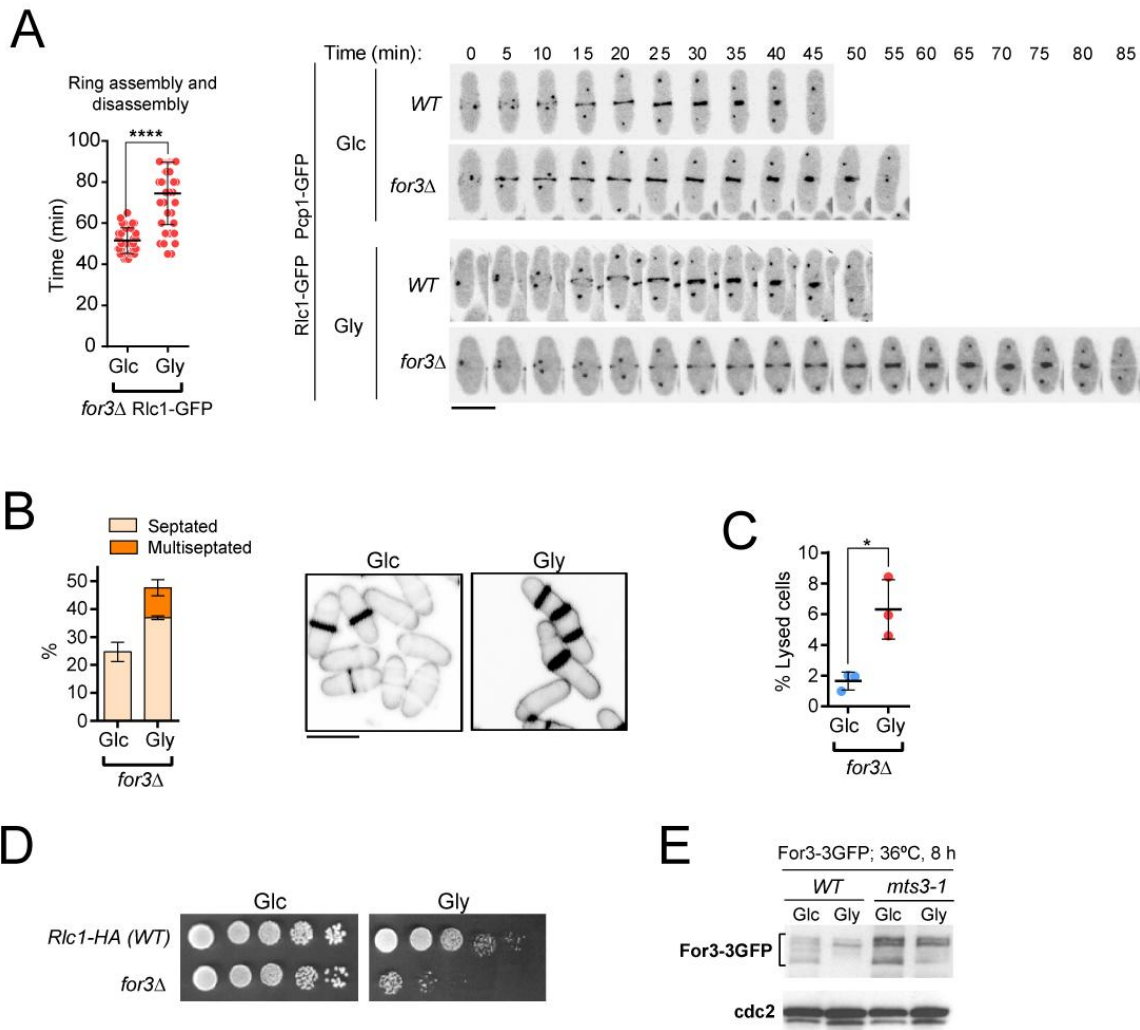

1169

1170 **Figure 3—figure supplement 1. For3 formin is required for *S. pombe* cytokinesis during**  
 1171 **respiratory growth.**

1172 (A) Left: the total time for ring assembly and disassembly was estimated for *for3Δ* Rlc1-GFP cells  
 1173 growing exponentially in either YES-Glucose (Glc) or YES-Glycerol (Gly) medium by time-lapse  
 1174 confocal fluorescence microscopy.  $n \geq 36$  cells from three independent experiments were scored in each  
 1175 condition, and data are presented as mean  $\pm$  SD. \*\*\*\*,  $p < 0.0001$ , as calculated by unpaired Student's *t*  
 1176 test. Right: representative maximum-projection time-lapse images of Rlc1 dynamics at the equatorial  
 1177 region in cells from the indicated strains growing in YES-Glucose or YES-Glycerol. Mitotic progression  
 1178 was monitored using Pcp1-GFP-marked SPBs. Time interval is 5 min. Scale bar: 10  $\mu$ m.

1179 (B) Left: the percentage of septated and multiseptated cells were quantified in *for3Δ* cells growing for 12  
 1180 h in either YES-Glucose (Glc) or YES-Glycerol medium (Gly). Data correspond to three independent  
 1181 experiments, and are presented as mean  $\pm$  SD. Right: representative maximum projection confocal images  
 1182 after cell-wall staining with calcofluor white. Scale bar: 10  $\mu$ m.

1183 (C) The percentage of cell lysis was quantified in *for3Δ* cells growing for 12 h in either YES-Glucose  
1184 (Glc) or YES-Glycerol medium (Gly). Data correspond to three independent experiments, and are  
1185 presented as mean ± SD. \*,  $p < 0.05$ , as calculated by unpaired Student's *t* test.

1186 (D) Decimal dilutions of strains of the indicated genotypes were spotted on plates with YES-Glucose  
1187 (Glc) or YES-Glycerol (Gly), incubated at 30°C for 5 days, and photographed. The image corresponds to  
1188 a representative experiment that was repeated at least three times with similar results.

1189 (E) For3-3GFP levels were determined by Western blot analysis with anti-GFP antibody in extracts from  
1190 wild-type and the proteasome mutant *mts3-1* growing in YES-Glucose (Glc) or YES-Glycerol (Gly) and  
1191 incubated at 36°C for 8 h. Anti-Cdc2 was used as a loading control. The image corresponds to a  
1192 representative experiment that was repeated at least three times with similar results.

1193

1194

1195

1196

1197

1198

1199

1200

1201

1202

1203

1204

1205

1206

1207 **Figure 3—figure supplement 2. Localization of activated Ccd42 at the cell poles and the CAR is**  
1208 **reduced during respiratory growth.**

1209 (A) Upper: intensity plots of CRIB-3GFP fusion (shown as arbitrary fluorescence units), were generated  
1210 from line scans across the equatorial region of *S. pombe* G2 cells (n= 30) growing in YES-Glucose (Glc)  
1211 or YES-Glycerol (Gly). Data are presented as mean  $\pm$  SD. Lower: representative maximum-projection  
1212 images of glucose and glycerol growing cells are shown. Scale bar: 10  $\mu$ m.

1213 (B) Upper: the intensity of the CRIB-3GFP fusion at the medial region of dividing cells (n= 25) in YES-  
1214 Glucose (Glc) or YES-Glycerol (Gly) was measured and is shown as arbitrary fluorescence units. Data  
1215 are presented as mean  $\pm$  SD. \*\*\*\*,  $p < 0.0001$ , as calculated by unpaired Student's *t* test. Lower:  
1216 representative maximum-projection images of dividing cells are shown. Scale bar: 10  $\mu$ m.

1217

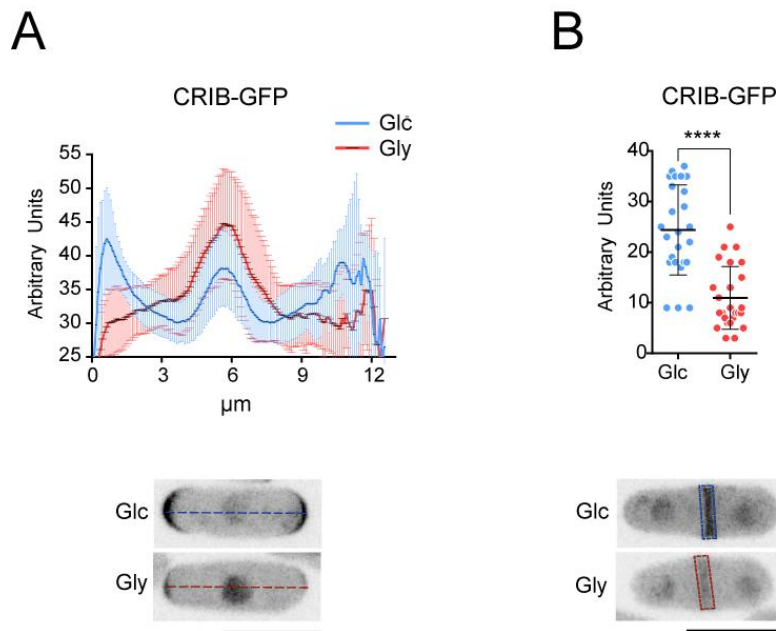



1218

1219

1220

1221

1222

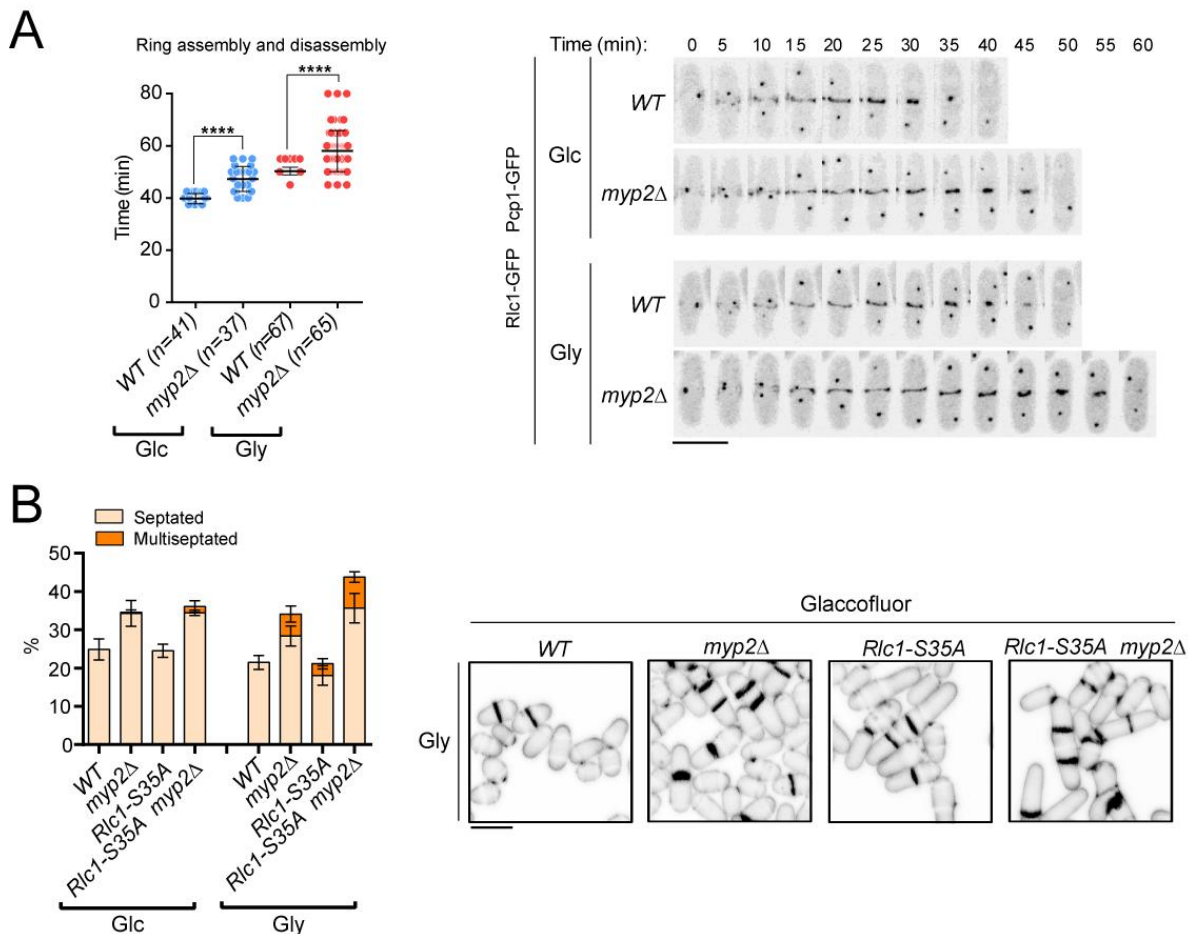

1223 **Figure 5—figure supplement 1. Role of Myp2 on *S. pombe* cytokinesis during respiration.**

1224 (A) Left: the times for ring assembly and disassembly, was estimated for wild type and *myp2Δ* cells  
 1225 growing in YES-Glucose (Glc) or YES-Glycerol medium (Gly), by time-lapse confocal fluorescence  
 1226 microscopy. Mitotic progression was monitored using Pcp1-GFP-marked SPBs. *n* is the total number of  
 1227 cells scored from three independent experiments, and data are presented as mean ± SD. Statistical  
 1228 comparison between two groups was performed by unpaired Student's *t* test. \*\*\*\*,  $p < 0.0001$ , as  
 1229 calculated by unpaired Student's *t* test. Right: representative maximum-projection time-lapse images of  
 1230 Rlc1 dynamics at the equatorial region of wild type and *myp2Δ* cells growing in YES-Glucose (Glc) or  
 1231 YES-Glycerol (Gly). Mitotic progression was monitored using Pcp1-GFP-marked SPBs. Time interval is  
 1232 5 min. Scale bar: 10 μm.

1233 (B) Left: the percentage of septated and multiseptated cells were quantified in the indicated strains  
 1234 growing for 12 h in YES-Glucose (Glc) or YES-Glycerol (Gly). Data correspond to three independent  
 1235 experiments, and are presented as mean ± SD. Right: representative maximum projection confocal images  
 1236 of cells growing in YES-Glycerol after cell-wall staining with calcofluor white. Scale bar: 10 μm.

1237

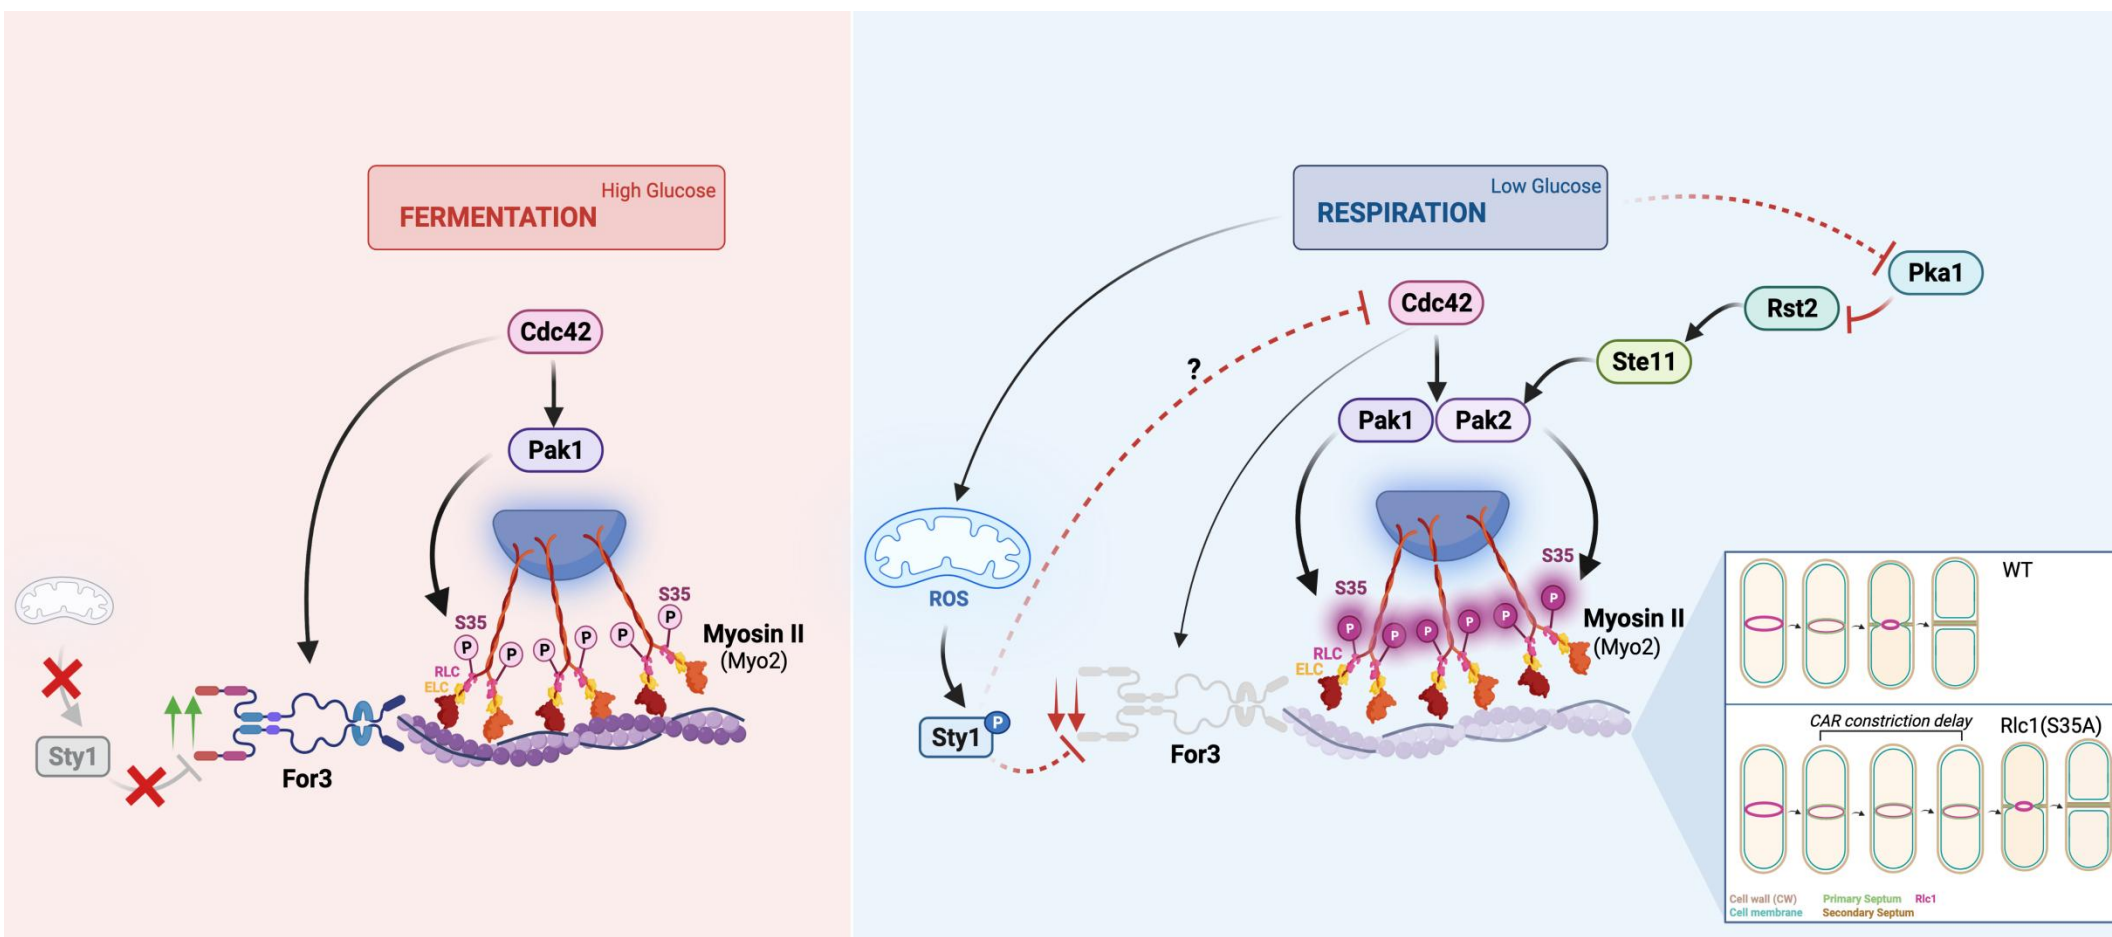

**Figure 6—figure supplement 1.** Model depicting the signaling pathways and mechanisms that regulate *S. pombe* cytokinesis by Myosin II (Myo2) through regulatory light chain phosphorylation during the transition from fermentative to respiratory metabolism. For specific details, please see text.

1 **Source files legends**

2

3 **Figure 1- source data 1.** Source data for Figure 1

4 **Figure 1- source data 2.** Western blot images for Figure 1 A,B

5 **Figure 1- figure supplement 1-source data 1.** Source data for Figure 1-figure supplement 1

6 **Figure 1- figure supplement 1- source data 2.** Western blot images for figure supplement 1B

7 **Figure 2- source data 1.** Source data for Figure 2

8 **Figure 2- source data 2.** Western blot images for Figure 2B,C,D.

9 **Figure 2- figure supplement 1- source data 1.** Western blot images for figure supplement 1A,B

10 **Figure 3- source data 1.** Source data for Figure 3

11 **Figure 3- source data 2.** Western blot images for Figure 3A,C.

12 **Figure 3- figure supplement 1-source data 1.** Source data for Figure 3-figure supplement 1

13 **Figure 3- figure supplement 1-source data 2.** Western blot images for figure supplement 1E

14 **Figure 3- figure supplement 2-source data 1.** Source data for Figure 3-figure supplement 2

15 **Figure 4- source data 1.** Source data for Figure 4

16 **Figure 4- source data 2.** Western blot images for Figure 4A.

17 **Figure 5- source data 1.** Source data for Figure 5

18 **Figure 5- figure supplement 1-source data 1.** Source data for Figure 5-figure supplement 1

19 **Figure 6- source data 1.** Source data for Figure 6

20 **Figure 6- source data 2.** Western blot images for Figure 6A.

21

22

23

24

25  
26

**Table S1.** *S. pombe* strains used in this study.

| Strain          | Genotype                                                                                                                                           | Source/Reference         |
|-----------------|----------------------------------------------------------------------------------------------------------------------------------------------------|--------------------------|
| <b>Figure 1</b> |                                                                                                                                                    |                          |
| FPR727          | <i>h<sup>-</sup> rlc1::kanR rlc1-HA::ura4<sup>+</sup> ade6-M216 leu1-32</i>                                                                        | This work                |
| FPR645          | <i>h<sup>-</sup> rlc1::kanR ade6-M216 leu1-32 ura4.294</i>                                                                                         | This work                |
| FPR730          | <i>h<sup>-</sup> rlc1::kanR rlc1(S35A)-HA::ura4<sup>+</sup> ade6-M216 leu1-32</i>                                                                  | This work                |
| FPR732          | <i>h<sup>-</sup> rlc1::kanR rlc1(S36A)-HA::ura4<sup>+</sup> ade6-M216 leu1-32</i>                                                                  | This work                |
| FPR735          | <i>h<sup>-</sup> rlc1::kanRn rlc1(S35AS36A)-HA::ura4<sup>+</sup> ade6-M216 leu1-32</i>                                                             | This work                |
| FPR830          | <i>h<sup>?</sup> Pcp1-GFP::kanR Rlc1-GFP::kanR cdc2ASM17:bsdR rlc1-HA::ura4<sup>+</sup> ade6-M216 leu1-32</i>                                      | This work                |
| FPR961          | <i>h<sup>+</sup> Pcp1-GFP::kanR rlc1::kanR Rlc1-GFP::ura4<sup>+</sup> ade6-M216 leu1-32</i>                                                        | This work                |
| FPR965          | <i>h<sup>+</sup> Pcp1-GFP::kanR rlc1::kanR Rlc1(S35A)-GFP::ura4<sup>+</sup> ade6-M216 leu1-32</i>                                                  | This work                |
| <b>Figure 2</b> |                                                                                                                                                    |                          |
| MBY4489         | <i>h<sup>-</sup> pak1-2xMyc-GFP::ura4<sup>+</sup></i>                                                                                              | Loo <i>et al.</i> , 2008 |
| MBY5064         | <i>h<sup>-</sup> pak1-M460G-2xMyc-GFP::ura4<sup>+</sup></i>                                                                                        | Loo <i>et al.</i> , 2008 |
| FPR1132         | <i>h<sup>?</sup> pak1-2xMyc-GFP::ura4<sup>+</sup> rlc1::kanR rlc1-HA::ura4<sup>+</sup> ade6-M216 leu1-32</i>                                       | This work                |
| FPR1141         | <i>h<sup>?</sup> pak1M460G-2xMyc-GFP::ura4<sup>+</sup> rlc1::kanR rlc1-HA::ura4<sup>+</sup> ade6-M216 leu1-32</i>                                  | This work                |
| FPR1145         | <i>h<sup>?</sup> pak1-2xMyc-GFP::ura4<sup>+</sup> rlc1::kanR shk2::kanR rlc1-HA::ura4<sup>+</sup> ade6-M216 leu1-32</i>                            | This work                |
| FPR1142         | <i>h<sup>?</sup> pak1M460G-2xMyc-GFP::ura4<sup>+</sup> rlc1::kanR shk2::kanR rlc1-HA::ura4<sup>+</sup> ade6-M216 leu1-32</i>                       | This work                |
| FPR1269         | <i>h<sup>?</sup> pak1-2xMyc-GFP::ura4<sup>+</sup> Pcp1-mcherry::ura4<sup>+</sup> Rlc1-mcherry::kanR ade6-M216 leu1-32 ura4.D18</i>                 | This work                |
| FPR1281         | <i>h<sup>?</sup> pak1M460G-2xMyc-GFP::ura4<sup>+</sup> Pcp1-mcherry::ura4<sup>+</sup> Rlc1-mcherry::kanR ade6-M216 leu1-32 ura4.D18</i>            | This work                |
| FPR1272         | <i>h<sup>?</sup> pak1-2xMyc-GFP::ura4<sup>+</sup> Pcp1-mcherry::ura4<sup>+</sup> Rlc1-mcherry::kanR shk2::kanR ade6-M216 leu1-32 ura4.D18</i>      | This work                |
| FPR1282         | <i>h<sup>?</sup> pak1M460G-2xMyc-GFP::ura4<sup>+</sup> Pcp1-mcherry::ura4<sup>+</sup> Rlc1-mcherry::kanR shk2::kanR ade6-M216 leu1-32 ura4.D18</i> | This work                |
| PPG4.69         | <i>h<sup>+</sup> pak1-GFP::kanR leu1-32 ura4.D18</i>                                                                                               | Lab                      |
| FPR1482         | <i>h<sup>?</sup> pak1-GFP::kanR shk2::hphR shk2-3xGFP::ura4<sup>+</sup> ade6-M216 leu1-32</i>                                                      | This work                |
| FPR1460         | <i>h<sup>-</sup> shk2::hphR shk2-3xGFP::ura4<sup>+</sup> ade6-M216 leu1-32</i>                                                                     | This work                |
| FPR1554         | <i>h<sup>-</sup> shk2::hphR shk2-3xGFP::ura4<sup>+</sup> ste11::natR ade6-M216 leu1-32</i>                                                         | This work                |
| FPR1481         | <i>h<sup>-</sup> shk2::hphR promste11<sup>+</sup>A/G:shk2-3xGFP::ura4<sup>+</sup> ade6-M216 leu1-32</i>                                            | This work                |
| FPR1607         | <i>h<sup>?</sup> shk2::hphR shk2-3xGFP::ura4<sup>+</sup> pka1::kanR ade6-M216 leu1-32</i>                                                          | This work                |

|         |                                                                                                                                                                                  |                                |
|---------|----------------------------------------------------------------------------------------------------------------------------------------------------------------------------------|--------------------------------|
| FPR1608 | <i>h<sup>2</sup> shk2::hphR shk2-3xGFP::ura4<sup>+</sup> rst2::natR ade6-M216 leu1-32</i>                                                                                        |                                |
| FPR1611 | <i>h<sup>2</sup> shk2::hphR shk2-3xGFP::ura4<sup>+</sup> pka1::kanR rst2::natR ade6-M216 leu1-32</i>                                                                             |                                |
| FPR1530 | <i>h<sup>-</sup> shk2::hphR prompak1<sup>+</sup> shk2-GFP::ura4<sup>+</sup> ade6-M216 leu1-32</i>                                                                                | This work                      |
| FPR1559 | <i>h<sup>2</sup> shk2::hphR prompak1<sup>+</sup> shk2-GFP::ura4<sup>+</sup> pcp1-mcherry::ura4<sup>+</sup> Rlc1-mcherry::kanR ade6-M216 leu1-32</i>                              | This work                      |
|         | <b>Figure 3</b>                                                                                                                                                                  |                                |
| E888    | <i>h<sup>+</sup> for3-3xGFP::ura4<sup>+</sup> sty1-HA6H::ura4<sup>+</sup> ade6-M216 leu1-32 ura4-D18</i>                                                                         | Gomez-Gil <i>et al.</i> , 2020 |
| FPR1441 | <i>h<sup>2</sup> for3DAD-2xGFP::kanR sty1-HA6H::ura4<sup>+</sup> rlc1::kanR rlc1-GFP::ura4<sup>+</sup> ade6-M216 leu1-32 ura4-D18</i>                                            | This work                      |
| FPR1443 | <i>h<sup>2</sup> for3DAD-2xGFP::kanR sty1-HA6H::ura4<sup>+</sup> rlc1::kanR rlc1(S35A)-GFP::ura4<sup>+</sup> ade6-M216 leu1-32 ura4-D18</i>                                      | This work                      |
| FPR961  | <i>h<sup>+</sup> Pcp1-GFP:kanR rlc1::kanR Rlc1-GFP::ura4<sup>+</sup> ade6-M216 leu1-32</i>                                                                                       | This work                      |
| FPR965  | <i>h<sup>+</sup> Pcp1-GFP:kanR rlc1::kanR Rlc1(S35A)-GFP::ura4<sup>+</sup> ade6-M216 leu1-32</i>                                                                                 | This work                      |
| FPR1292 | <i>h<sup>2</sup> Pcp1-GFP:kanR rlc1::kanR Rlc1-GFP::ura4<sup>+</sup> for3DAD ade6-M216 leu1-32</i>                                                                               | This work                      |
| FPR1296 | <i>h<sup>2</sup> Pcp1-GFP:kanR rlc1::kanR Rlc1(S35A)-GFP::ura4<sup>+</sup> for3DAD ade6-M216 leu1-32</i>                                                                         | This work                      |
| FPR1340 | <i>h<sup>2</sup> Pcp1-mcherry::ura4<sup>+</sup> Rlc1-mcherry::kanR for3-3xGFP::ura4<sup>+</sup> pak1-M460G-2xMyc-GFP::ura4<sup>+</sup> shk2::kanR ade6-M216 leu1-32 ura4.D18</i> | This work                      |
| FPR1345 | <i>h<sup>2</sup> Pcp1-mcherry::ura4<sup>+</sup> Rlc1-mcherry::kanR pak1-M460G-2xMyc-GFP::ura4<sup>+</sup> for3DAD-2xGFP::kanR shk2::kanR ade6-M216 leu1-32 ura4.D18</i>          | This work                      |
| FPR1089 | <i>h<sup>2</sup> for3-3xGFP::ura4<sup>+</sup> rlc1::kanR rlc1-HA::ura4<sup>+</sup> kanR ade6-M216 leu1-32</i>                                                                    | This work                      |
| FPR1094 | <i>h<sup>2</sup> for3-3xGFP::ura4<sup>+</sup> rlc1::kanR rlc1(S35A)-HA::ura4<sup>+</sup> kanR ade6-M216 leu1-32</i>                                                              | This work                      |
| FPR1410 | <i>h<sup>2</sup> for3DAD-2xGFP::kanR rlc1::kanR rlc1-HA::ura4<sup>+</sup> kanR ade6-M216 leu1-32</i>                                                                             | This work                      |
| FPR1415 | <i>h<sup>2</sup> for3DAD-2xGFP::kanR rlc1::kanR rlc1(S35A)-HA::ura4<sup>+</sup> kanR ade6-M216 leu1-32</i>                                                                       | This work                      |
|         | <b>Figure 4</b>                                                                                                                                                                  |                                |
| FPR1000 | <i>h<sup>+</sup> for3-3xGFP::ura4<sup>+</sup> sty1-HA6H::ura4<sup>+</sup> rlc1::kanR rlc1-GFP::ura4<sup>+</sup> ade6-M216 leu1-32</i>                                            | This work                      |
| FPR1048 | <i>h<sup>+</sup> for3-3xGFP::ura4<sup>+</sup> sty1-HA6H::ura4<sup>+</sup> rlc1::kanR rlc1(S35A)-GFP::ura4<sup>+</sup> ade6-M216 leu1-32</i>                                      | This work                      |
| FPR1054 | <i>h<sup>2</sup> for3-3xGFP::ura4<sup>+</sup> sty1-HA6H::ura4<sup>+</sup> rlc1::kanR rlc1-GFP::ura4<sup>+</sup> wis1::his ade6-M216 leu1-32</i>                                  | This work                      |
| FPR1059 | <i>h<sup>2</sup> for3-3xGFP::ura4<sup>+</sup> sty1-HA6H::ura4<sup>+</sup> rlc1::kanR rlc1(S35A)-GFP::ura4<sup>+</sup> wis1::his ade6-M216 leu1-32</i>                            | This work                      |
| FPR727  | <i>h<sup>-</sup> rlc1::kanR rlc1-HA::ura4<sup>+</sup> ade6-M216 leu1-32</i>                                                                                                      | This work                      |
| FPR645  | <i>h<sup>-</sup> rlc1::kanR ade6-M216 leu1-32 ura4.294</i>                                                                                                                       | This work                      |

|                               |                                                                                                                              |                                      |
|-------------------------------|------------------------------------------------------------------------------------------------------------------------------|--------------------------------------|
| FPR730                        | <i>h<sup>-</sup> rlc1::kanR rlc1(S35A)-HA::ura4<sup>+</sup> ade6-M216 leu1-32</i>                                            | This work                            |
| FPR1228                       | <i>h<sup>-</sup> rlc1::kanR rlc1-HA::ura4<sup>+</sup> wis1::his ade6-M216 leu1-32</i>                                        | This work                            |
| FPR1231                       | <i>h<sup>-</sup> rlc1::kanR wis1::his ade6-M216 leu1-32</i>                                                                  | This work                            |
| FPR1237                       | <i>h<sup>-</sup> rlc1::kanR rlc1(S35A)-HA::ura4<sup>+</sup> wis1::his ade6-M216 leu1-32</i>                                  | This work                            |
| FPR961                        | <i>h<sup>+</sup> Pcp1-GFP:kanR rlc1::kanR Rlc1-GFP::ura4<sup>+</sup> ade6-M216 leu1-32</i>                                   | This work                            |
| FPR965                        | <i>h<sup>+</sup> Pcp1-GFP:kanR rlc1::kanR Rlc1(S35A)-GFP::ura4<sup>+</sup> ade6-M216 leu1-32</i>                             | This work                            |
| FPR1233                       | <i>h<sup>?</sup> Pcp1-GFP:kanR rlc1::kanR Rlc1-GFP::ura4<sup>+</sup> wis1::his ade6-M216 leu1-32</i>                         | This work                            |
| FPR1235                       | <i>h<sup>?</sup> Pcp1-GFP:kanR rlc1::kanR Rlc1(S35A)-GFP::ura4<sup>+</sup> wis1::his ade6-M216 leu1-32</i>                   | This work                            |
| FPR1361                       | <i>h<sup>?</sup> Pcp1-GFP:kanR rlc1::kanR Rlc1-GFP::ura4<sup>+</sup> pyp1::kanR ade6-M216 leu1-32</i>                        | This work                            |
| FPR1406                       | <i>h<sup>?</sup> Pcp1-GFP:kanR rlc1::kanR Rlc1(S35A)-GFP::ura4<sup>+</sup> pyp1::hphR ade6-M216 leu1-32</i>                  | This work                            |
| <b>Figure 5</b>               |                                                                                                                              |                                      |
| MM1                           | <i>h<sup>+</sup> ade6-M216 leu1-32 ura4.D18</i>                                                                              | Madrid <i>et al.</i> , 2006          |
| FPR876                        | <i>h<sup>-</sup> myo2.E1 ade6-M216 leu1-32 ura4.D18</i>                                                                      | Balasubramanian <i>et al.</i> , 1998 |
| FPR462                        | <i>h<sup>+</sup> myo3::kanR ade6-M216 leu1-32 ura4.D18</i>                                                                   | Lab Stock                            |
| FPR441                        | <i>h<sup>+</sup> cdc4-8 ade6-M216 leu1-32 ura4.D18</i>                                                                       | Lab Stock                            |
| FPR645                        | <i>h<sup>-</sup> rlc1::kanR ade6-M216 leu1-32 ura4.294</i>                                                                   | This work                            |
| FPR1461                       | <i>h<sup>?</sup> Pcp1-GFP:kanR rlc1::kanR Rlc1-GFP::ura4<sup>+</sup> myo2.E1 ade6-M216 leu1-32</i>                           | This work                            |
| FPR1498                       | <i>h<sup>?</sup> Pcp1-GFP:kanR rlc1::kanR Rlc1-GFP::ura4<sup>+</sup> myo2.E1 for3DAD ade6-M216 leu1-32</i>                   | This work                            |
| <b>Figure 6</b>               |                                                                                                                              |                                      |
| E888                          | <i>h<sup>+</sup> for3-3xGFP::ura4<sup>+</sup> sty1-HA6H::ura4<sup>+</sup> ade6-M216 leu1-32 ura4-D18</i>                     | Gomez-Gil <i>et al.</i> , 2020       |
| FPR961                        | <i>h<sup>+</sup> Pcp1-GFP:kanR rlc1::kanR Rlc1-GFP::ura4<sup>+</sup> ade6-M216 leu1-32</i>                                   | This work                            |
| FPR965                        | <i>h<sup>+</sup> Pcp1-GFP:kanR rlc1::kanR Rlc1(S35A)-GFP::ura4<sup>+</sup> ade6-M216 leu1-32</i>                             | This work                            |
| FPR1461                       | <i>h<sup>?</sup> Pcp1-GFP:kanR rlc1::kanR Rlc1-GFP::ura4<sup>+</sup> myo2.E1 ade6-M216 leu1-32</i>                           | This work                            |
| FPR727                        | <i>h<sup>-</sup> rlc1::kanR rlc1-HA::ura4<sup>+</sup> ade6-M216 leu1-32</i>                                                  | This work                            |
| FPR645                        | <i>h<sup>-</sup> rlc1::kanR ade6-M216 leu1-32 ura4.294</i>                                                                   | This work                            |
| FPR730                        | <i>h<sup>-</sup> rlc1::kanR rlc1(S35A)-HA::ura4<sup>+</sup> ade6-M216 leu1-32</i>                                            | This work                            |
| FPR1489                       | <i>h<sup>?</sup> rlc1::kanR rlc1-HA::ura4<sup>+</sup> myo2.E1 ade6-M216 leu1-32</i>                                          | This work                            |
| FPR1142                       | <i>h<sup>?</sup> pak1M460G-2xMyc-GFP::ura4<sup>+</sup> rlc1::kanR shk2::kanR rlc1-HA::ura4<sup>+</sup> ade6-M216 leu1-32</i> | This work                            |
| FPR1130                       | <i>h<sup>?</sup> rlc1::kanR rlc1-HA::ura4<sup>+</sup> for3::natR ade6-M216 leu1-32</i>                                       | This work                            |
| FPR1135                       | <i>h<sup>?</sup> rlc1::kanR rlc1(S35A)-HA::ura4<sup>+</sup> for3::natR ade6-M216 leu1-32</i>                                 | This work                            |
| <b>Supplementary Figure 1</b> |                                                                                                                              |                                      |

|                               |                                                                                                                 |                                |
|-------------------------------|-----------------------------------------------------------------------------------------------------------------|--------------------------------|
| MM1                           | <i>h<sup>+</sup> ade6-M216 leu1-32 ura4.D18</i>                                                                 | Madrid <i>et al.</i> , 2006    |
| FPR727                        | <i>h<sup>-</sup> rlc1::kanR rlc1-HA::ura4<sup>+</sup> ade6-M216 leu1-32</i>                                     | This work                      |
| FPR719                        | <i>h<sup>-</sup> rlc1::kanR pZ3EVrlc1-HA::ura4<sup>+</sup> adh1-Z<sub>3</sub>EV::leu1<sup>+</sup> ade6-M216</i> | This work                      |
| FPR722                        | <i>h<sup>-</sup> rlc1::kanR pZ3EVrlc1-HA::ura4<sup>+</sup> adh1-Z<sub>3</sub>EV::leu1<sup>+</sup> ade6-M216</i> | This work                      |
| FPR645                        | <i>h<sup>-</sup> rlc1::kanR ade6-M216 leu1-32 ura4.294</i>                                                      | This work                      |
| <b>Supplementary Figure 2</b> |                                                                                                                 |                                |
| FPR1153                       | <i>h<sup>?</sup> rlc1::kanR rlc1-HA::ura4<sup>+</sup> shk1::natR shk1(M460A)::hphR ade6-M216 leu1-32</i>        | This work                      |
| PPG4.69                       | <i>h<sup>+</sup> pak1-GFP::kanR leu1-32 ura4.D18</i>                                                            | Lab stock                      |
| FPR1530                       | <i>h<sup>-</sup> shk2::hphR prompak1<sup>+</sup>shk2-GFP::ura4<sup>+</sup> ade6-M216 leu1-32</i>                | This work                      |
| <b>Supplementary Figure 3</b> |                                                                                                                 |                                |
| FPR961                        | <i>h<sup>+</sup> Pcp1-GFP::kanR rlc1::kanR Rlc1-GFP::ura4<sup>+</sup> ade6-M216 leu1-32</i>                     | This work                      |
| FPR1126                       | <i>h<sup>?</sup> Pcp1-GFP::kanR rlc1::kanR Rlc1-GFP::ura4<sup>+</sup> for3::natR ade6-M216 leu1-32</i>          | This work                      |
| FPR965                        | <i>h<sup>+</sup> Pcp1-GFP::kanR rlc1::kanR Rlc1(S35A)-GFP::ura4<sup>+</sup> ade6-M216 leu1-32</i>               | This work                      |
| FPR1132                       | <i>h<sup>?</sup> Pcp1-GFP::kanR rlc1::kanR Rlc1(S35A)-GFP::ura4<sup>+</sup> for3::natR ade6-M216 leu1-32</i>    | This work                      |
| FPR727                        | <i>h<sup>-</sup> rlc1::kanR rlc1-HA::ura4<sup>+</sup> ade6-M216 leu1-32</i>                                     | This work                      |
| FPR645                        | <i>h<sup>-</sup> rlc1::kanR ade6-M216 leu1-32 ura4.294</i>                                                      | This work                      |
| FPR730                        | <i>h<sup>-</sup> rlc1::kanR rlc1(S35A)-HA::ura4<sup>+</sup> ade6-M216 leu1-32</i>                               | This work                      |
| FPR1130                       | <i>h<sup>?</sup> rlc1::kanR rlc1-HA::ura4<sup>+</sup> for3::natR ade6-M216 leu1-32</i>                          | This work                      |
| FPR1135                       | <i>h<sup>?</sup> rlc1::kanR rlc1(S35A)-HA::ura4<sup>+</sup> for3::natR ade6-M216 leu1-32</i>                    | This work                      |
| E880                          | <i>h<sup>+</sup> for3-3xGFP::ura4<sup>+</sup> ade6-M216 leu1-32 ura4-D18</i>                                    | Gomez-Gil <i>et al.</i> , 2020 |
| E998                          | <i>h<sup>?</sup> for3-3xGFP::ura4<sup>+</sup> mts3-1 ade6-M216 leu1-32 ura4-D18</i>                             | Gomez-Gil <i>et al.</i> , 2020 |
| <b>Supplementary Figure 4</b> |                                                                                                                 |                                |
| E32                           | <i>h<sup>-</sup> CRIB-GFP::ura4<sup>+</sup> 1 ade6-M216 leu1-32</i>                                             | Lab Stock                      |
| <b>Supplementary Figure 5</b> |                                                                                                                 |                                |
| FPR961                        | <i>h<sup>+</sup> Pcp1-GFP::kanR rlc1::kanR Rlc1-GFP::ura4<sup>+</sup> ade6-M216 leu1-32</i>                     | This work                      |
| FPR1547                       | <i>h<sup>-</sup> Pcp1-GFP::kanR rlc1::kanR Rlc1-GFP::ura4<sup>+</sup> myo3::kanR ade6-M216 leu1-32</i>          | This work                      |
| FPR965                        | <i>h<sup>+</sup> Pcp1-GFP::kanR rlc1::kanR Rlc1(S35A)-GFP::ura4<sup>+</sup> ade6-M216 leu1-32</i>               | This work                      |
| FPR1619                       | <i>h<sup>?</sup> Pcp1-GFP::kanR rlc1::kanR Rlc1(S35A)-GFP::ura4<sup>+</sup> myo3::kanR ade6-M216 leu1-32</i>    | This work                      |

29 **Table S2.** Oligonucleotides and DNA fragments used in this study.  
30

| OLIGONUCLEOTIDE        | SEQUENCE 5'-3'                                                                                                             | Use                                                                          |
|------------------------|----------------------------------------------------------------------------------------------------------------------------|------------------------------------------------------------------------------|
| Rlc1D-FWD              | AGTTTTTTTCATTTCTTAATTCTCCGTACTTTACTTTACAG<br>CATAACTATATCTTATTTGATCATTTGCTCTGTTAACG<br>CGGATCCCCGGGTTAATTA                 | <i>rlc1</i> <sup>+</sup> deletion                                            |
| Rlc1D-REV              | TTCGTCTAAGGGAAATGGCTCAGGTTAAAAAGATAAAGTA<br>TTAGAGGGAAGAATGTGAAACATATCTGGCTGCTCTTAAC<br>GAATTCGAGCTCGTTTAAAC               | <i>rlc1</i> <sup>+</sup> deletion                                            |
| Rlc1D-COMP FWD         | ATCCTCGCCTTACGGTGTATAA                                                                                                     | Confirmation of <i>rlc1</i> <sup>+</sup> deletion                            |
| KAN-COMP-R             | GATGTGAGAACTGTATCCTAGCAAG                                                                                                  | Confirmation of gene tagging                                                 |
| Rlc1-Seq1-FWD          | CTGAGACTTACCAAGAGCTTGAATATC                                                                                                | <i>rlc1</i> <sup>+</sup> sequencing                                          |
| Rlc1-S35A-FWD          | <b>T TCT CAA AGA GTT GCT GCC CAA GCC GCT AAA CGA<br/>GCA GCT TCT GGT GCA TTT GCG CAA CTT ACT TCT<br/>TCC CAA ATT CAA G</b> | Rlc1 serine-35 replaced by alanine (site-directed mutagenesis)               |
| Rlc1-S35A-REV          | CTTGAATTTGGGAAGAAGTAAGTTGCGCAAATGCACCAGA<br>AGCTGCTCGTTTAGCGGCTTGGGCAGCAACTCTTTGAGA<br>A                                   | Rlc1 serine-35 replaced by alanine (site-directed mutagenesis)               |
| Rlc1-S36A-FWD          | <b>T TCT CAA AGA GTT GCT GCC CAA GCC GCT AAA CGA<br/>GCA TCT GCT GGT GCA TTT GCG CAA CTT ACT TCT<br/>TCC CAA ATT CAA G</b> | Rlc1 serine-36 replaced by alanine (site-directed mutagenesis)               |
| Rlc1-S36A-REV          | CTTGAATTTGGGAAGAAGTAAGTTGCGCAAATGCACCAGC<br>AGATGCTCGTTTAGCGGCTTGGGCAGCAACTCTTTGAGAA                                       | Rlc1 serine-36 replaced by alanine (site-directed mutagenesis)               |
| Rlc1-S35AS36A-FWD      | <b>T TCT CAA AGA GTT GCT GCC CAA GCC GCT AAA CGA<br/>GCA GCT GCT GGT GCA TTT GCG CAA CTT ACT TCT<br/>TCC CAA ATT CAA G</b> | Rlc1 serine-35 and serine-36 replaced by alanine (site-directed mutagenesis) |
| Rlc1-S35AS36A-REV      | CTTGAATTTGGGAAGAAGTAAGTTGCGCAAATGCACCAGC<br>AGCTGCTCGTTTAGCGGCTTGGGCAGCAACTCTTTGAGA<br>A                                   | Rlc1 serine-35 and serine-36 replaced by alanine (site-directed mutagenesis) |
| Rlc1 (SmaI)- FWD       | TAT ATC CCG GGA TGT TCT CTT CGA AGG AAA ATT CCT                                                                            | <i>rlc1</i> <sup>+</sup> cloning in pZ3Ev plasmid                            |
| Rlc1-HA (SacII)-REV    | TAT ATC CGC GGT CAT GCA TAG TCC GGG ACG TCA<br>TAG GGA TAG CCA TTG CTA TCT TTT GAC CCA GCA                                 | <i>rlc1</i> <sup>+</sup> cloning in pZ3Ev plasmid                            |
| PromRlc1(XhoI)-FWD     | <b>TATAACTCGAGGGTGTGCAAGTTCAGACTC</b>                                                                                      | <i>rlc1</i> <sup>+</sup> cloning in Pjk210 plasmid                           |
| Rlc1-GFP(SacII)-REV    | TATTACCGCGGCAGATCTATATTACCCTG                                                                                              | <i>rlc1</i> <sup>+</sup> cloning in Pjk210 plasmid                           |
| Pak2-Comp-FWD          | TGTAACCAATGTCATGTTGCT                                                                                                      | Confirmation of <i>pak2</i> <sup>+</sup> deletion                            |
| PromPak2(XhoI)-FWD     | ACTTACTCGAGCAGTACTCCCAACTTGTAGATAATG                                                                                       | <i>pak2</i> <sup>+</sup> cloning in Pjk210 plasmid                           |
| Pak2GFP(SmaI/XmaI)-REV | ATTAACCCGGGATT AAT ATG GGT ATT CGC TTT GC                                                                                  | <i>pak2</i> <sup>+</sup> cloning in Pjk210 plasmid                           |
| GFP1-FWD               | tctcgcaaagcgaataccatattaatccc<br>AGTAAAGGAGAAGAACTTTTCACTGG                                                                | GFP-tagging for Pak2-3GFP assembly                                           |
| GFP1-REV               | tccttactggatctTTTGTATAGTTCATCCATGCCATGTG                                                                                   | GFP-tagging for Pak2-3GFP assembly                                           |
| GFP2-FWD               | gatgaactatacaaaaAGATCCAGTAAAGGAGAAGAACTTTTC                                                                                | GFP-tagging for Pak2-3GFP assembly                                           |
| GFP2-REV               | aagttcttctcttactgttaattaaccctTTTGTATAGTTCATCCATGCCA<br>TGTG                                                                | GFP-tagging for Pak2-3GFP assembly                                           |
| PromPak1-FWD           | cgacggatcgcgataagcttgatatcgaattcctgcagccc<br>TTTAAAAGTATTTGAGTATAATAAATGAAAATTAG                                           | Assembly of <i>pak1</i> <sup>+</sup> promoter Pak2-GFP construct             |



|                       |                                                                                                     |                                                                                                             |
|-----------------------|-----------------------------------------------------------------------------------------------------|-------------------------------------------------------------------------------------------------------------|
| <b>PromPak1-REV</b>   | cctcttacacttaaagcatAGTAAATAAATTTATTAACGAAAAGGG                                                      | Assembly of <i>pak1</i> <sup>+</sup> promoter Pak2-GFP construct                                            |
| <b>Pak2-GFP-FWD</b>   | cgtaataaatttattactATGCTTTTAAGTGTAAGAGGCGTGC                                                         | Assembly of <i>pak1</i> <sup>+</sup> promoter Pak2-GFP construct                                            |
| <b>Pak2-GFP-REV</b>   | caagggagacattcctttaCTATTTGTATAGTTCATCCATGCCATG                                                      | Assembly of <i>pak1</i> <sup>+</sup> promoter Pak2-GFP construct                                            |
| <b>Nmt-TERM-FWD</b>   | tggatgaactatacaaatagTAAAAGGAATGTCTCCCTTGCCAGTAC                                                     | Assembly of <i>pak1</i> <sup>+</sup> promoter Pak2-GFP construct                                            |
| <b>Nmt1-TERM-REV</b>  | ccaccgcggtggcgccgctctagaactagtgatcccc<br>GCATTAATAATAGAAAGGATTATTTCACTTCTAATTACAC                   | Assembly of <i>pak1</i> <sup>+</sup> promoter Pak2-GFP construct                                            |
| <b>Ste11-del-FWD</b>  | TTAATTCTAAGAACCGTTTCATTTGTTTTATTTTCTCCCTTACTTTACTACAATTTTTATATTTACTCTTCTCTACACACGGATCCCGGGTTAATTA   | <i>ste11</i> <sup>+</sup> deletion                                                                          |
| <b>Ste11-del-REV</b>  | ACAAATCAGCTGCATGCTTTTGTGACGCGTTAAAAATGATCGTTTGTGAAAACAAAGCCATGTTTGCATAGAAATATTTGAATTCGAGCTCGTTTAAAC | <i>ste11</i> <sup>+</sup> deletion                                                                          |
| <b>Ste11-comp-FWD</b> | TCACACCAGTTTTTATTCCGGTG                                                                             | Confirmation of <i>ste11</i> <sup>+</sup> deletion                                                          |
| <b>PromSte11-FWD</b>  | CATAACATTTCTTTGTTTTT<br>TGCATTCTCTTTATTTATAAATGGGGTTTCTTTATTTATACATTTGAGCTAAAATGTATA                | G replaced by A (site directed mutagenesis) in TRbox1 and 2 sites within <i>ste11</i> <sup>+</sup> promoter |
| <b>PromSte11-REV</b>  | TATACATTTTAGCTCAAATGTATAAATAAAGAAACCCATT<br>TATAAATAAAGAGAATGCAAAAAACAAAGAAATGTTATG                 | G replaced by A (site directed mutagenesis) in TRbox1 and 2 sites within <i>ste11</i> <sup>+</sup> promoter |
| <b>For3-Seq-F</b>     | GGCCACACTGAACCAAAGAG                                                                                | <i>for3</i> <sup>+</sup> sequencing                                                                         |
| <b>Myp2-Comp-FWD</b>  | GTGCCTAATATCCTGGCAAAG                                                                               | Confirmation of <i>myo3</i> <sup>+</sup> deletion                                                           |
| <b>For3-Comp-FWD</b>  | CATCACATCTGATACCTGCGTT                                                                              | Confirmation of <i>for3</i> <sup>+</sup> deletion                                                           |
| <b>Nat-Comp-REV</b>   | TTATTGTCAGTACTGATTAGGGGCA                                                                           | Confirmation of gene tagging                                                                                |

31

32
